# Supplementary material for: Engineering a synthetic cell panel to identify signalling components reprogrammed by the cell growth regulator anterior gradient-2
Source: Royal Society of Chemistry journal article supplement (doi:10.1039/c4mb00113c), 2014-03-28
Supplement: c4mb00113c1.pdf [file c4mb00113c1.pdf]

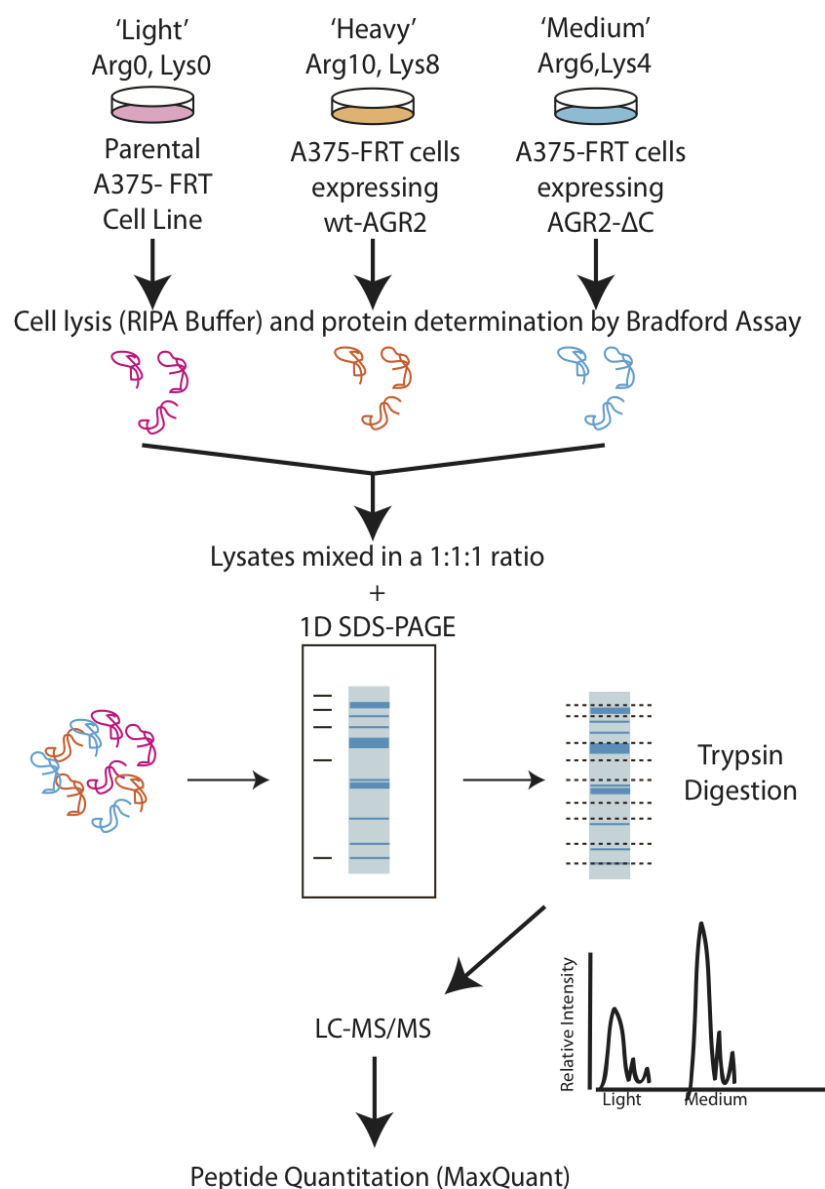

**Supplementary Figure 1. Schematic of SILAC experimental protocol.** Isogenic cells were in media containing stable isotope labelled amino acids for 6 division cycles to allow incorporation of labelled amino acid residues into newly synthesised proteins<sup>50</sup>. Cells were then lysed in RIPA buffer before protein concentration was determined by Bradford assay. Labelled proteins were then mixed in a 1:1:1 ratio before reduction with DTT and alkylation (iodoacetamide) prior to being separated by 1D SDS-PAGE and visualised by Coomassie staining. The gel lane was then excised and cut into 10 sections. Each section was subjected to in-gel trypsinization before the tryptic peptides were extracted by 1% formic acid and processes as indicated in the Methods.

**Supplementary Table 1. Identification of proteins differentially expressed through AGR2**

**expression.** Summary of the fold changes in the expression (normalized and log2 ratios) of the indicated proteins in indicated AGR2 expressing cell line, relative to FRT-AGR2 negative control cell line.
