# Supplementary material for: Engineering a synthetic cell panel to identify signalling components reprogrammed by the cell growth regulator anterior gradient-2
Source: Royal Society of Chemistry journal article supplement (doi:10.1039/c4mb00113c), 2014-03-28
Supplement: c4mb00113c2.xlsx [file c4mb00113c2.xlsx]

## Sheet: Sheet1
		FRT-wtAGR2 / FRT	FRT-wtAGR2 / FRT	FRT-AGR2ΔC / FRT	FRT-AGR2ΔC / FRT	FRT-wtAGR2 / FRT-AGR2ΔC	FRT-wtAGR2 / FRT-AGR2ΔC
Protein IDs	Protein Descriptions	Normalised Ratios	Log2 Ratios	Normalised Ratios	Log2 Ratios	Normalised Ratios	Log2 Ratios	Uniprot	Peptides	Sequence Coverage [%]	PEP
IPI00018434	Isoform 1 of Tumor susceptibility gene 101 protein	3.53438	1.82146	1.08021	0.111313	3.7094	1.89119	Q99816-1	2	4.4	0.19821
IPI00004233	Isoform Long of Antigen KI-67	3.13856	1.6501	1.25817	0.331331	2.86642	1.51925	P46013-1	3	2.8	0.0059478
IPI00002335	Huntingtin	2.70664	1.4365	0.235531	-2.08601	7.3991	2.88735	P42858	3	1.9	0.02353
IPI00941193	48 kDa protein	2.54019	1.34494	3.89954	1.96331	0.733538	-0.447056	A3F719	4	12.2	1.4458e-12
IPI00743894	Isoform 1 of Zinc finger C3H1 domain-containing protein	2.27809	1.18783	1.56573	0.646838	1.43629	0.522344	O60293-1	3	3.6	4.7793e-07
IPI00747462	cDNA FLJ54004, moderately similar to Band 4.1-like protein 2	2.23549	1.16059	1.63119	0.705924	1.55372	0.635726	B4DJ76	9	43.9	2.8699e-137
IPI00295772	cytochrome P450, family 51, subfamily A, polypeptide 1 isoform 1	1.96713	0.97609	0.747003	-0.420814	2.99904	1.5845	Q16850-1	4	14.7	2.2221e-46
IPI00550882	Pyrroline-5-carboxylate reductase	1.946	0.960513	1.48426	0.56974	1.20469	0.268661	B4DMU0	3	10.4	8.2002e-44
IPI00844014	Uncharacterized protein C9orf114	1.80369	0.850954	0.795985	-0.329187	2.5689	1.36115	Q5T280	2	9.6	3.3298e-12
IPI00018196	Notchless protein homolog 1	1.75947	0.81514	1.83577	0.876387	1.21468	0.280581	Q9NVX2	1	2.3	0.028388
IPI00746777	Alcohol dehydrogenase class-3	1.74995	0.807314	1.49904	0.584044	1.34163	0.423987	P11766	2	10.2	0.025404
IPI00290110	Programmed cell death protein 4	1.71733	0.78017	1.54054	0.623433	1.23333	0.302555	Q53EL6	3	9.6	5.4718e-12
IPI00296907	Isoform 1 of Peroxisomal acyl-coenzyme A oxidase 1	1.70364	0.768618	0.798833	-0.324034	2.14953	1.10402	Q15067-1	3	8.8	1.0434e-10
IPI00219532	Isoform 1 of Engulfment and cell motility protein 1	1.70062	0.76606	1.20538	0.269493	1.25091	0.322981	Q92556-1	2	7.6	2.4304e-07
IPI00007304	Protein ariadne-2 homolog	1.70027	0.765764	1.45043	0.536483	1.32894	0.410281	O95376	2	5.7	0.00015609
IPI00743696	Isoform 1 of Collagen alpha-1(IV) chain	1.6716	0.74123	0.784469	-0.350212	2.40102	1.26365	P02462-1	2	1.9	1.1369e-18
IPI00940192	Putative uncharacterized protein CTAG1A	1.66208	0.732991	1.15569	0.208755	1.66039	0.731521	B7WPC8	2	17.6	4.8773e-18
IPI00023649	Isoform 1 of Protein strawberry notch homolog 1	1.66046	0.73158	1.01482	0.0212287	1.46444	0.550353	A3KN83-1	1	2	5.4166e-05
REV__IPI00854651	>IPI:IPI00854651.1|SWISS-PROT:Q68DA7-1|ENSEMBL:ENSP00000396491 Tax_Id=9606 Gene_Symbol=FMN1 Isoform 1 of Formin-1	1.65651	0.728147	0.810555	-0.303018	1.86979	0.902874	Q68DA7-1	2	1.1	0.2128
IPI00045946	Isoform 1 of ATP-dependent metalloprotease YME1L1	1.64873	0.721358	0.557058	-0.8441	1.59331	0.672028	Q96TA2-1	4	7.9	1.3426e-68
IPI00003927	40 kDa peptidyl-prolyl cis-trans isomerase	1.62169	0.697496	1.26264	0.336441	1.18595	0.246044	Q08752	5	14.6	7.1797e-17
IPI00031836	Developmentally-regulated GTP-binding protein 1	1.60695	0.684321	1.0494	0.0695645	1.73602	0.795782	Q9Y295	3	16.1	2.3273e-19
IPI00045396	Isoform 2 of Calumenin	1.59778	0.676065	1.16428	0.219433	1.59927	0.677413	O43852-2	20	72.1	0
IPI00024462	Dihydroorotate dehydrogenase, mitochondrial	1.59	0.669026	1.2517	0.323885	1.13117	0.177821	Q02127	2	7.1	4.0337e-44
IPI00414597	Alpha-1,2-glucosyltransferase ALG10-A	1.58861	0.667761	1.19893	0.261753	1.34288	0.425329	Q5BKT4	3	4.9	0.72788
IPI00555565	Putative heat shock protein HSP 90-beta 4	1.577	0.657181	1.38635	0.471287	1.28906	0.366324	Q58FF6	8	10.3	6.7419e-124
IPI00747787	Condensin-2 complex subunit D3	1.56876	0.649622	0.584035	-0.775874	1.67903	0.747629	P42695	5	4.1	2.2783e-19
IPI00478758	Isoform 1 of UPF0557 protein C10orf119	1.5597	0.641272	1.22734	0.295529	1.50702	0.591694	Q9BTE3-1	2	8.6	0.00037995
IPI00374563	Agrin	1.55355	0.63557	0.939988	-0.0892865	1.19652	0.258846	O00468	7	5	1.3076e-39
IPI00871467	Isoform 1 of Neural cell adhesion molecule L1	1.55297	0.635031	0.673564	-0.570114	2.0813	1.05748	P32004-1	29	31.3	7.5709e-212
IPI00022543	GPI-anchor transamidase	1.55053	0.632765	1.52575	0.609516	1.08908	0.123114	Q92643	2	8.6	3.7698e-09
IPI00927044	Putative uncharacterized protein POLR2H	1.54891	0.631252	1.4277	0.513694	1.06515	0.091063	C9JCU7	2	14.3	5.8195e-15
IPI00438286	ERBB2IP protein	1.52929	0.612864	0.922556	-0.116292	1.42466	0.510616	Q96RT1-1	1	1.6	1.5543e-19
IPI00845373	Isoform 1 of Nuclear factor NF-kappa-B p100 subunit	1.52709	0.610781	2.30368	1.20394	0.728849	-0.456309	Q00653-1	12	19.9	4.6268e-118
IPI00027096	39S ribosomal protein L19, mitochondrial	1.5207	0.604737	0.980069	-0.0290449	1.26946	0.344215	P49406	2	7.5	0.075216
IPI00789798	Putative uncharacterized protein RAI1	1.5185	0.602644	1.00123	0.00176706	1.01643	0.0235149	A8MTC3	1	1.3	7.4903e-19
IPI00009276	Endothelial protein C receptor precursor	1.5178	0.601982	1.26309	0.336957	0.965308	-0.050938	Q9UNN8	3	13.1	8.986e-06
IPI00000279	Similar to Zinc finger CCCH domain-containing protein 15	1.50828	0.592906	1.29374	0.371543	1.14549	0.195969	Q8WU90	3	7	7.2618e-15
IPI00022460	Zinc finger protein 592	1.50782	0.592462	0.976536	-0.034255	1.89006	0.918435	Q92610	2	2.8	4.8063e-08
IPI00032881	28S ribosomal protein S23, mitochondrial	1.50399	0.588792	1.27596	0.351585	1.06813	0.0950923	Q9Y3D9	2	11.6	0.0019056
IPI00022442	Acyl carrier protein, mitochondrial	1.50259	0.587456	0.936578	-0.0945292	1.61205	0.688897	O14561	2	15.4	0.052419
IPI00299468	Acyl-CoA desaturase	1.5019	0.586787	1.06568	0.0917765	1.59783	0.676112	O00767	1	3.6	8.8813e-17
IPI00306518	Isoform 3 of Fanconi anemia group I protein	1.49621	0.581313	0.421094	-1.24779	2.4334	1.28298	Q9NVI1-3	4	4.1	3.082e-86
IPI00022648	Eukaryotic translation initiation factor 5	1.49192	0.577166	1.25711	0.330105	1.33461	0.416423	P55010	10	29	2.6006e-26
IPI00294603	Similar to Zinc finger MYM-type protein 5	1.48263	0.568158	0.987956	-0.0174807	1.51326	0.597661	Q9UBW7	2	4.6	0.25912
IPI00307829	Isoform 1 of Cingulin-like protein 1	1.47833	0.563973	1.23677	0.306577	1.22064	0.28764	Q0VF96-1	2	1.4	0.02342
IPI00291412	Protein phosphatase 1F	1.47404	0.559775	1.33189	0.413471	1.02566	0.0365501	P49593	3	12.8	1.8179e-44
IPI00166528	Isoform 3 of Rapamycin-insensitive companion of mTOR	1.47265	0.558412	1.48864	0.573993	0.845147	-0.242726	Q6R327-3	5	6	3.7303e-16
IPI00044761	Pseudouridylate synthase 7 homolog	1.46951	0.555338	0.980918	-0.0277957	1.78061	0.832369	Q96PZ0	5	12.6	5.2454e-10
IPI00410214	Isoform 1 of 3(2),5-bisphosphate nucleotidase 1	1.46116	0.54711	1.07643	0.106256	0.929935	-0.104799	O95861-1	2	7.8	0.020032
IPI00759546	Isoform 5 of Afadin	1.45872	0.544701	1.09918	0.136423	0.873688	-0.194809	P55196-5	5	4.6	7.42e-15
IPI00029730	Syntaxin-4	1.45825	0.544242	1.06014	0.084249	1.38093	0.465644	Q12846	2	15.5	4.7636e-18
IPI00006952	Beta-lactamase-like protein 2	1.45767	0.543667	1.16102	0.215389	0.941092	-0.0875928	Q53H82	3	12.8	0.00067579
IPI00031517	DNA replication licensing factor MCM6	1.45535	0.541368	0.933538	-0.0992196	1.56371	0.644976	Q14566	28	43.6	4.2027e-277
IPI00306322	Collagen alpha-2(IV) chain	1.45396	0.539986	0.63492	-0.655353	2.20085	1.13806	P08572	3	2.3	5.7556e-106
IPI00304435	Protein NipSnap homolog 1	1.45315	0.53918	1.24771	0.319284	1.22055	0.287526	Q9BPW8	6	37	6.1249e-49
IPI00718888	Isoform 2 of Ribose-phosphate pyrophosphokinase 2	1.45222	0.538258	1.21979	0.286633	1.14847	0.199716	P11908-2	6	24.9	6.6791e-50
IPI00026105	Isoform SCPx of Non-specific lipid-transfer protein	1.44978	0.535834	0.743607	-0.427388	1.46761	0.553473	P22307-1	3	5.7	8.6327e-08
IPI00003766	Protein ETHE1, mitochondrial	1.4449	0.530975	1.401	0.486455	0.945743	-0.0804801	O95571	2	9.1	1.0336e-12
IPI00412670	Isoform 1 of Protein midA homolog, mitochondrial	1.44258	0.528655	0.949915	-0.074129	1.40592	0.491514	Q7L592-1	4	13.2	0.00014068
IPI00218319	Isoform 2 of Tropomyosin alpha-3 chain	1.442	0.528074	1.42236	0.508287	0.993369	-0.00959806	P06753-2	21	56	1.5408e-282
IPI00011461	Isoform Beta of Striatin-3	1.43875	0.524819	1.13644	0.184517	1.27926	0.355312	Q13033-1	2	3	0.0095337
IPI00298738	DNA-directed RNA polymerase, mitochondrial precursor	1.43307	0.519104	0.903193	-0.146894	1.45897	0.544946	O00411	7	8.6	4.688e-35
IPI00295457	Isoform 2 of Myosin phosphatase Rho-interacting protein	1.42889	0.514891	1.44057	0.526643	1.12291	0.167242	Q6WCQ1-2	19	26.3	4.8643e-144
IPI00009922	SRA stem-loop-interacting RNA-binding protein, mitochondrial	1.42691	0.512898	1.24544	0.316654	1.10071	0.138436	Q9GZT3	1	12.8	1.7466e-07
IPI00220362	10 kDa heat shock protein, mitochondrial	1.42552	0.511489	1.11583	0.158114	1.30973	0.389264	P61604	5	52	2.877e-42
IPI00395627	Isoform 1 of Calcyclin-binding protein	1.42471	0.510666	0.922569	-0.116271	1.58562	0.66505	Q9HB71-1	12	62.3	6.324e-199
IPI00165393	Acidic leucine-rich nuclear phosphoprotein 32 family member E	1.42331	0.509255	1.3445	0.427068	1.12089	0.164647	Q9BTT0	6	31.7	1.8903e-292
IPI00008728	ATP-dependent Clp protease ATP-binding subunit clpX-like, mitochondrial	1.42331	0.509255	0.557058	-0.8441	1.78503	0.835947	O76031	7	16.3	2.0688e-16
IPI00007309	Mitochondrial import inner membrane translocase subunit Tim23	1.4225	0.508431	1.47453	0.560258	1.0937	0.129212	O14925	2	18.7	0.25924
IPI00910962	cDNA FLJ52813, highly similar to Homo sapiens ELOVL family member 5, elongation of long chain fatty acids, mRNA	1.4203	0.506193	0.636276	-0.652276	1.665	0.735523	B4DZJ2	2	5.8	3.9748e-18
IPI00644775	Exosome complex exonuclease RRP46	1.41786	0.503714	1.57724	0.657398	1.01922	0.027465	Q9NQT4	1	4.5	2.2753e-14
IPI00019346	Ras-related protein Rap-2a	1.41658	0.502415	1.25476	0.327416	1.2143	0.280124	P10114	2	19.1	0.16049
IPI00013860	3-hydroxyisobutyrate dehydrogenase, mitochondrial	1.41438	0.500167	1.20963	0.274565	1.00432	0.00622538	P31937	7	35.7	4.7781e-103
IPI00024650	Monocarboxylate transporter 1	1.41345	0.499219	1.00351	0.00505848	1.62925	0.70421	P53985	8	19.2	1.6483e-108
IPI00296830	Isoform 1 of Leucine zipper protein 1	1.41229	0.498034	1.80619	0.852953	0.886479	-0.173842	Q86V48-1	2	2.2	5.9874e-07
IPI00029267	U2 small nuclear ribonucleoprotein B	1.40637	0.491974	1.54177	0.624587	1.09139	0.126166	P08579	4	21.3	1.6433e-104
IPI00025244	Zinc finger protein ZPR1	1.40486	0.490425	1.14119	0.190537	1.05305	0.0745689	O75312	2	5.2	5.4256e-12
IPI00470610	Pyrroline-5-carboxylate reductase 2	1.40393	0.489471	0.964883	-0.0515747	1.08755	0.121076	Q96C36	8	39.7	5.9585e-73
IPI00022002	cDNA FLJ54536, highly similar to Mitochondrial 28S ribosomal protein S27	1.40056	0.486008	1.11165	0.152704	1.11791	0.160808	B4DRT2	7	24.3	2.6758e-129
IPI00030275	Heat shock protein 75 kDa, mitochondrial	1.40045	0.485888	0.989038	-0.0159018	1.46435	0.550258	Q12931	31	56.7	0
IPI00795654	Isoform 1 of Activating transcription factor 7-interacting protein 1	1.3994	0.484812	0.878215	-0.187353	1.9457	0.960293	Q6VMQ6-1	9	11.8	7.5607e-58
IPI00294911	Succinate dehydrogenase [ubiquinone] iron-sulfur subunit, mitochondrial	1.39314	0.478335	1.15454	0.207318	1.24274	0.31353	P21912	5	22.5	5.9013e-14
IPI00007004	RRP15-like protein	1.39105	0.47617	0.944575	-0.0822629	1.07736	0.107499	Q9Y3B9	2	8.5	1.0379e-06
IPI00328987	Bystin	1.38884	0.473881	1.29296	0.370672	1.00951	0.0136605	Q13895	4	14.9	6.9471e-34
IPI00297455	A-kinase anchor protein 8-like	1.38872	0.47376	1.06854	0.0956458	0.970209	-0.0436318	Q9ULX6	3	6.3	2.5883e-26
IPI00103467	Aldehyde dehydrogenase X, mitochondrial	1.38849	0.473519	1.20484	0.268838	1.21593	0.282064	P30837	12	35	6.7685e-91
IPI00027705	Isoform 1 of DNA primase large subunit	1.38814	0.473157	0.870547	-0.200006	1.61426	0.690874	P49643-1	5	12.2	1.3796e-22
IPI00910524	cDNA FLJ56243, highly similar to Melanoma-associated antigen 4	1.38698	0.47195	1.34843	0.431279	1.05189	0.0729881	P43358	13	35.9	1.4777e-127
IPI00829589	cDNA FLJ77219	1.38664	0.471588	1.01015	0.014575	1.39871	0.484099	A8KAG1	4	13.7	3.1544e-22
IPI00924510	Putative uncharacterized protein RIF1	1.38141	0.466143	0.701951	-0.510558	1.36268	0.446442	C9JI70	3	1.7	5.14e-17
IPI00019353	Isoform 1 of Acylglycerol kinase, mitochondrial	1.37921	0.463838	1.20981	0.274777	1.18595	0.246044	Q53H12-1	10	32	1.9522e-56
IPI00025346	Isoform 1 of Peroxisomal membrane protein PEX14	1.37886	0.463474	1.34881	0.431689	1.22516	0.292968	O75381-1	5	22.5	1.4524e-25
IPI00414973	FAST kinase domain-containing protein 5	1.37839	0.462988	0.83823	-0.254582	1.50048	0.585425	Q7L8L6	2	4.2	3.6606e-07
IPI00646762	Putative uncharacterized protein NUDT5	1.37747	0.462016	1.27577	0.351368	1.09206	0.127055	A6NFX8	4	21.6	1.8728e-07
IPI00059279	Exocyst complex component 4	1.37538	0.459826	1.51603	0.600294	0.82487	-0.277761	Q96A65	2	5.4	4.6382e-33
IPI00374747	Isoform 2 of Origin recognition complex subunit 3	1.37514	0.459582	0.491205	-1.0256	0.970306	-0.0434889	Q9UBD5-2	2	4.5	6.0034e-26
IPI00299507	Condensin complex subunit 2	1.37294	0.457267	1.06646	0.0928328	0.847059	-0.239465	Q15003	5	10	4.3552e-11
IPI00024167	ESF1 homolog	1.37294	0.457267	1.02837	0.0403544	1.26312	0.336989	Q9H501	3	4.3	2.2269e-18
IPI00029275	Isoform 1 of Melanotransferrin	1.3698	0.45397	0.910587	-0.135131	1.15962	0.213651	P08582-1	3	4.9	3.8313e-05
IPI00917964	Putative uncharacterized protein MPP6	1.36911	0.453236	1.10935	0.149716	1.32251	0.403275	B9A001	13	29.2	8.0989e-57
IPI00892682	transporter 2, ATP-binding cassette, sub-family B isoform 1	1.3683	0.45238	1.21979	0.286633	1.09014	0.124514	Q53FI6	3	4.4	0.0070457
IPI00011898	Translation initiation factor eIF-2B subunit epsilon	1.36667	0.450665	2.03611	1.02582	0.720767	-0.472395	Q13144	1	3.7	3.3107e-30
IPI00163644	Oxysterol-binding protein	1.36667	0.450665	0.805803	-0.3115	1.33894	0.42109	Q9BZF1-1	6	9.2	2.1645e-46
IPI00173359	Uveal autoantigen with coiled-coil domains and ankyrin repeats	1.36551	0.449439	1.4329	0.518942	1.06362	0.0889789	Q9BZF9	14	13.5	7.7668e-68
IPI00017344	Ras-related protein Rab-5B	1.36551	0.449439	1.0468	0.0659832	1.15558	0.208621	P61020	6	33.5	2.5122e-42
IPI00016334	Isoform 1 of Cell surface glycoprotein MUC18	1.36539	0.449317	1.01258	0.0180325	1.26052	0.334022	P43121-1	19	41.2	7.4546e-294
IPI00013214	MCM3 minichromosome maintenance deficient 3 (S. cerevisiae), isoform CRA_b	1.36493	0.448826	0.955598	-0.0655238	1.49894	0.583945	B2R7C5	29	42.2	0
IPI00554681	NADH dehydrogenase [ubiquinone] 1 alpha subcomplex subunit 5	1.35866	0.442185	1.17674	0.234792	1.30165	0.380345	Q16718	2	31	7.2959e-46
IPI00018350	DNA replication licensing factor MCM5	1.35263	0.435762	0.790302	-0.339524	1.50471	0.589484	P33992	21	37.3	1.6996e-131
IPI00107753	optic atrophy 1 isoform 8	1.35181	0.434895	1.10372	0.142378	1.0098	0.0140725	O60313-2	10	13.5	1.4702e-52
IPI00908416	eukaryotic translation initiation factor 4E isoform 2	1.35123	0.434276	1.46317	0.549095	0.811359	-0.301588	A8MX72	3	12.9	3.5267e-28
IPI00217223	Multifunctional protein ADE2	1.35077	0.43378	1.36631	0.450287	1.10965	0.150102	P22234	22	56.1	0
IPI00219171	Isoform 2 of POU domain, class 2, transcription factor 1	1.34798	0.430801	1.11399	0.15574	1.39698	0.482314	P14859-2	2	3.6	2.0223e-09
IPI00184330	DNA replication licensing factor MCM2	1.34647	0.429185	0.872094	-0.197444	1.58149	0.661286	P49736	31	45	0
IPI00398992	Isoform 1 of Chromodomain-helicase-DNA-binding protein 8	1.34496	0.427568	0.754137	-0.407101	1.58793	0.667147	Q9HCK8-1	6	3.1	8.2407e-21
IPI00096066	Succinyl-CoA ligase [GDP-forming] subunit beta, mitochondrial	1.33986	0.422079	1.24711	0.318587	1.10407	0.142838	Q96I99	18	47.9	1.7739e-192
IPI00647915	24 kDa protein	1.33707	0.419076	1.73937	0.798564	0.907342	-0.140282	P37802	15	77.3	3.4498e-277
IPI00015826	ATP-binding cassette sub-family B member 10, mitochondrial	1.33173	0.413303	1.5063	0.591012	0.830329	-0.268246	Q9NRK6	5	8.3	7.5324e-27
IPI00470573	actin-related protein 2 isoform a	1.32976	0.411164	1.14561	0.196118	1.1502	0.201887	B4DHK9	4	18.3	3.038e-57
IPI00294578	Isoform 1 of Protein-glutamine gamma-glutamyltransferase 2	1.32674	0.407886	2.16784	1.11626	0.614088	-0.703483	P21980-1	29	51.8	0
IPI00016725	General transcription factor 3C polypeptide 4	1.3257	0.40675	1.05645	0.0792274	0.975014	-0.0365045	Q9UKN8	2	4.5	5.0894e-156
IPI00166749	Mitochondrial-processing peptidase subunit alpha	1.3243	0.405233	1.12273	0.16701	1.2068	0.271191	Q10713	14	34.3	1.4359e-79
IPI00639925	129 kDa protein	1.32314	0.403968	1.06474	0.0904968	1.12752	0.173156	Q96QU8	2	3.4	6.8176e-34
IPI00219420	Structural maintenance of chromosomes protein 3	1.32245	0.403208	0.96302	-0.0543619	1.32001	0.400546	Q9UQE7	29	31.6	3.5336e-256
IPI00947052	Putative uncharacterized protein RBBP7	1.32175	0.402448	1.26484	0.338957	0.877302	-0.188855	C9JAJ9	2	45.9	0.12697
IPI00299904	Isoform 1 of DNA replication licensing factor MCM7	1.32012	0.400673	0.893717	-0.162111	1.44849	0.534551	P33993-1	22	42.7	1.435e-204
IPI00872822	HECT, UBA and WWE domain containing 1	1.31931	0.399785	1.18897	0.249707	1.16971	0.226151	Q5H964	3	13.7	4.7763e-42
IPI00029737	Isoform Long of Long-chain-fatty-acid--CoA ligase 4	1.31711	0.397371	1.01074	0.0154157	1.09033	0.124768	O60488-1	12	25.2	2.7787e-55
IPI00008982	Isoform Long of Delta-1-pyrroline-5-carboxylate synthetase	1.31641	0.396608	0.992626	-0.0106779	1.29454	0.372441	P54886-1	33	55.7	0
IPI00657805	Isoform 1 of 5-3 exoribonuclease 1	1.31583	0.395972	1.62612	0.701436	0.635403	-0.654257	Q8IZH2-1	4	3.4	4.6921e-34
IPI00006440	28S ribosomal protein S7, mitochondrial	1.31548	0.39559	0.809638	-0.304652	1.53421	0.617497	Q9Y2R9	3	14.5	0.0094019
IPI00219841	DNA ligase 1	1.31548	0.39559	0.80123	-0.319712	1.59341	0.672115	P18858	3	7.4	1.0898e-30
IPI00456970	Isoform 1 of Cell division cycle 2-like protein kinase 5	1.31444	0.394444	1.14804	0.199167	1.04968	0.0699535	Q14004-1	4	4.4	1.032e-76
IPI00306604	Integrin alpha-5	1.31304	0.392915	0.705771	-0.502728	1.97598	0.982565	P08648	4	9	1.702e-32
IPI00221172	Putative E3 ubiquitin-protein ligase UBR7	1.31165	0.391383	0.906548	-0.141545	1.6403	0.713963	Q8N806	1	8.2	0.0014842
IPI00439194	Isoform 1 of Methyl-CpG-binding domain protein 3	1.31119	0.390873	1.21134	0.276605	1.14713	0.198025	O95983-1	2	18.6	8.1022e-11
IPI00375358	Isoform 1 of Replication factor C subunit 1	1.30689	0.386139	0.939536	-0.0899802	1.22545	0.293308	P35251-1	3	4.5	1.2732e-07
IPI00217748	Uncharacterized protein C3orf59	1.30654	0.385755	0.917571	-0.124108	1.61426	0.690874	Q8IYB1	1	6.1	0.00087105
IPI00383849	phospholipase C, gamma 1 isoform a	1.30283	0.381647	1.45262	0.538661	0.783952	-0.351164	A2A284	2	4	1.3018e-17
IPI00795318	cDNA FLJ54365, highly similar to DNA replication licensing factor MCM4	1.30283	0.381647	0.873929	-0.194411	1.50855	0.593165	A4FS09	30	47.9	0
IPI00647217	Superkiller viralicidic activity 2-like 2	1.3026	0.38139	0.976029	-0.0350037	1.29867	0.377039	P42285	42	51	0
IPI00234252	SWI/SNF complex subunit SMARCC1	1.30202	0.380747	1.08066	0.111916	1.24265	0.313418	Q92922	33	40.6	0
IPI00008219	UV excision repair protein RAD23 homolog A	1.3019	0.380619	0.844241	-0.244272	1.04094	0.057884	P54725	9	43.8	2.999e-104
IPI00646015	acyl-Coenzyme A thioesterase 2, mitochondrial isoform a	1.30132	0.379976	1.04718	0.0665115	1.23342	0.302668	Q9Y305-1	12	33	7.4886e-70
IPI00384707	EARS2 protein	1.30086	0.379461	0.523659	-0.9333	1.98011	0.985579	Q86YH3	3	7.3	0.00013272
IPI00745613	Exosome complex exonuclease RRP41	1.299	0.3774	1.22312	0.290563	1.01259	0.0180486	Q9NPD3	3	12.2	8.8193e-06
IPI00328867	Isoform 2 of Proto-oncogene tyrosine-protein kinase Src	1.2983	0.376626	1.40634	0.491944	0.974342	-0.0375002	P12931-2	6	14.8	6.0141e-34
IPI00744711	Polyribonucleotide nucleotidyltransferase 1, mitochondrial	1.29784	0.37611	0.97848	-0.0313851	1.3006	0.379173	Q8TCS8	18	31.4	3.1336e-273
IPI00299000	Proliferation-associated protein 2G4	1.29761	0.375852	1.23244	0.301521	1.05689	0.0798256	Q9UQ80	24	79.2	0
IPI00301346	DNA-directed RNA polymerase III subunit RPC2	1.29668	0.374819	1.12217	0.166289	1.10811	0.148102	Q9NW08	6	7.8	2.2888e-28
IPI00291467	ADP/ATP translocase 3	1.29552	0.373527	1.36807	0.452137	1.02133	0.0304545	P12236	19	61.7	6.6678e-183
IPI00306380	Isoform 1 of Guanine nucleotide-binding protein-like 3	1.29528	0.373268	1.08311	0.115185	1.19623	0.258498	Q9BVP2-1	11	29.5	1.539e-120
IPI00550234	Isoform 1 of Actin-related protein 2/3 complex subunit 5	1.29528	0.373268	1.01314	0.0188322	1.20873	0.273487	O15511-1	2	16.6	6.6133e-05
IPI00107113	Isoform 1 of U3 small nucleolar RNA-associated protein 14 homolog A	1.2889	0.36614	1.40292	0.488428	0.7958	-0.329521	Q9BVJ6-1	2	3.5	3.2431e-12
IPI00216318	Isoform Long of 14-3-3 protein beta/alpha	1.28832	0.36549	1.25082	0.322874	0.978378	-0.0315363	P31946-1	15	59.8	1.4846e-291
IPI00658000	Isoform 1 of Insulin-like growth factor 2 mRNA-binding protein 3	1.28832	0.36549	0.71689	-0.480175	1.38891	0.473953	O00425-1	9	21.2	2.1097e-85
IPI00022891	ADP/ATP translocase 1	1.28623	0.363149	1.63667	0.71076	0.86896	-0.202638	P12235	17	64.4	3.9008e-128
IPI00011201	NAD-dependent malic enzyme, mitochondrial	1.28542	0.362237	1.07525	0.104677	1.15405	0.2067	P23368	22	61	7.6985e-257
IPI00031519	Isoform 1 of DNA (cytosine-5)-methyltransferase 1	1.28449	0.361194	0.607588	-0.718836	1.96464	0.974262	P26358-1	54	41.1	0
IPI00914566	Farnesyl pyrophosphate synthetase	1.28379	0.360412	1.33604	0.417958	1.04075	0.0576176	P14324	2	8.4	6.0809e-55
IPI00023339	CREB-binding protein	1.28286	0.359368	0.821743	-0.283241	1.33692	0.418914	Q92793	6	3.5	8.3574e-12
IPI00300094	Large subunit GTPase 1 homolog	1.28228	0.358715	1.3398	0.422019	1.138	0.186497	Q9H089	2	3.3	0.0027447
IPI00165361	DCN1-like protein 5	1.28205	0.358454	1.06146	0.0860554	1.45897	0.544946	Q9BTE7	2	15.2	2.1006e-06
IPI00029744	Single-stranded DNA-binding protein, mitochondrial	1.28043	0.356624	1.32108	0.40172	1.09072	0.125277	Q04837	6	44.6	4.63e-242
IPI00549205	Isoform 2 of DNA repair protein RAD50	1.27927	0.355316	1.18702	0.247346	1.07006	0.0976859	Q92878-2	43	39.5	0
IPI00923468	SMARCA4 protein	1.27845	0.354399	1.18575	0.245797	1.09696	0.133515	B9EGQ8	42	34.2	0
IPI00783271	Leucine-rich PPR motif-containing protein, mitochondrial	1.27834	0.354268	1.04424	0.0624497	1.26523	0.339401	P42704	87	69.8	0
IPI00433279	Isoform 1 of Schlafen family member 5	1.27822	0.354137	1.3383	0.420396	0.730357	-0.453325	Q08AF3-1	3	3.6	4.5917e-06
IPI00015361	Prefoldin subunit 5	1.27694	0.352695	1.09203	0.12701	1.02816	0.0400603	Q99471	4	42.9	9.4739e-52
IPI00100247	Thioredoxin-related transmembrane protein 4	1.2766	0.352302	0.889362	-0.169157	1.52441	0.60825	Q9H1E5	2	7.2	0.002305
IPI00218493	Hypoxanthine-guanine phosphoribosyltransferase	1.27602	0.351646	1.54533	0.627914	0.950961	-0.0725419	P00492	7	47.2	4.8059e-52
IPI00339381	Isoform 1 of Helicase-like transcription factor	1.2759	0.351514	1.5771	0.657273	0.893802	-0.161973	Q14527-1	2	3	5.1587e-09
IPI00301100	cDNA FLJ54531, highly similar to Homo sapiens solute carrier family 43, member 3 (SLC43A3), mRNA	1.2752	0.350727	1.08969	0.123913	1.26879	0.34345	A8K2X6	2	3	0.040459
IPI00165506	Polymerase delta-interacting protein 2	1.27369	0.349019	0.951011	-0.0724662	1.40477	0.49033	Q9Y2S7	4	12.5	2.7414e-11
IPI00019548	Isoform Long of Mothers against decapentaplegic homolog 2	1.27358	0.348887	1.43112	0.517149	0.857697	-0.221459	Q15796-1	2	8.1	3.1014e-12
IPI00872028	NUMA1 variant protein (Fragment)	1.27335	0.348624	1.26854	0.343168	1.04161	0.058816	Q4LE64	106	63.5	0
IPI00299463	Nibrin	1.27091	0.34586	1.27669	0.352405	1.14953	0.201043	O60934	2	3.7	0.0030994
IPI00414127	Ran-specific GTPase-activating protein	1.27079	0.345728	1.22328	0.290757	1.15539	0.208381	P43487	5	32.3	1.0184e-21
IPI00027009	Isoform 1 of Protein kinase C and casein kinase substrate in neurons protein 2	1.27068	0.345596	1.29049	0.367919	0.730723	-0.452604	Q9UNF0-1	3	6.8	4.5264e-10
IPI00292894	Pre-rRNA-processing protein TSR1 homolog	1.27068	0.345596	0.763778	-0.388776	1.34595	0.428629	Q2NL82	20	33.8	1.1499e-157
IPI00031768	Protein Hook homolog 3	1.26963	0.34441	2.09499	1.06695	0.504267	-0.987741	Q86VS8	2	3.2	0.0042328
IPI00217540	Isoform 2 of Lysine-specific histone demethylase 1	1.26963	0.34441	0.903056	-0.147113	1.29762	0.375864	O60341-2	12	26.4	3.5502e-132
IPI00744015	Isoform 2A of Cytoplasmic dynein 1 intermediate chain 2	1.26847	0.34309	1.13649	0.184587	1.17355	0.230884	Q13409-1	2	3.6	7.6573e-11
IPI00010779	Isoform 1 of Tropomyosin alpha-4 chain	1.26835	0.342958	1.55464	0.636582	0.833461	-0.262813	P67936-1	16	47.2	1.4196e-182
IPI00647655	DNA polymerase	1.26835	0.342958	0.746017	-0.42272	1.96406	0.973838	A6NMQ1	11	12	1.5743e-46
IPI00017963	Small nuclear ribonucleoprotein Sm D2	1.26743	0.341901	1.12433	0.169068	1.1428	0.192576	P62316	8	61.9	8.0651e-42
IPI00890779	Isoform 13 of Dysferlin	1.26708	0.341505	2.87717	1.52465	0.420411	-1.25013	O75923-13	31	20.8	5.818e-281
IPI00642904	poly A binding protein, cytoplasmic 4 isoform 1	1.26673	0.341108	1.28199	0.358381	1.00942	0.0135232	Q3B867	21	38.2	2.182e-258
IPI00293464	DNA damage-binding protein 1	1.26673	0.341108	0.90993	-0.136173	1.45282	0.538852	Q16531	45	44.4	0
IPI00297475	cDNA FLJ60436, highly similar to Homo sapiens dolichyl-phosphate mannosyltransferase polypeptide 3, transcript variant 1, mRNA	1.26568	0.339918	1.74101	0.799926	0.859869	-0.217811	Q9P2X0-2	1	6	1.3647e-25
IPI00788925	Branched-chain-amino-acid aminotransferase	1.26464	0.338727	0.932086	-0.101465	0.936959	-0.0939415	Q53EW7	3	12	6.6539e-08
IPI00215777	Isoform B of Phosphate carrier protein, mitochondrial	1.26441	0.338462	1.3895	0.474561	1.00067	0.000970159	Q00325-2	16	49	2.1862e-171
IPI00291006	Malate dehydrogenase, mitochondrial	1.26429	0.338329	1.2103	0.275365	1.08947	0.123623	P40926	18	65.7	0
IPI00042580	Isoform 1 of Apolipoprotein O	1.26406	0.338065	1.37388	0.458261	1.22506	0.292855	Q9BUR5-1	3	20.7	5.4201e-38
IPI00023406	Cytochrome c-type heme lyase	1.2636	0.337534	1.14778	0.19884	1.23054	0.299292	P53701	7	31.7	1.2131e-99
IPI00456048	COMM domain-containing protein 2	1.26325	0.337137	1.1426	0.192319	1.25332	0.32575	Q86X83	1	12.1	3.9291e-09
IPI00215767	Isoform Long of Beta-1,4-galactosyltransferase 1	1.26313	0.337004	0.979275	-0.0302146	1.26927	0.343996	P15291-1	3	9.8	5.3758e-07
IPI00005728	RER1 protein	1.2622	0.335943	1.22632	0.294338	0.870219	-0.200549	O15258	4	22.4	5.0745e-30
IPI00105598	Proteasome 26S non-ATPase subunit 11 variant (Fragment)	1.26069	0.334217	1.20312	0.266786	1.10648	0.145974	O00231	17	46.1	0
IPI00306723	CCAAT/enhancer-binding protein zeta	1.25884	0.332091	0.806515	-0.310226	1.41255	0.498302	Q03701	22	30.7	5.2218e-226
IPI00014230	Complement component 1 Q subcomponent-binding protein, mitochondrial	1.25768	0.33076	1.35419	0.437434	0.994234	-0.00834252	Q07021	8	51.4	0
IPI00028888	Isoform 1 of Heterogeneous nuclear ribonucleoprotein D0	1.25698	0.329961	0.91627	-0.126155	1.37488	0.459306	Q14103-1	14	35.8	1.1297e-109
IPI00036742	Isoform 1 of Protein virilizer homolog	1.25698	0.329961	0.8029	-0.316707	1.38997	0.475051	Q69YN4-1	5	5	1.5954e-33
IPI00292953	Isoform 2 of Ankycorbin	1.2564	0.329294	1.17844	0.236872	0.89656	-0.157528	Q9P0K7-2	9	11.4	7.0128e-20
IPI00006657	Protein FAM20B	1.25489	0.327561	1.18132	0.240405	1.14415	0.194273	O75063	1	4.6	1.0995e-84
IPI00413895	Golgi autoantigen, golgin subfamily a, 2	1.25431	0.326893	1.16248	0.217209	1.10331	0.141833	Q08379-2	13	18.3	8.389e-90
IPI00411559	Isoform 1 of Structural maintenance of chromosomes protein 4	1.25431	0.326893	1.14745	0.198427	1.09216	0.127182	Q9NTJ3-1	50	43.2	0
IPI00217143	SDHA protein	1.25384	0.326359	1.121	0.164791	1.23967	0.309955	Q8IW48	17	50	3.8212e-226
IPI00019502	Isoform 1 of Myosin-9	1.25338	0.325825	1.54273	0.625483	0.859523	-0.218391	P35579-1	142	66.6	0
IPI00000792	Quinone oxidoreductase	1.25338	0.325825	0.922679	-0.1161	1.07697	0.106985	Q08257	6	34	1.1135e-19
IPI00217519	Ras-related protein Ral-A	1.25315	0.325557	1.2935	0.371283	1.02652	0.0377662	P11233	5	31.6	6.2306e-68
IPI00386189	Isoform 1 of NMDA receptor-regulated protein 1	1.25292	0.32529	1.17289	0.230067	1.04382	0.0618742	Q9BXJ9-1	27	38.6	6.9624e-159
IPI00465315	Cytochrome c	1.25199	0.32422	1.14135	0.190745	1.16337	0.218307	P99999	7	56.2	3.3143e-117
IPI00385042	Nucleolar GTP-binding protein 1	1.25164	0.323819	1.12325	0.167679	0.935604	-0.0960294	Q9BZE4	12	24.6	3.3695e-28
IPI00293434	Signal recognition particle 14 kDa protein	1.25141	0.323552	1.31814	0.398501	0.927676	-0.108307	P37108	4	34.6	1.8296e-83
IPI00604620	Nucleolin	1.25118	0.323284	1.16382	0.218873	1.1331	0.18027	P19338	38	44.2	0
IPI00789101	Prostaglandin E synthase 3 (Cytosolic), isoform CRA_c	1.25048	0.322481	1.2198	0.286649	1.01595	0.0228327	B3KUY2	6	40.6	6.8112e-70
IPI00645446	malignant T cell amplified sequence 1 isoform 2	1.25048	0.322481	0.767242	-0.382246	1.50144	0.586348	B4DGY2	2	21.4	2.9921e-32
IPI00783665	Laminin subunit alpha-5	1.25013	0.322079	1.24022	0.310597	1.04795	0.0675742	O15230	61	24.6	0
IPI00442821	CDNA FLJ26613 fis, clone MPB05565, highly similar to Serine/threonine protein phosphatase 2A, 55 kDa regulatory subunit B, alpha isoform	1.25001	0.321945	0.938878	-0.0909899	1.50932	0.5939	Q6ZP32	3	7.8	3.1565e-64
IPI00854642	Isoform 1 of Sister chromatid cohesion protein PDS5 homolog A	1.24885	0.320605	1.0921	0.127101	1.23313	0.30233	Q29RF7-1	37	37.5	0
IPI00423874	Autocrine motility factor receptor, isoform 2	1.24827	0.319934	1.81852	0.862763	0.778214	-0.36176	Q9UKV5	1	3	0.00035605
IPI00017381	Replication factor C subunit 4	1.24653	0.31792	1.01019	0.0146337	1.29656	0.374689	P35249	6	24	6.5816e-37
IPI00007188	ADP/ATP translocase 2	1.24572	0.31698	1.30836	0.38776	1.0073	0.0104984	P05141	23	68.1	0
IPI00031514	Replication factor C subunit 5	1.24491	0.316038	1.10137	0.139296	1.1452	0.195605	P40937	3	16.5	1.1855e-65
IPI00908313	cDNA FLJ60581, highly similar to Rho/Rac guanine nucleotide exchange factor 2	1.24282	0.313615	1.3999	0.485327	0.892495	-0.164084	B4DJ49	15	48.1	1.8293e-88
IPI00793696	19 kDa protein	1.24247	0.313211	1.19691	0.259312	1.059	0.0827086	P83731	5	29.2	2.5901e-40
IPI00027448	ATP synthase subunit g, mitochondrial	1.24235	0.313076	1.34748	0.430268	1.31097	0.39064	O75964	4	44.7	4.0195e-06
IPI00008167	Sodium/potassium-transporting ATPase subunit beta-3	1.24189	0.312537	0.967498	-0.0476693	1.42303	0.508961	P54709	7	33.3	6.3404e-26
IPI00027808	DNA-directed RNA polymerase II subunit RPB2	1.24119	0.311727	0.954338	-0.067427	1.39275	0.477941	P30876	16	17.3	7.4014e-91
IPI00514648	Isoform Long of Probable global transcription activator SNF2L2	1.24096	0.311457	1.30499	0.384041	1.4015	0.486971	P51531-1	26	19.8	7.1902e-194
IPI00024719	Histone acetyltransferase type B catalytic subunit	1.2405	0.310917	0.825111	-0.277339	1.33884	0.420987	O14929	3	10.5	1.0174e-26
IPI00514301	Isoform 1 of Peripheral plasma membrane protein CASK	1.24003	0.310377	1.15472	0.20754	1.13463	0.182227	O14936-1	2	3.7	4.8408e-05
IPI00377245	Isoform 3 of Histone-lysine N-methyltransferase MLL2	1.24003	0.310377	0.901851	-0.149039	0.842379	-0.247458	O14686-3	3	0.7	0.13881
IPI00414676	Heat shock protein HSP 90-beta	1.2398	0.310107	1.22651	0.294563	1.05891	0.0825777	P08238	50	69.9	0
IPI00301364	Isoform 1 of S-phase kinase-associated protein 1	1.23945	0.309702	1.2656	0.339816	0.985489	-0.0210881	P63208-1	3	27	1.4031e-44
IPI00019329	Dynein light chain 1, cytoplasmic	1.23864	0.308756	0.957735	-0.0623023	1.17307	0.230293	P63167	4	57.3	2.3201e-12
IPI00165230	Isoform 1 of DAZ-associated protein 1	1.23829	0.30835	0.868055	-0.204142	1.13857	0.187228	Q96EP5-1	5	21.6	7.9719e-68
IPI00008552	Glutaredoxin-3	1.23713	0.306997	1.13166	0.178438	1.00711	0.0102231	O76003	7	34	4.627e-113
IPI00784651	fatty acid desaturase 1	1.23713	0.306997	0.591347	-0.757923	1.78224	0.833692	O60427	2	7	3.6294e-26
IPI00296053	Isoform Mitochondrial of Fumarate hydratase, mitochondrial	1.23701	0.306862	1.11327	0.1548	1.17567	0.233481	P07954-1	20	57.8	1.4329e-285
IPI00410657	Isoform 2 of mRNA cap guanine-N7 methyltransferase	1.23667	0.306456	0.922528	-0.116335	1.2561	0.328954	O43148-2	7	19.4	8.9669e-21
IPI00297477	U2 small nuclear ribonucleoprotein A	1.2362	0.305914	1.38073	0.465433	0.882943	-0.179609	P09661	7	35.3	2.2087e-138
IPI00328828	Isoform 1 of AT-rich interactive domain-containing protein 4B	1.23469	0.304152	1.18862	0.249292	0.886623	-0.173607	Q4LE39-1	2	1.8	0.0082325
IPI00007346	Peptidyl-prolyl cis-trans isomerase H	1.23458	0.304016	0.75081	-0.413481	1.14645	0.197178	O43447	4	28.2	3.7412e-06
IPI00552149	PHD finger protein 6, isoform CRA_d	1.23434	0.303745	1.44769	0.533756	0.746396	-0.421986	Q5JRC6	2	7.1	0.0011464
IPI00031820	Phenylalanyl-tRNA synthetase alpha chain	1.23423	0.303609	1.45262	0.538661	0.935162	-0.0967112	Q9Y285	15	51	6.628e-98
IPI00885036	Endonuclease/exonuclease/phosphatase family domain-containing protein 1	1.23423	0.303609	1.1124	0.153681	1.10436	0.143214	Q7L9B9	2	7	0.1405
IPI00219649	Isoform 2 of Cystathionine beta-synthase	1.234	0.303338	1.04095	0.057902	1.14117	0.190512	P35520-2	1	1.2	0.0066287
IPI00478410	Isoform Liver of ATP synthase subunit gamma, mitochondrial	1.23388	0.303202	1.27465	0.350098	1.042	0.0593484	P36542-1	10	42.3	1.3702e-64
IPI00789863	19 kDa protein	1.23376	0.303066	0.64378	-0.63536	2.27772	1.18759		1	14.9	3.774e-12
IPI00220766	Lactoylglutathione lyase	1.23365	0.302931	1.39894	0.484338	0.868364	-0.203628	Q04760	6	33.2	4.955e-62
IPI00396131	cDNA FLJ56221, highly similar to YTH domain protein 3	1.23144	0.300349	0.649846	-0.62183	1.61916	0.695247	B4DPX9	4	9	2.5972e-30
IPI00554590	Isoform 1 of Rab3 GTPase-activating protein non-catalytic subunit	1.23051	0.299261	1.30295	0.381784	0.780934	-0.356727	Q9H2M9-1	8	11.1	9.1406e-80
IPI00642984	B-cell receptor-associated protein 31 isoform a	1.22993	0.29858	1.05811	0.0814883	1.23775	0.307717	B3KQ79	11	32.6	2.5733e-140
IPI00294610	Isoform 1 of DnaJ homolog subfamily A member 3, mitochondrial	1.2297	0.298308	1.2655	0.339707	0.935259	-0.0965629	Q96EY1-1	2	8.1	5.3068e-09
IPI00008418	Diablo homolog, mitochondrial precursor	1.229	0.297491	1.46344	0.549365	0.892456	-0.164147	Q9NR28-1	3	16.8	4.6939e-09
IPI00029557	GrpE protein homolog 1, mitochondrial	1.229	0.297491	0.929621	-0.105285	1.55199	0.634119	Q9HAV7	9	52.1	8.6781e-82
IPI00872375	Solute carrier family 2 (Facilitated glucose transporter), member 1 variant (Fragment)	1.22889	0.297354	1.14205	0.191627	1.1083	0.148352	Q59GX2	9	14.5	2.8768e-133
IPI00470537	Isoform 1 of AT-rich interactive domain-containing protein 2	1.22842	0.296809	1.23524	0.304787	0.915491	-0.127382	Q68CP9-1	2	2.3	1.6977e-09
IPI00002894	DNA polymerase delta catalytic subunit	1.22784	0.296127	0.958652	-0.0609209	1.33634	0.418292	P28340	17	22.8	4.1545e-210
IPI00877174	2-5oligoadenylate synthetase 3	1.22784	0.296127	0.859154	-0.219012	0.950442	-0.0733294	A8KA84	4	7.4	1.0452e-21
IPI00001091	AFG3-like protein 2	1.2275	0.295718	1.20162	0.264979	1.05295	0.0744372	Q9Y4W6	17	25.3	3.2954e-92
IPI00396321	Leucine-rich repeat-containing protein 59	1.22726	0.295445	1.01919	0.0274254	1.1454	0.195848	Q96AG4	15	54.4	6.5199e-162
IPI00005102	Isoform 1 of Spermine synthase	1.22715	0.295309	0.934072	-0.0983945	1.26619	0.340497	P52788-1	2	10.4	0.0036362
IPI00013122	Hsp90 co-chaperone Cdc37	1.22692	0.295036	1.17933	0.237962	1.05036	0.0708778	Q16543	10	32.8	1.4518e-72
IPI00172580	Nucleoporin 54kDa variant (Fragment)	1.22668	0.294763	1.27029	0.34516	1.03815	0.0540164	Q53H29	12	29.3	4.2e-199
IPI00007927	Isoform 1 of Structural maintenance of chromosomes protein 2	1.22668	0.294763	1.16896	0.225225	1.18326	0.242767	O95347-1	31	33.8	1.546e-182
IPI00333913	Isoform 1 of Neuroblastoma-amplified sequence	1.22634	0.294353	1.28983	0.367184	0.912349	-0.132343	A2RRP1-1	11	7	1.4392e-85
IPI00012835	C-terminal-binding protein 1	1.22517	0.292987	1.27322	0.348485	1.0271	0.0385763	Q13363	12	37.7	5.8705e-74
IPI00170596	Paired amphipathic helix protein Sin3a	1.22483	0.292577	1.07465	0.103868	1.11983	0.163286	Q96ST3	18	19.3	3.7513e-101
IPI00219097	High mobility group protein B2	1.22459	0.292304	1.01732	0.0247674	1.11753	0.160311	P26583	4	24.4	2.1376e-11
IPI00337667	Isoform 2 of Protein bicaudal D homolog 2	1.22436	0.29203	0.961651	-0.0564148	1.62166	0.697472	Q8TD16-2	4	7.3	5.1699e-07
IPI00328905	Ras GTPase-activating-like protein IQGAP3	1.22355	0.291072	1.50041	0.585361	1.80963	0.855694	Q86VI3	7	5.7	9.3189e-63
IPI00005039	Translation initiation factor IF-2, mitochondrial	1.22262	0.289977	1.17059	0.227234	0.827215	-0.273666	P46199	4	7.3	3.0441e-13
IPI00027252	Prohibitin-2	1.22216	0.289429	1.01399	0.0200407	1.12935	0.175491	Q99623	16	60.2	0
IPI00295889	Signal recognition particle 19 kDa protein	1.22181	0.289018	0.938741	-0.0912003	1.2881	0.365248	P09132	2	18.8	4.7332e-05
IPI00063827	Isoform 1 of Abhydrolase domain-containing protein 14B	1.22169	0.288881	1.20124	0.264519	0.63866	-0.646879	Q96IU4-1	3	21	1.5297e-06
IPI00024709	Inhibitor of nuclear factor kappa-B kinase subunit beta	1.22158	0.288744	1.35423	0.437477	0.994426	-0.00806365	O14920	2	3.2	8.2662e-59
IPI00414860	60S ribosomal protein L37a	1.22158	0.288744	1.18808	0.248627	0.986258	-0.0199631	P61513	3	42.4	1.3816e-20
IPI00742682	Nucleoprotein TPR	1.22146	0.288607	1.2732	0.348454	0.983567	-0.0239045	P12270	119	52.9	0
IPI00003925	Isoform 1 of Pyruvate dehydrogenase E1 component subunit beta, mitochondrial	1.22088	0.287921	1.19287	0.254435	1.07976	0.110713	P11177-1	12	39.8	1.3798e-144
IPI00477535	Isoform 1 of DNA repair protein complementing XP-G cells	1.22018	0.287098	0.797094	-0.327178	1.73544	0.795302	P28715-1	7	12.2	5.1402e-14
IPI00073179	Vacuolar protein sorting-associated protein 33A	1.22007	0.28696	0.88965	-0.168691	1.11945	0.162791	Q96AX1	1	5	0.00012121
IPI00032370	Probable dolichyl pyrophosphate Glc1Man9GlcNAc2 alpha-1,3-glucosyltransferase	1.21867	0.285312	0.729872	-0.454285	1.63348	0.707949	Q9BVK2	4	9.7	2.7541e-06
IPI00418497	Isoform 2 of Mitochondrial import inner membrane translocase subunit TIM50	1.21856	0.285175	0.913846	-0.129976	1.42033	0.506231	Q3ZCQ8-2	9	24.1	9.3162e-70
IPI00927892	Mitochondrial-processing peptidase subunit beta	1.21833	0.2849	1.05822	0.0816377	1.06919	0.0965194	O75439	12	39.9	1.4255e-142
IPI00002520	Serine hydroxymethyltransferase, mitochondrial	1.21763	0.284075	0.994926	-0.00733815	1.34797	0.430791	P34897	22	63.5	0
IPI00375527	inosine monophosphate dehydrogenase 1 isoform a	1.2174	0.2838	0.969265	-0.0450376	1.50711	0.591786	A4D0Z6	4	12.4	1.8319e-23
IPI00911050	cDNA FLJ53329, highly similar to NADPH:adrenodoxin oxidoreductase, mitochondrial	1.21508	0.281046	1.04677	0.0659454	1.17355	0.230884	B4DHX5	23	54.1	8.085e-136
IPI00219160	60S ribosomal protein L34	1.21461	0.280495	1.2616	0.335251	0.908361	-0.138663	P49207	4	23.1	2.3295e-06
IPI00010080	Serine/threonine-protein kinase OSR1	1.21229	0.277735	1.33504	0.416879	1.02364	0.0337087	O95747	9	23.3	4.0858e-101
IPI00005087	Tropomodulin-3	1.21217	0.277597	0.896455	-0.157696	1.29214	0.369761	Q9NYL9	3	18.8	2.1265e-22
IPI00166079	Vitamin K epoxide reductase complex subunit 1-like protein 1	1.21194	0.27732	1.21552	0.281571	0.867317	-0.205369	Q8N0U8	1	6.2	1.2025e-08
IPI00071189	92 kDa protein	1.21043	0.275523	0.919926	-0.12041	0.632693	-0.660423	P21127-1	3	4.9	0.0050964
IPI00032970	Oxysterol-binding protein-related protein 11	1.20962	0.274554	1.43688	0.522935	0.864271	-0.210445	Q9BXB4	2	2.8	0.02372
IPI00440727	Isoform 1 of Bromodomain-containing protein 4	1.2095	0.274416	0.838257	-0.254535	1.24486	0.315982	O60885-1	9	8.9	5.209e-29
IPI00006451	Vesicle-fusing ATPase	1.20939	0.274277	1.11909	0.162322	1.0469	0.0661182	P46459	18	33.3	1.0044e-147
IPI00237884	Isoform 1 of A-kinase anchor protein 12	1.20939	0.274277	0.850595	-0.233455	1.39218	0.477343	Q02952-1	81	65.6	0
IPI00414410	Isoform 1 of 39S ribosomal protein L22, mitochondrial	1.20916	0.274	1.39319	0.478395	0.983952	-0.0233408	Q9NWU5-1	3	16	4.383e-06
IPI00025890	Isoform 1 of N-terminal acetyltransferase B complex subunit MDM20	1.20892	0.273723	0.656501	-0.60713	0.976936	-0.0336635	Q14CX7-1	3	5.8	3.42e-09
IPI00029056	Selenide, water dikinase 1	1.20881	0.273585	1.37868	0.463285	0.851019	-0.232737	P49903	3	14.3	2.5567e-36
IPI00942266	SLC9A3R2 protein (Fragment)	1.208	0.272615	1.03224	0.0457808	1.0912	0.125912	Q6NTG0	9	32.5	1.9687e-37
IPI00465308	Isoform 1 of GPI transamidase component PIG-S	1.208	0.272615	0.85291	-0.229535	1.53479	0.618039	Q96S52-1	3	14.2	7.2334e-28
IPI00219729	Mitochondrial 2-oxoglutarate/malate carrier protein	1.20765	0.272199	1.26862	0.343262	0.929685	-0.105186	Q02978	13	56.1	3.0938e-78
IPI00784154	60 kDa heat shock protein, mitochondrial	1.20765	0.272199	1.08458	0.117135	1.15914	0.213054	P10809	47	80.6	0
IPI00419869	Isoform 1 of Cytochrome c oxidase assembly protein COX15 homolog	1.20765	0.272199	0.682574	-0.550942	1.48568	0.571125	Q7KZN9-1	3	10	2.108e-32
IPI00009368	Sideroflexin-1	1.20591	0.270117	1.19804	0.260682	0.980684	-0.0281394	Q9H9B4	14	58.4	1.4334e-122
IPI00304187	RNA-binding protein 28	1.20591	0.270117	0.691598	-0.531994	1.34836	0.431202	Q9NW13	15	21.3	3.0572e-78
IPI00297572	Intron-binding protein aquarius	1.20579	0.269978	0.963623	-0.0534596	1.21699	0.283318	O60306	18	19.2	7.029e-144
IPI00873223	cDNA FLJ56155, highly similar to UTP--glucose-1-phosphate uridylyltransferase 2	1.20579	0.269978	0.836641	-0.257319	1.4902	0.575504	B2RAN1	3	9.9	0.27202
IPI00290279	Isoform Long of Adenosine kinase	1.20475	0.268728	1.391	0.476124	0.891899	-0.165048	P55263-1	3	13.5	2.7599e-24
IPI00017334	Prohibitin	1.20451	0.26845	1.11837	0.161404	1.13732	0.185644	P35232	18	81.6	7.6777e-298
IPI00828080	Isoform 6 of Arf-GAP with Rho-GAP domain, ANK repeat and PH domain-containing protein 1	1.20405	0.267894	1.54108	0.623946	0.734807	-0.444563	Q96P48-6	3	3	1.3911e-11
IPI00375677	Mitochondrial ribosomal protein L21 isoform d	1.203	0.266641	0.97733	-0.0330821	1.05535	0.0777252	Q7Z2W9	2	13.9	0.00059281
IPI00307359	oxysterol binding protein-like 9 isoform f	1.20277	0.266363	1.45153	0.537572	0.552941	-0.854804	B1AKJ7	3	6.6	2.4675e-30
IPI00867509	Coronin-1C_i3 protein	1.20266	0.266224	0.88917	-0.169468	1.26514	0.339292	A7MAP0	13	29.2	5.4242e-71
IPI00410162	elongin B isoform b	1.20184	0.265249	0.977385	-0.0330012	1.04863	0.0684999	B7WPD3	5	28	1.0932e-26
IPI00012011	Cofilin-1	1.20173	0.265109	1.19703	0.259461	0.982991	-0.0247505	P23528	16	83.1	0
IPI00943181	Putative uncharacterized protein PSME2	1.2015	0.264831	1.47823	0.563871	0.888007	-0.171357	C9JE52	6	36.6	2.0732e-105
IPI00023555	Isoform 1a of Oxysterol-binding protein-related protein 3	1.2008	0.263994	1.1353	0.183074	1.05151	0.0724608	Q9H4L5-1	7	10.3	8.2373e-50
IPI00029534	Amidophosphoribosyltransferase	1.19987	0.262878	1.72499	0.786588	0.741476	-0.431528	Q06203	4	15.9	1.2731e-12
IPI00296337	Isoform 1 of DNA-dependent protein kinase catalytic subunit	1.19952	0.262459	1.13876	0.18747	1.09235	0.127436	P78527-1	237	65.7	0
IPI00815707	Isoform 4 of Ankyrin repeat and KH domain-containing protein 1	1.19848	0.261202	1.02108	0.0300979	0.946473	-0.0793665	Q8IWZ3-4	2	1.3	7.7978e-41
IPI00329512	Isoform SM-B1 of Small nuclear ribonucleoprotein-associated proteins B and B	1.1979	0.260504	1.18598	0.24608	1.28416	0.360828	P14678-3	4	15.6	2.0999e-12
IPI00788907	Isoform 1 of Serine/threonine-protein phosphatase PGAM5, mitochondrial	1.19766	0.260224	1.09538	0.131436	1.31933	0.399811	Q96HS1-1	6	22.1	6.0258e-20
IPI00221222	Activated RNA polymerase II transcriptional coactivator p15	1.19732	0.259804	1.04302	0.0607649	1.46829	0.554135	P53999	3	22.8	1.71e-15
IPI00005822	Isoform 1 of Cell division cycle protein 23 homolog	1.1972	0.259665	0.932429	-0.100935	0.577215	-0.792819	Q9UJX2-1	2	8.2	9.3963e-08
IPI00418313	interleukin enhancer binding factor 3 isoform d	1.19639	0.258685	1.11862	0.161722	1.08505	0.117758	Q12906-4	27	41.1	8.9942e-277
IPI00952583	Putative uncharacterized protein MDH1	1.19558	0.257705	1.88589	0.915246	0.592053	-0.756203	C9JF79	5	35.1	5.8249e-122
IPI00046828	Coiled-coil domain-containing protein 58	1.19534	0.257425	1.15422	0.206924	1.14319	0.193061	Q4VC31	2	25.7	1.1608e-26
IPI00152981	Acyl-CoA dehydrogenase family member 9, mitochondrial	1.19499	0.257004	1.0693	0.0966623	1.06765	0.0944432	Q9H845	19	43	4.0176e-183
IPI00022810	Dipeptidyl-peptidase 1	1.19488	0.256864	0.787892	-0.34393	1.79137	0.841064	P53634	7	20.7	9.7039e-22
IPI00783982	Coatomer subunit gamma	1.1943	0.256163	1.25375	0.32625	0.839967	-0.251595	Q9Y678	31	49.2	3.3145e-218
IPI00179953	Isoform 1 of Nuclear autoantigenic sperm protein	1.19418	0.256023	0.947204	-0.0782528	1.31232	0.392119	P49321-1	34	73.1	0
IPI00419237	Isoform 1 of Cytosol aminopeptidase	1.19291	0.25448	1.08425	0.116698	1.08389	0.116224	P28838-1	17	48.4	5.8986e-113
IPI00329482	Isoform 1 of Laminin subunit alpha-4	1.19291	0.25448	0.499558	-1.00127	2.399	1.26243	Q16363-1	10	9.9	2.8796e-113
IPI00021700	Proliferating cell nuclear antigen	1.19233	0.253778	0.92298	-0.115629	1.13146	0.178189	P12004	14	72	2.5068e-184
IPI00411886	Nucleolar complex protein 2 homolog	1.19209	0.253497	1.06715	0.0937587	1.11743	0.160187	Q9Y3T9	15	26	1.803e-65
IPI00217018	Sterile alpha motif domain-containing protein 9	1.1914	0.252654	1.13839	0.187001	0.871286	-0.198782	Q5K651	7	6.2	1.3196e-08
IPI00023598	Tubulin beta-4 chain	1.19116	0.252372	1.4314	0.517425	0.85346	-0.228605	P04350	21	65.5	0
IPI00150269	Isoform 1 of U4/U6 small nuclear ribonucleoprotein Prp4	1.19116	0.252372	0.848911	-0.236315	1.31655	0.39676	O43172-1	16	36.4	1.8873e-56
IPI00010590	Isoform 1 of Lymphoid-specific helicase	1.19093	0.252091	0.566534	-0.819765	2.22285	1.15241	Q9NRZ9-1	2	2	0.19963
IPI00215997	CD9 antigen	1.19082	0.251951	0.85458	-0.226712	1.58101	0.660847	P21926	2	7.5	0.018499
IPI00289601	Isoform 2 of Histone deacetylase 2	1.1907	0.25181	0.821811	-0.283121	1.37382	0.458196	Q92769-2	13	25.6	6.4601e-142
IPI00292787	Actin-related protein 5	1.19058	0.251669	0.899208	-0.153274	0.964732	-0.0518	Q9H9F9	2	6.1	4.8758e-13
IPI00291939	Structural maintenance of chromosomes protein 1A	1.19012	0.251107	0.88702	-0.172961	1.25091	0.322981	Q14683	15	15.1	1.5768e-109
IPI00031169	Ras-related protein Rab-2A	1.18989	0.250825	1.05864	0.0822163	1.18115	0.240187	P61019	10	56.6	1.4928e-96
IPI00816452	Isoform 3 of Myosin-VI	1.18977	0.250684	1.46426	0.550175	0.767423	-0.381907	Q9UM54-3	5	5.2	7.3586e-99
IPI00871870	Putative uncharacterized protein ARPC3 (Fragment)	1.18873	0.249417	1.26223	0.335971	0.863742	-0.211328	A8MYY8	2	13.5	1.5182e-16
IPI00216247	Proteasome (Prosome, macropain) 26S subunit, non-ATPase, 4, isoform CRA_b	1.18873	0.249417	1.06845	0.0955164	1.03777	0.0534821	P55036-2	8	24.7	6.342e-117
IPI00026781	Fatty acid synthase	1.18791	0.248431	0.93996	-0.0893285	1.25274	0.325086	P49327	121	68.9	0
IPI00169383	Phosphoglycerate kinase 1	1.18768	0.248149	1.35819	0.441687	0.965116	-0.0512253	P00558	34	79.9	0
IPI00409607	Isoform 1 of Calmodulin-regulated spectrin-associated protein 2	1.18664	0.246879	2.21084	1.1446	0.608495	-0.716682	Q08AD1-1	2	2.4	2.3833e-10
IPI00024466	Isoform 1 of UDP-glucose:glycoprotein glucosyltransferase 1	1.18524	0.245185	1.1026	0.140909	1.09985	0.137302	Q9NYU2-1	65	61.2	0
IPI00009032	Lupus La protein	1.18513	0.245043	1.13544	0.183248	1.08053	0.11174	P05455	17	52.5	6.8952e-292
IPI00853598	cDNA FLJ56334, highly similar to SEC13-related protein	1.18478	0.244619	1.56491	0.646081	0.821747	-0.283234	B4DXJ1	3	15.8	1.7948e-43
IPI00514506	39S ribosomal protein L24, mitochondrial	1.18455	0.244337	1.38059	0.46529	0.972708	-0.0399212	Q96A35	1	6	1.0035e-06
IPI00879750	Putative uncharacterized protein SNRPD3	1.18443	0.244195	1.36283	0.44661	0.733106	-0.447906	C9JQC3	3	22.9	3.5278e-28
IPI00470596	Isoform 1 of Zinc finger protein 638	1.18385	0.243488	1.17755	0.235782	1.05583	0.0783819	Q14966-1	14	11.5	1.1618e-103
IPI00145593	Nucleolar MIF4G domain-containing protein 1	1.18374	0.243347	1.18265	0.242027	1.04123	0.0582835	Q5C9Z4	3	5.6	9.939e-11
IPI00514622	Ran-binding protein 6	1.18362	0.243205	0.950751	-0.0728609	0.997213	-0.00402619	O60518	5	5.2	4.9798e-29
IPI00796864	Dolichyl-phosphate mannosyltransferase polypeptide 1, catalytic subunit	1.1835	0.243064	1.33078	0.412269	0.886181	-0.174327	Q5QPK0	8	37.6	9.9112e-132
IPI00328715	Protein LYRIC	1.1835	0.243064	1.25033	0.322305	0.960504	-0.0581371	Q86UE4	7	16.5	8.2637e-95
IPI00181617	Isoform 1 of RNA-binding protein 34	1.18269	0.242073	0.838463	-0.254181	0.80147	-0.319279	P42696-1	2	5.1	1.3142e-22
IPI00003865	Isoform 1 of Heat shock cognate 71 kDa protein	1.18223	0.241507	1.09579	0.131977	1.09235	0.127436	P11142-1	41	75.4	0
IPI00004459	Probable dimethyladenosine transferase	1.18199	0.241223	0.767009	-0.382684	1.39919	0.484595	Q9UNQ2	6	29.1	8.7569e-35
IPI00029601	Src substrate cortactin	1.18176	0.24094	1.28694	0.363949	0.909475	-0.136894	Q14247	10	28.7	8.1325e-118
IPI00103064	Isoform 3 of Exocyst complex component 7	1.18165	0.240798	0.774541	-0.368587	1.72958	0.790421	Q9UPT5-3	2	6.3	3.6128e-05
IPI00007694	Isoform 1 of Protein phosphatase methylesterase 1	1.18107	0.240089	1.56053	0.642036	0.863569	-0.211616	Q9Y570-1	6	19.7	1.6129e-21
IPI00007765	Stress-70 protein, mitochondrial	1.18095	0.239948	1.0745	0.103666	1.13069	0.177208	P38646	39	66.3	0
IPI00028357	Exportin-4	1.18083	0.239806	1.16485	0.220146	0.997309	-0.00388717	Q9C0E2	2	2.4	1.1651e-07
IPI00003128	Isoform IIb of Prolyl 4-hydroxylase subunit alpha-2	1.18049	0.23938	1.00436	0.00627853	1.28791	0.365033	O15460-1	5	12.7	1.3758e-09
IPI00106495	Condensin complex subunit 3	1.17921	0.237819	1.45262	0.538661	0.876965	-0.189408	Q9BPX3	13	16.9	1.2549e-95
IPI00216298	Thioredoxin	1.17909	0.237677	1.26939	0.344134	1.02662	0.0379012	P10599	5	42.9	2.3201e-22
IPI00017341	SF3A2 protein (Fragment)	1.17874	0.237251	1.02546	0.0362759	1.17884	0.237367	Q15428	10	27.9	1.8997e-97
IPI00375531	Isoform 2 of Nucleoside diphosphate kinase A	1.17863	0.237109	1.15129	0.203257	0.892898	-0.163432	P15531-2	9	56.5	1.4811e-76
IPI00304866	Tumor necrosis factor, alpha-induced protein 2	1.17863	0.237109	0.907095	-0.140674	1.39323	0.478438	Q03169	2	4.4	0.0027399
IPI00329625	cDNA FLJ56153, highly similar to Homo sapiens transforming growth factor beta regulator 4 (TBRG4), transcript variant 1, mRNA	1.17828	0.236682	0.769543	-0.377927	1.52787	0.61152	B4DU42	14	39.9	5.4506e-102
IPI00477313	Isoform C2 of Heterogeneous nuclear ribonucleoproteins C1/C2	1.17805	0.236398	1.20125	0.264535	1.13204	0.178924	P07910-1	3	12.7	5.0659e-25
IPI00005578	EH domain-containing protein 4	1.17712	0.23526	1.22054	0.287523	1.07919	0.109942	Q9H223	18	37.3	4.7101e-245
IPI00216691	Profilin-1	1.17677	0.234834	1.38484	0.469719	0.915818	-0.126867	P07737	10	87.9	6.7216e-164
IPI00382470	Isoform 2 of Heat shock protein HSP 90-alpha	1.17619	0.234122	1.16953	0.225934	1.0149	0.0213308	P07900-2	45	52.1	0
IPI00009885	FK506-binding protein 11	1.17515	0.23284	1.06245	0.0873949	0.810513	-0.303092	Q9NYL4	3	21.4	1.3224e-05
IPI00556369	411 kDa protein	1.17457	0.232127	1.09568	0.131832	1.00817	0.0117366	Q96Q15-1	8	4	1.1556e-40
IPI00099550	Isoform 1 of Ubiquilin-1	1.17445	0.231985	0.943986	-0.0831625	1.33577	0.417669	Q9UMX0-1	11	38	5.4831e-193
IPI00292000	Isoform 1 of U4/U6 small nuclear ribonucleoprotein Prp31	1.17387	0.231272	1.07613	0.105852	1.03325	0.0471894	Q8WWY3-1	14	43.3	2.038e-132
IPI00420014	Isoform 1 of U5 small nuclear ribonucleoprotein 200 kDa helicase	1.17387	0.231272	1.03235	0.0459339	1.13934	0.188202	O75643-1	96	59.9	0
IPI00028031	cDNA FLJ56425, highly similar to Very-long-chain specific acyl-CoAdehydrogenase, mitochondrial	1.17352	0.230844	1.06318	0.08838	1.07861	0.109171	B4DEA8	28	49.4	0
IPI00299413	GA-binding protein alpha chain	1.17329	0.230558	0.692283	-0.530566	1.19383	0.255598	Q06546	2	4.4	0.17975
IPI00552413	Isoform 2 of Cell division protein kinase 9	1.17282	0.229987	1.18658	0.246813	0.846627	-0.240202	P50750-2	6	14.3	4.7704e-26
IPI00025366	Citrate synthase, mitochondrial	1.17271	0.229844	1.04132	0.0584143	1.32068	0.401281	O75390	19	50.2	4.6112e-106
IPI00220219	Coatomer subunit beta	1.17259	0.229701	1.35729	0.440727	0.877119	-0.189156	P35606	25	41.3	1.417e-232
IPI00913938	Ran binding protein 11 isoform 1	1.17236	0.229416	1.02423	0.034541	0.880204	-0.184091	B4DZ73	6	12.7	2.4047e-76
IPI00028481	Ras-related protein Rab-8A	1.1719	0.228844	1.00751	0.0107956	1.15472	0.207541	P61006	7	34.3	7.923e-66
IPI00477759	Integrator complex subunit 2	1.17143	0.228273	0.844392	-0.244015	1.67663	0.745563	Q9H0H0	2	3.8	3.8369e-41
IPI00746351	Isoform 1 of Exosome complex exonuclease RRP44	1.16934	0.225697	1.04832	0.0680765	1.06467	0.0904121	Q9Y2L1-1	25	37.4	5.7541e-228
IPI00220642	14-3-3 protein gamma	1.16853	0.224694	1.40921	0.494891	0.858937	-0.219376	P61981	15	67.6	0
IPI00440493	ATP synthase subunit alpha, mitochondrial	1.16853	0.224694	1.23122	0.300094	1.04536	0.0639977	P25705	32	64.4	0
IPI00942405	R30783_1	1.16795	0.223978	1.04358	0.0615413	1.08457	0.117119	O75243	2	17.2	3.8054e-51
IPI00185374	26S proteasome non-ATPase regulatory subunit 12	1.16772	0.223691	1.19921	0.262083	1.04795	0.0675742	O00232	19	46.9	4.1839e-275
IPI00294536	cDNA FLJ51909, highly similar to Serine-threonine kinase receptor-associatedprotein	1.16772	0.223691	0.983643	-0.0237934	1.09004	0.124387	B4DNJ6	13	49.9	4.7589e-88
IPI00012202	Methylosome protein 50	1.16748	0.223404	1.43838	0.524447	0.883365	-0.178918	Q9BQA1	2	6.4	8.3539e-07
IPI00006176	Isoform 1 of Hepatocyte growth factor-regulated tyrosine kinase substrate	1.16702	0.22283	1.07158	0.0997444	1.01307	0.018733	O14964-1	7	14.7	4.7069e-12
IPI00026516	Succinyl-CoA:3-ketoacid-coenzyme A transferase 1, mitochondrial	1.16656	0.222256	1.02582	0.0367768	1.14597	0.196574	P55809	12	38.5	0
IPI00029266	Small nuclear ribonucleoprotein E	1.16621	0.221825	0.997939	-0.00297631	1.23477	0.30424	P62304	1	12	0.00093036
IPI00157790	KIAA0368 protein	1.16609	0.221682	1.05558	0.0780301	1.01855	0.0265125	Q5VYK3	53	35.5	0
IPI00220373	Insulin-degrading enzyme	1.16598	0.221538	1.29308	0.37081	0.983087	-0.0246095	P14735	4	5.2	6.8351e-06
IPI00299084	Transmembrane protein 33	1.16586	0.221394	1.15465	0.207455	1.01816	0.025968	P57088	9	38.9	9.0605e-98
IPI00298520	Coatomer subunit delta variant 2	1.16435	0.219526	1.34669	0.429417	1.03738	0.0529476	B0YIW6	17	37.3	4.0347e-100
IPI00220628	Isoform 6 of A-kinase anchor protein 9	1.164	0.219094	1.00811	0.0116581	1.01739	0.0248782	Q99996-6	14	5.1	1.3384e-72
IPI00000816	14-3-3 protein epsilon	1.16377	0.218807	1.4136	0.49937	0.838314	-0.254437	P62258	20	70.6	0
IPI00022305	Basic leucine zipper and W2 domain-containing protein 2	1.16296	0.217799	1.10434	0.143183	0.895358	-0.159463	Q9Y6E2	6	20.3	5.7207e-11
IPI00658155	26 kDa protein	1.16215	0.216791	0.815731	-0.293834	1.22506	0.292855	P82930	4	25.3	4.923e-05
IPI00003627	Isoform 1 of Actin-like protein 6A	1.16203	0.216647	1.10776	0.147648	1.14703	0.197904	O96019-1	13	43.1	4.6631e-96
IPI00645948	High-mobility group box 1	1.16191	0.216503	0.898016	-0.155186	1.27667	0.352383	Q5T7C6	10	43.5	6.0954e-147
IPI00005537	cDNA FLJ60124, highly similar to Mitochondrial dicarboxylate carrier	1.16168	0.216214	1.047	0.0662662	1.31578	0.395918	P52815	5	24	2.1728e-32
IPI00794659	ribosomal protein S20 isoform 1	1.16157	0.21607	0.91286	-0.131534	1.23775	0.307717	B4DW28	3	21.1	3.3704e-07
IPI00017669	Isoform 1 of SWI/SNF-related matrix-associated actin-dependent regulator of chromatin subfamily E member 1	1.16122	0.215638	1.2609	0.334452	0.885989	-0.17464	Q969G3-1	7	20.2	1.2135e-29
IPI00335385	Scavenger mRNA-decapping enzyme DcpS	1.16122	0.215638	1.12096	0.164739	1.12397	0.1686	Q96C86	4	25.2	1.2995e-13
IPI00003419	Small acidic protein	1.16098	0.215349	1.24979	0.321689	1.13934	0.188202	O00193	2	12.6	2.7496e-50
IPI00930694	insulin-like growth factor 2 mRNA binding protein 1 isoform 2	1.16087	0.215205	1.42263	0.508565	0.761263	-0.393534	C9JT33	10	29.2	1.9423e-83
IPI00894544	Putative uncharacterized protein THADA	1.16058	0.214844	1.2695	0.344258	0.730742	-0.452566	C9JER1	2	1.7	1.4226e-14
IPI00748360	Uncharacterized protein KIAA1797	1.16023	0.214411	1.20878	0.273552	1.01797	0.0256956	Q5VW36	3	2.8	2.3502e-14
IPI00027107	Tu translation elongation factor, mitochondrial precursor	1.15935	0.213314	1.19748	0.260005	1.07861	0.109171	P49411	29	69	0
IPI00329025	Protein jagunal homolog 1	1.1593	0.213256	1.66707	0.737311	0.817942	-0.28993	Q8N5M9	1	6.6	6.7355e-10
IPI00640703	Isoform 1 of Exportin-5	1.15922	0.213155	1.25897	0.332241	0.909735	-0.136482	Q9HAV4-1	23	29.9	8.0499e-258
IPI00029764	Splicing factor 3A subunit 3	1.15883	0.212664	1.20371	0.267492	0.924841	-0.112722	Q12874	21	53.3	0
IPI00795030	LASS6 protein	1.15876	0.212577	1.10556	0.144774	1.10225	0.14045	Q32M63	1	2.8	0.00020748
IPI00456429	ubiquitin and ribosomal protein L40 precursor	1.15869	0.21249	1.0782	0.108622	1.19508	0.257107	P62987	8	49.2	1.3091e-60
IPI00852662	Isoform 1 of Protein FAM135B	1.15841	0.212143	0.709441	-0.495245	1.7216	0.783752	Q49AJ0-1	2	1.1	0.15879
IPI00033907	Anaphase-promoting complex subunit 1	1.15743	0.210929	0.897702	-0.155692	1.29416	0.372013	Q9H1A4	2	1.4	2.9616e-10
IPI00010187	Elongation of very long chain fatty acids protein 1	1.15742	0.210914	0.776335	-0.365249	1.59225	0.671071	Q9BW60	4	17.2	3.0818e-69
IPI00219005	FK506-binding protein 4	1.15689	0.210248	1.36055	0.444187	0.985297	-0.0213695	Q02790	28	74.3	0
IPI00025616	DNA polymerase delta subunit 2	1.15638	0.209611	1.12359	0.168118	1.16673	0.222472	P49005	2	6	8.0016e-18
IPI00384456	Isoform GTBP-N of DNA mismatch repair protein Msh6	1.15616	0.209336	0.97744	-0.0329204	1.24323	0.314087	P52701-1	32	33.2	1.5817e-274
IPI00025091	40S ribosomal protein S11	1.15611	0.209278	1.17272	0.229865	1.12839	0.174263	P62280	9	46.2	1.7103e-47
IPI00420108	Dihydrolipoyllysine-residue succinyltransferase component of 2-oxoglutarate dehydrogenase complex, mitochondrial	1.15541	0.208409	1.21111	0.276328	1.07303	0.101697	P36957	7	19.4	5.1609e-154
IPI00215901	Isoform 1 of Adenylate kinase 2, mitochondrial	1.15524	0.208191	1.1463	0.19698	1.02816	0.0400603	P54819-1	13	74.1	1.2289e-267
IPI00026496	Nucleoplasmin-3	1.15523	0.208177	0.92335	-0.115051	1.23429	0.303679	O75607	2	17.4	4.0504e-21
IPI00062599	71 kDa protein	1.15517	0.208104	1.03914	0.0553947	1.17086	0.227572	Q96GM5-1	7	17.4	6.3956e-83
IPI00027445	Probable histidyl-tRNA synthetase, mitochondrial	1.15503	0.20793	0.932059	-0.101507	1.27974	0.355854	P49590	10	26.1	1.6721e-81
IPI00217686	Putative rRNA methyltransferase 3	1.155	0.207887	1.00598	0.00859773	1.03805	0.0538828	Q8IY81	23	43	6.7391e-284
IPI00013788	HIV Tat-specific factor 1	1.15481	0.207655	0.838312	-0.254441	1.13338	0.180637	O43719	10	18	5.8861e-93
IPI00017412	Isoform 1 of Replication factor C subunit 2	1.15414	0.206814	0.906082	-0.142286	0.974053	-0.0379272	P35250-1	3	12.4	3.0563e-54
IPI00292134	Isoform 1 of Epidermal growth factor receptor substrate 15	1.15411	0.206785	1.3303	0.411749	0.910926	-0.134594	P42566-1	2	3.2	0.0023432
IPI00217357	Isoform 1 of Cell division cycle and apoptosis regulator protein 1	1.15411	0.206785	1.15613	0.209301	1.04632	0.0653234	Q8IX12-1	13	15.9	4.0737e-57
IPI00020416	Tripeptidyl-peptidase 2	1.15371	0.206277	0.915599	-0.127212	1.21084	0.276008	P29144	42	45.6	0
IPI00294787	Helicase ARIP4	1.15351	0.20603	1.02303	0.0328427	1.12377	0.168353	Q9Y4B4	2	2.8	5.9895e-20
IPI00043598	Isoform 4 of Inhibitor of nuclear factor kappa-B kinase-interacting protein	1.1535	0.206015	0.963815	-0.0531726	1.21853	0.285139	Q70UQ0-4	12	37.1	2.5467e-113
IPI00465059	Isoform 1 of Mitochondrial Rho GTPase 2	1.15323	0.205681	1.05755	0.0807226	1.26321	0.337099	Q8IXI1-1	11	33.3	1.3473e-84
IPI00007928	Pre-mRNA-processing-splicing factor 8	1.15288	0.205246	1.04614	0.065077	1.1011	0.13894	Q6P2Q9	109	57.7	0
IPI00216003	Cullin-5	1.15272	0.205042	1.15579	0.208874	0.978186	-0.0318198	Q93034	2	5.7	6.0493e-17
IPI00303439	cDNA FLJ13963 fis, clone Y79AA1001299, highly similar to Homo sapiens integrase interactor 1b protein	1.15086	0.202716	1.0943	0.13001	1.12791	0.173648	Q9H836	7	29.4	3.8301e-109
IPI00303207	ATP-binding cassette sub-family E member 1	1.1508	0.202643	1.03323	0.0471582	1.07294	0.101568	P61221	16	39.4	5.9188e-255
IPI00790739	Aconitase 2, mitochondrial	1.15077	0.2026	1.10523	0.144345	1.04863	0.0684999	A2A274	23	41.2	3.4205e-196
IPI00221106	splicing factor 3B subunit 2	1.15022	0.201916	1.01028	0.014751	1.19076	0.251877	Q13435	35	46.4	3.8974e-184
IPI00334713	Isoform 3 of Heterogeneous nuclear ribonucleoprotein A/B	1.14988	0.201479	0.928307	-0.107326	1.25495	0.327629	Q99729-3	8	34	4.7286e-82
IPI00556451	Isoform 2 of Electron transfer flavoprotein subunit beta	1.14959	0.201115	1.09008	0.124439	1.05929	0.0831013	P38117-2	15	41	2.082e-129
IPI00793381	Putative uncharacterized protein PSMD6	1.14954	0.201056	1.19335	0.255014	0.971939	-0.0410619	C9IZE4	17	43	1.4895e-135
IPI00646779	TUBB6 protein	1.14939	0.200867	0.991024	-0.0130084	1.20901	0.273831	Q9BUF5	17	48.8	0
IPI00006211	Isoform 1 of Vesicle-associated membrane protein-associated protein B/C	1.14932	0.20078	1.45591	0.541921	0.816058	-0.293256	O95292-1	4	25.1	1.1325e-24
IPI00470883	stromal antigen 2 isoform a	1.14926	0.200707	0.626526	-0.674554	2.07957	1.05628	B1AMT5	2	3.2	0.021108
IPI00159770	Glucocorticoid modulatory element-binding protein 2	1.14898	0.200357	1.33123	0.412759	0.639045	-0.646011	Q9UKD1	1	4	8.2362e-31
IPI00221325	E3 SUMO-protein ligase RanBP2	1.14829	0.199482	1.16392	0.218992	0.941428	-0.0870773	P49792	88	42.6	0
IPI00001639	Importin subunit beta-1	1.14811	0.199263	1.23246	0.301537	0.963867	-0.053094	Q14974	36	60.6	0
IPI00025815	TDP43	1.14793	0.19903	0.912874	-0.131512	1.28743	0.364494	Q13148	15	45.7	1.1827e-132
IPI00550364	Phosphoglucomutase-2	1.14791	0.199015	1.29149	0.369037	0.853075	-0.229255	Q96G03	12	27.8	9.7869e-73
IPI00017592	Isoform 1 of LETM1 and EF-hand domain-containing protein 1, mitochondrial	1.14776	0.198826	1.08079	0.112081	1.14453	0.194758	O95202-1	25	50.3	0
IPI00007941	Protein HEXIM1	1.14769	0.198738	0.832328	-0.264776	1.14569	0.196211	O94992	2	7	0.00019657
IPI00178440	Elongation factor 1-beta	1.14755	0.198563	1.19114	0.252347	1.05641	0.0791695	P24534	6	43.6	9.142e-190
IPI00302829	Retinoblastoma-associated protein	1.14724	0.198169	1.01232	0.0176618	1.28407	0.36072	P06400	2	3.3	1.7866e-14
IPI00654820	ATP synthase subunit a	1.14693	0.197775	1.10991	0.150445	1.05535	0.0777252	P00846	1	4.2	3.6544e-07
IPI00007611	ATP synthase subunit O, mitochondrial	1.14688	0.197717	1.04195	0.0592868	1.11099	0.151851	P48047	8	54.5	2.6331e-63
IPI00291510	Inosine-5-monophosphate dehydrogenase 2	1.14658	0.197337	1.20519	0.269264	0.98472	-0.022214	P12268	26	66.9	0
IPI00028911	Dystroglycan	1.14624	0.196913	0.441182	-1.18055	2.2686	1.1818	Q14118	2	4.8	0.073667
IPI00306301	Mitochondrial PDHA1	1.14619	0.19684	1.2081	0.272735	1.01028	0.0147588	A5YVE9	16	39.5	2.4507e-67
IPI00007675	Cytoplasmic dynein 1 light intermediate chain 1	1.14616	0.196811	1.06348	0.0887888	0.907544	-0.139961	Q9Y6G9	8	22.6	2.6826e-88
IPI00031493	Protein YIPF2	1.14616	0.196811	0.805968	-0.311206	1.55497	0.636885	Q9BWQ6	1	9.2	5.2612e-25
IPI00184533	Ubiquitin carboxyl-terminal hydrolase 11	1.14595	0.196548	0.72664	-0.460687	1.66394	0.734607	P51784	6	10.3	4.0253e-12
IPI00455473	Isoform 1 of Melanoma inhibitory activity protein 3	1.14556	0.196051	1.1551	0.208019	1.03844	0.054417	Q5JRA6-1	31	24.1	0
IPI00010720	T-complex protein 1 subunit epsilon	1.14556	0.196051	1.03656	0.051797	1.14713	0.198025	P48643	39	79.3	0
IPI00019141	1-acyl-sn-glycerol-3-phosphate acyltransferase alpha	1.14522	0.195627	1.39018	0.475272	0.841466	-0.249022	Q99943	1	7.4	5.5943e-16
IPI00219445	Isoform 2 of Proteasome activator complex subunit 3	1.14486	0.195174	0.898003	-0.155208	1.3596	0.443183	P61289-2	11	52.4	1.3246e-153
IPI00017303	DNA mismatch repair protein Msh2	1.14485	0.195159	0.953092	-0.0693121	1.10917	0.149478	P43246	32	48.6	0
IPI00385267	Signal recognition particle receptor subunit alpha	1.14457	0.194808	1.0718	0.100039	1.04766	0.0671772	P08240	24	47.2	8.8702e-212
IPI00954006	Putative uncharacterized protein DKFZp667H197 (Fragment)	1.14436	0.194545	0.973044	-0.039423	1.23794	0.307941	Q69YJ7	12	17.5	1.4414e-69
IPI00172594	39S ribosomal protein L28, mitochondrial	1.14411	0.194223	1.105	0.144041	1.06679	0.093274	Q13084	4	29.3	4.6694e-37
IPI00333143	Isoform 1 of Diacylglycerol kinase alpha	1.144	0.194091	0.753233	-0.408831	1.0789	0.109557	P23743-1	2	5.4	1.8218e-32
IPI00009946	Mitochondrial import receptor subunit TOM34	1.14367	0.193666	0.942863	-0.0848796	0.818624	-0.288727	Q15785	4	17.2	7.9943e-58
IPI00305304	LAG1 longevity assurance homolog 2	1.14362	0.193608	1.09429	0.129992	1.26821	0.342794	Q96G23	5	16.3	1.1776e-46
IPI00798041	cDNA FLJ58665, highly similar to Serine/threonine-protein phosphatase 2A 55 kDa regulatory subunit B alpha isoform	1.14302	0.192846	1.1263	0.171596	0.953239	-0.0690908	B4E1T7	7	18.8	1.7318e-84
IPI00465436	Catalase	1.14289	0.192685	0.851006	-0.232759	1.35518	0.438484	P04040	20	55.4	6.378e-122
IPI00171459	Inactive hydroxysteroid dehydrogenase-like protein 1	1.14275	0.192509	1.23884	0.308987	0.872564	-0.196667	Q3SXM5	2	10.9	2.2163e-07
IPI00026625	Isoform 1 of Nuclear pore complex protein Nup155	1.14254	0.192245	1.02649	0.0377201	1.02547	0.0362798	O75694-1	36	36.3	0
IPI00179298	482 kDa protein	1.14224	0.191864	1.1922	0.253623	0.938276	-0.0919157	Q7Z6Z7-1	89	32.7	0
IPI00015842	Reticulocalbin-1	1.1422	0.19182	1.4592	0.545174	0.811003	-0.30222	Q15293	15	58.9	2.9436e-205
IPI00411291	Peroxisome biogenesis factor 1	1.14176	0.191263	1.10593	0.145257	0.860062	-0.217488	O43933	3	5.1	1.4381e-78
IPI00643342	Phosphoprotein enriched in astrocytes 15, isoform CRA_b	1.14166	0.191131	2.02269	1.01628	0.552451	-0.856083	B1AKZ3	2	27.8	1.2139e-18
IPI00783302	Isoform 1 of Pentatricopeptide repeat-containing protein 3, mitochondrial	1.14139	0.190793	0.976002	-0.0350442	1.00269	0.00387673	Q96EY7-1	17	36.3	1.5205e-169
IPI00100656	Isoform 1 of Trans-2,3-enoyl-CoA reductase	1.14128	0.190647	1.0947	0.130534	1.19297	0.254552	Q9NZ01-1	12	32.1	1.0904e-21
IPI00010746	Phosphatidylserine synthase 1	1.14123	0.190588	0.841188	-0.2495	1.41659	0.502419	P48651	5	14.6	4.7706e-47
IPI00032304	Plastin-1	1.14122	0.190573	1.24123	0.311776	0.792802	-0.334967	Q14651	9	23.4	6.2846e-96
IPI00604773	PODXL protein	1.14087	0.190133	0.744853	-0.424973	1.51518	0.599493	O00592-1	13	25.2	5.3279e-114
IPI00216951	Aspartyl-tRNA synthetase, cytoplasmic	1.14071	0.189928	1.26116	0.33475	0.928589	-0.106887	P14868	23	56.3	8.1495e-204
IPI00241860	Mitochondrial intermediate peptidase	1.14018	0.189267	0.529862	-0.91631	2.43955	1.28662	Q99797	1	2.9	1.1852e-09
IPI00290461	Eukaryotic translation initiation factor 3 subunit J	1.13985	0.188841	1.24212	0.31281	1.05679	0.0796944	O75822	4	23.3	5.6361e-10
IPI00008494	Intercellular adhesion molecule 1	1.13965	0.188591	1.1451	0.19548	1.08582	0.118779	P05362	9	20.7	3.0674e-67
IPI00455210	Isoform 2 of Chromodomain-helicase-DNA-binding protein 4	1.13955	0.188459	0.963294	-0.0539517	1.21766	0.284115	Q14839-2	90	53.5	0
IPI00294962	Isoform 1 of SH3 domain-containing kinase-binding protein 1	1.13919	0.188003	1.32644	0.407555	0.666414	-0.58551	Q96B97-1	4	8.7	4.76e-29
IPI00011603	26S proteasome non-ATPase regulatory subunit 3	1.13899	0.187753	1.13952	0.188424	1.01922	0.027465	O43242	25	53	4.8827e-263
IPI00015102	Isoform 1 of CD166 antigen	1.13847	0.187091	0.828384	-0.271628	1.43984	0.525911	Q13740-1	10	29.7	2.8245e-63
IPI00181728	Brix domain-containing protein 2	1.13827	0.186841	1.03712	0.0525782	1.17355	0.230884	Q8TDN6	11	36	2.577e-99
IPI00298961	Exportin-1	1.13825	0.186812	1.16565	0.221129	0.973285	-0.0390663	O14980	40	52.9	0
IPI00003870	Putative ATP-dependent Clp protease proteolytic subunit, mitochondrial	1.13823	0.186797	1.33972	0.421931	1.07054	0.0983336	Q16740	3	16.2	1.2792e-29
IPI00019927	26S proteasome non-ATPase regulatory subunit 7	1.13797	0.186459	1.15305	0.205452	1.10609	0.145472	P51665	13	61.1	1.6266e-142
IPI00022744	Isoform 1 of Exportin-2	1.13726	0.185561	1.35977	0.443359	0.855545	-0.225085	P55060-1	45	63	0
IPI00294879	Ran GTPase-activating protein 1	1.13718	0.185458	1.18122	0.240272	0.97636	-0.0345152	P46060	19	49.2	3.1824e-204
IPI00154283	Isoform 1 of Protein CIP2A	1.13708	0.18534	0.988668	-0.0164412	1.08793	0.121586	Q8TCG1-1	2	6	1.9224e-06
IPI00012837	Kinesin-1 heavy chain	1.13691	0.185119	1.22047	0.287442	0.98203	-0.0261616	P33176	44	56.3	0
IPI00007052	Mitochondrial fission 1 protein	1.13646	0.184544	1.13321	0.180409	0.886171	-0.174342	Q9Y3D6	2	17.8	2.3773e-30
IPI00217507	Neurofilament medium polypeptide	1.13637	0.184427	1.46782	0.553678	0.737363	-0.439553	P07197	2	2.1	0.017064
IPI00797126	nascent polypeptide-associated complex alpha subunit isoform a	1.13623	0.18425	0.817457	-0.290786	1.28878	0.366001	Q13765	5	7.6	7.5444e-277
IPI00100460	Aspartyl-tRNA synthetase, mitochondrial	1.13596	0.183911	1.10867	0.148825	0.993081	-0.0100168	Q6PI48	23	45.4	1.9976e-180
IPI00291007	Isoform 3 of Scavenger receptor class B member 1	1.13539	0.183188	0.636248	-0.652338	1.66673	0.737021	Q8WTV0-1	4	8.5	0.015898
IPI00009253	Alpha-soluble NSF attachment protein	1.13533	0.183114	1.09792	0.134768	0.79654	-0.32818	P54920	3	12.9	7.9898e-16
IPI00010153	60S ribosomal protein L23	1.13475	0.182377	0.990996	-0.0130483	1.06688	0.093404	P62829	3	32.1	5.1319e-84
IPI00549672	HSPC027	1.13455	0.182126	1.18435	0.244097	1.03267	0.0463841	Q9UNM6	13	48.8	4.8815e-225
IPI00295992	Isoform 2 of ATPase family AAA domain-containing protein 3A	1.13447	0.182023	1.07375	0.102654	0.997405	-0.00374816	Q9NVI7-2	25	48.3	3.9226e-238
IPI00017376	Protein transport protein Sec23B	1.13447	0.182023	1.04153	0.0586989	1.16318	0.218068	Q15437	12	28.4	4.7472e-76
IPI00787853	Inositol monophosphatase 3	1.1344	0.181934	0.796629	-0.328021	1.39372	0.478936	Q9NX62	7	27	6.6952e-68
IPI00916768	21 kDa protein	1.13407	0.181506	1.3363	0.418239	0.811176	-0.301913	P62158	6	50.3	2.1463e-132
IPI00013894	Stress-induced-phosphoprotein 1	1.13396	0.181373	1.10895	0.149199	1.01547	0.0221502	P31948	32	52.5	2.0994e-196
IPI00018009	Enhancer of mRNA-decapping protein 3	1.1339	0.181299	1.15724	0.210685	0.735825	-0.442564	Q96F86	2	5.7	0.19882
IPI00418340	Isoform 1 of GC-rich sequence DNA-binding factor	1.13377	0.181122	1.02657	0.0378356	0.879848	-0.184674	P16383-1	2	4.6	0.0002358
IPI00027851	cDNA FLJ53927, highly similar to Beta-hexosaminidase alpha chain	1.13335	0.18059	0.976084	-0.0349228	1.05372	0.0754902	B4DVA7	11	31.3	7.1268e-203
IPI00301311	Isoform 2 of Protein SET	1.13313	0.180309	0.997953	-0.00295652	1.14492	0.195242	Q01105-2	10	41.2	0
IPI00301323	ATP-dependent RNA helicase DDX18	1.13296	0.180102	0.911724	-0.133331	1.33308	0.41476	Q9NVP1	8	17	1.1323e-23
IPI00221088	40S ribosomal protein S9	1.13285	0.179954	1.01779	0.0254469	1.11484	0.156834	P46781	13	50	3.2258e-22
IPI00006865	Vesicle-trafficking protein SEC22b	1.1327	0.179762	1.19013	0.251119	1.03152	0.0447722	O75396	8	49.3	2.1297e-118
IPI00005490	Golgi phosphoprotein 3	1.13269	0.179748	0.706634	-0.500965	1.01797	0.0256956	Q9H4A6	3	17.8	2.3528e-84
IPI00295857	Isoform 1 of Coatomer subunit alpha	1.13267	0.179733	1.28959	0.366909	0.914347	-0.129186	P53621-1	50	55.1	0
IPI00397904	Nuclear pore complex protein Nup93	1.13237	0.179348	1.14197	0.191524	1.06285	0.0879358	Q8N1F7	20	36.6	1.6578e-212
IPI00219078	Isoform SERCA2B of Sarcoplasmic/endoplasmic reticulum calcium ATPase 2	1.13179	0.178609	1.08133	0.112812	1.05554	0.0779879	P16615-1	43	46.5	0
IPI00009505	Isoform 1 of Beta-2-syntrophin	1.13146	0.17818	0.998309	-0.0024419	0.986835	-0.0191199	Q13425-1	6	13.7	5.4468e-21
IPI00024993	Enoyl-CoA hydratase, mitochondrial	1.13074	0.177262	1.15242	0.204663	1.02672	0.0380363	P30084	9	43.1	1.7811e-200
IPI00022048	Prostaglandin F2 receptor negative regulator	1.13063	0.177128	1.25333	0.325762	0.912099	-0.132738	Q9P2B2	15	20.5	7.8397e-64
IPI00219757	Glutathione S-transferase P	1.13014	0.176506	1.02471	0.035216	0.97117	-0.0422035	P09211	9	65.7	0
IPI00926820	Solute carrier family 4 sodium bicarbonate cotransporter member 7	1.12988	0.176165	1.08043	0.111605	1.00317	0.0045679	B5M451	26	29.2	2.5809e-177
IPI00305166	cDNA FLJ61478, highly similar to Succinate dehydrogenase (ubiquinone) flavoprotein subunit, mitochondrial	1.12987	0.17615	1.09273	0.127933	1.21536	0.28138	P31040	16	43	7.1377e-154
IPI00019269	WD repeat-containing protein 61	1.12982	0.176091	0.981205	-0.0273728	1.0886	0.122478	Q9GZS3	2	10.8	7.0669e-161
IPI00026215	Flap endonuclease 1	1.12952	0.175706	1.08986	0.124149	1.13329	0.180515	P39748	17	57.6	2.685e-230
IPI00470498	Isoform 3 of Plasminogen activator inhibitor 1 RNA-binding protein	1.1293	0.175424	0.91108	-0.13435	1.26888	0.343559	Q8NC51-3	22	62.3	0
IPI00009104	RuvB-like 2	1.1291	0.175172	1.22215	0.289416	0.928983	-0.106275	Q9Y230	23	59.8	0
IPI00014238	Isoform Cytoplasmic of Lysyl-tRNA synthetase	1.12908	0.175142	1.07339	0.102176	1.05276	0.0741739	Q15046-1	29	57.1	4.5435e-233
IPI00394781	Isoform 2 of C2 domain-containing protein 2-like	1.12903	0.175083	1.27918	0.355219	0.986546	-0.0195414	O14523-2	2	2.3	0.0050091
IPI00031801	Isoform 1 of DNA-binding protein A	1.12896	0.174994	0.961678	-0.0563737	1.42831	0.51431	P16989-1	9	33.1	6.2691e-291
IPI00013774	Histone deacetylase 1	1.12823	0.174059	0.888212	-0.171024	1.17605	0.233952	Q13547	15	37.3	4.3197e-154
IPI00465179	cDNA FLJ44241 fis, clone THYMU3008436, highly similar to 6-phosphofructokinase, muscle type	1.12729	0.172856	1.34988	0.432831	0.83325	-0.263179	Q6ZTT1	13	23.1	1.9609e-79
IPI00795979	53 kDa protein	1.12696	0.17244	0.702471	-0.509489	1.45205	0.538088	Q14254	2	4.8	0.0034522
IPI00027493	Isoform 2 of 4F2 cell-surface antigen heavy chain	1.12645	0.171786	1.14813	0.199287	1.02066	0.029504	P08195-2	30	58	0
IPI00746412	Isoform 1 of SFRS2-interacting protein	1.12624	0.171519	1.05139	0.0722917	1.13723	0.185522	Q99590-1	5	5.4	2.4922e-11
IPI00376005	Isoform 2 of Eukaryotic translation initiation factor 5A-1	1.12616	0.171415	1.23667	0.306466	1.00999	0.0143471	P63241-2	11	70.7	4.4151e-142
IPI00643722	Isoform 1 of AT-rich interactive domain-containing protein 1A	1.1259	0.171073	1.10939	0.149769	1.04632	0.0653234	O14497-1	34	24.3	0
IPI00828098	ring finger protein 213 isoform 1	1.12543	0.170478	1.04829	0.0680388	0.938516	-0.0915464	Q63HN8-1	9	3.2	6.3261e-23
IPI00178431	ATP-dependent DNA helicase Q1	1.12528	0.170284	0.937536	-0.0930534	1.15933	0.213293	P46063	17	35.6	8.8653e-130
IPI00143753	Isoform 1 of U2-associated protein SR140	1.12507	0.170016	1.01036	0.0148684	1.09024	0.124641	O15042-1	20	23.1	4.2163e-143
IPI00215780	40S ribosomal protein S19	1.12501	0.169942	1.04954	0.0697528	1.16394	0.219021	P39019	8	42.1	2.3245e-22
IPI00002214	Importin subunit alpha-2	1.12493	0.169838	0.740019	-0.434366	1.62541	0.700802	P52292	10	41.6	3.7227e-292
IPI00006052	Prefoldin subunit 2	1.12492	0.169823	1.50986	0.594418	0.6601	-0.599244	Q9UHV9	3	22.7	3.5526e-54
IPI00021417	U4/U6.U5 tri-snRNP-associated protein 1	1.1244	0.169153	0.980425	-0.0285209	0.9729	-0.0396362	O43290	5	9	1.0256e-46
IPI00029400	Isoform 1 of Zinc finger Ran-binding domain-containing protein 2	1.12433	0.169063	1.39525	0.48052	0.754084	-0.407203	O95218-1	4	13.3	1.3037e-06
IPI00010810	Electron transfer flavoprotein subunit alpha, mitochondrial	1.1243	0.169033	0.992078	-0.0114742	1.07082	0.0987221	P13804	16	66.4	9.3858e-242
IPI00218606	40S ribosomal protein S23	1.12418	0.16887	1.01573	0.0225129	1.1526	0.204897	P62266	7	49	6.4054e-10
IPI00059242	Synapse-associated protein 1	1.12392	0.168542	1.30587	0.38501	0.972708	-0.0399212	Q96A49	3	10.5	6.3411e-07
IPI00329629	DnaJ homolog subfamily C member 7	1.12391	0.168527	0.980904	-0.0278159	1.18018	0.239012	Q99615	16	37.7	3.8571e-190
IPI00166010	Isoform 1 of CCR4-NOT transcription complex subunit 1	1.12372	0.168289	1.00003	4.93886e-05	0.945358	-0.0810666	A5YKK6-1	18	10.2	8.6576e-54
IPI00386760	Isoform 1 of Nucleoporin NDC1	1.12365	0.168199	0.914435	-0.129047	1.35806	0.44155	Q9BTX1-1	8	19.3	3.5599e-163
IPI00015838	Cell growth-regulating nucleolar protein	1.12317	0.167573	0.946643	-0.0791082	1.19864	0.261393	Q9NX58	13	43.5	1.2931e-179
IPI00005675	NF-kappa-B-repressing factor	1.12307	0.167454	0.979206	-0.0303154	0.720306	-0.473319	O15226	4	9.7	1.7666e-13
IPI00549248	Isoform 1 of Nucleophosmin	1.12295	0.16729	0.981356	-0.0271514	1.13329	0.180515	P06748-1	14	54.8	0
IPI00030851	SEC24B protein	1.12277	0.167066	0.862317	-0.21371	1.24188	0.312525	O95487-1	4	5.5	1.1009e-15
IPI00927646	Ubiquitin carboxyl-terminal hydrolase	1.12268	0.166947	1.00509	0.00732067	1.00874	0.0125615	B4DGT3	4	6.6	2.4618e-11
IPI00017895	Isoform 1 of Glycerol-3-phosphate dehydrogenase, mitochondrial	1.1221	0.166201	1.11101	0.151869	0.997213	-0.00402619	P43304-1	21	40.9	3.0703e-191
IPI00019918	ATP-dependent RNA helicase DDX19A	1.12168	0.165663	1.22189	0.289109	1.04324	0.061077	Q9NUU7	10	29.9	2.3779e-78
IPI00427330	Ribosome maturation protein SBDS	1.12166	0.165633	1.06995	0.0975489	0.900894	-0.150571	Q9Y3A5	5	21.2	7.5786e-43
IPI00005198	Interleukin enhancer-binding factor 2	1.12121	0.165051	0.933921	-0.0986272	1.20056	0.263704	Q12905	18	73.6	1.4746e-294
IPI00015973	Band 4.1-like protein 2	1.12092	0.164678	0.914189	-0.129436	1.14069	0.189904	O43491	31	43.4	0
IPI00396171	Isoform 1 of Microtubule-associated protein 4	1.1202	0.163751	1.23621	0.305922	0.847886	-0.238058	P27816-1	22	30.6	1.5642e-129
IPI00397229	Isoform 1 of CD97 antigen	1.11999	0.163482	1.13014	0.176499	0.983567	-0.0239045	P48960-1	6	10.8	6.4289e-61
IPI00644127	Isoleucyl-tRNA synthetase, cytoplasmic	1.11985	0.163303	1.16947	0.22585	0.963675	-0.0533817	P41252	57	55.6	0
IPI00296379	Isoform Long of Tumor necrosis factor receptor superfamily member 10B	1.11951	0.162869	1.38416	0.469006	0.778589	-0.361066	O14763-1	2	7.3	7.8337e-07
IPI00170778	Formin-binding protein 4	1.1194	0.162719	1.50261	0.587466	0.538286	-0.893556	Q8N3X1	5	6.8	1.8491e-08
IPI00018968	NEDD8-activating enzyme E1 regulatory subunit	1.11933	0.162629	1.04736	0.0667568	0.964636	-0.0519438	Q13564	14	45.9	3.9504e-132
IPI00031627	DNA-directed RNA polymerase II subunit RPB1	1.11894	0.162136	0.866726	-0.206351	1.44734	0.533402	P24928	20	19.1	9.6523e-190
IPI00029159	cDNA FLJ38069 fis, clone CTONG2015434, highly similar to DOUBLE-STRAND BREAK REPAIR PROTEIN MRE11A	1.11893	0.162121	1.01025	0.0147119	1.21007	0.275092	B3KTC7	12	23.8	3.3044e-67
IPI00025849	Acidic leucine-rich nuclear phosphoprotein 32 family member A	1.11864	0.161747	1.1542	0.20689	0.985489	-0.0210881	P39687	16	55	7.076e-266
IPI00414323	Isoform 1 of Serine/threonine-protein phosphatase 4 regulatory subunit 3B	1.1184	0.161432	1.06367	0.0890488	0.974534	-0.0372157	Q5MIZ7-1	10	16.3	8.6462e-111
IPI00216047	Isoform 1 of SWI/SNF complex subunit SMARCC2	1.11826	0.161252	1.1082	0.148219	0.992985	-0.0101564	Q8TAQ2-1	41	46.1	0
IPI00015148	Ras-related protein Rap-1b	1.1179	0.160788	0.871875	-0.197806	1.23044	0.299179	P61224	6	41.3	4.7641e-47
IPI00304925	Heat shock 70 kDa protein 1	1.11739	0.160129	1.10898	0.149235	1.13944	0.188323	P08107	27	57.7	0
IPI00002922	F-box-like/WD repeat-containing protein TBL1XR1	1.11728	0.159994	1.13415	0.181611	1.06986	0.0974268	Q9BZK7	10	26.5	2.5242e-88
IPI00026089	Splicing factor 3B subunit 1	1.11725	0.159949	1.0176	0.0251751	1.06439	0.0900213	O75533	52	60.3	0
IPI00020042	Isoform 1 of 26S protease regulatory subunit 6B	1.11714	0.159814	1.08733	0.120792	1.10186	0.139947	P43686-1	25	79.4	0
IPI00215918	ADP-ribosylation factor 4	1.11702	0.159649	1.29746	0.375691	0.968095	-0.046779	P18085	11	79.4	4.574e-61
IPI00784090	T-complex protein 1 subunit theta	1.11657	0.159079	1.08218	0.113944	1.11186	0.152973	P50990	38	79	0
IPI00921422	Isoform 3 of Cytoskeleton-associated protein 5	1.11638	0.158824	1.18426	0.24398	0.928128	-0.107604	Q14008-3	49	35.5	1.5409e-245
IPI00021435	26S protease regulatory subunit 7	1.11633	0.158764	0.979138	-0.0304163	1.14472	0.195	P35998	22	55.2	1.7793e-212
IPI00886911	similar to actin alpha 1 skeletal muscle protein	1.11627	0.158689	1.08678	0.120065	1.10917	0.149478		1	2.4	3.5324e-09
IPI00015905	Exosome complex exonuclease RRP4	1.11505	0.157113	0.99583	-0.00602821	0.900413	-0.151341	Q13868	4	24.6	1.3201e-33
IPI00872762	Succinyl-CoA ligase [GDP-forming] subunit alpha, mitochondrial	1.11428	0.156107	1.06041	0.0846216	1.24851	0.320208	P53597	7	29.2	2.271e-104
IPI00789159	Ribosomal protein L23a, isoform CRA_a	1.11414	0.155926	0.964965	-0.0514518	1.02181	0.0311331	A8MUS3	8	27.8	8.6703e-20
IPI00009407	Dolichyl-diphosphooligosaccharide--protein glycosyltransferase subunit DAD1	1.11392	0.155641	1.1015	0.139475	1.15453	0.207301	P61803	3	28.3	1.2531e-18
IPI00412607	60S ribosomal protein L35	1.11366	0.15531	1.16007	0.214214	1.03834	0.0542835	P42766	4	30.9	1.4209e-28
IPI00910164	cDNA FLJ53381, highly similar to Monocarboxylate transporter 1	1.11332	0.154874	1.12989	0.176184	1.01749	0.0250145	B4DKS0	8	20	4.2295e-111
IPI00010415	Isoform 1 of Cytosolic acyl coenzyme A thioester hydrolase	1.113	0.154453	1.06472	0.0904783	1.24207	0.312749	O00154-1	8	29.7	2.363e-173
IPI00009464	Isoform 1 of Exosome component 10	1.11252	0.153836	0.794807	-0.331323	1.23727	0.307157	Q01780-1	25	41.5	8.4429e-178
IPI00007402	Importin-7	1.11216	0.153369	1.22093	0.287977	0.936662	-0.0944003	O95373	28	40.8	0
IPI00915253	Isoform 2 of RNA-binding protein 10	1.11194	0.153083	1.09203	0.12701	1.00605	0.00870803	P98175-2	16	24	2.9594e-94
IPI00012426	Isoform 1 of Retinoid-inducible serine carboxypeptidase	1.11168	0.152736	0.74488	-0.42492	1.23563	0.305251	Q9HB40-1	2	5.5	5.742e-24
IPI00329528	Isoform 1 of Protein VPRBP	1.1115	0.15251	0.902001	-0.148799	1.40573	0.491317	Q9Y4B6-1	23	22.7	5.5689e-204
IPI00020127	Replication protein A 70 kDa DNA-binding subunit	1.11121	0.152134	1.02037	0.0290914	1.18864	0.249313	P27694	17	38.5	1.7602e-164
IPI00221012	ubiquitin specific protease 9, X-linked isoform 3	1.11086	0.151682	1.46084	0.546798	0.808562	-0.306569	Q93008-2	30	17.4	3.7697e-211
IPI00409590	Isoform 1 of LIM domain only protein 7	1.11062	0.151365	1.12662	0.171999	1.2119	0.277267	Q8WWI1-1	2	1.7	0.0025858
IPI00409684	Isoform 2 of Nck-associated protein 1	1.11047	0.151169	1.03236	0.0459531	1.04488	0.0633344	Q9Y2A7-2	15	21.5	2.1341e-79
IPI00419249	Isoform 1 of Proteasome subunit alpha type-3	1.11043	0.151124	1.40127	0.486737	0.851778	-0.231451	P25788-1	8	36.5	3.5356e-35
IPI00003965	Ubiquitin carboxyl-terminal hydrolase 7	1.11035	0.151018	0.921378	-0.118135	1.21709	0.283431	Q93009	48	58.3	0
IPI00645793	Isoform 4 of Transcription initiation factor TFIID subunit 1	1.10952	0.149932	0.993612	-0.00924563	1.30425	0.383218	P21675-4	2	1.8	0.13285
IPI00011126	26S protease regulatory subunit 4	1.10938	0.149751	1.01814	0.0259321	1.04036	0.0570847	P62191	23	62.7	0
IPI00646377	Isoform 1 of Eukaryotic translation initiation factor 4 gamma 3	1.10935	0.14972	1.29594	0.373999	0.765904	-0.384764	O43432-1	12	9.5	1.1949e-25
IPI00419880	40S ribosomal protein S3a	1.10922	0.149539	1.13182	0.178647	0.89902	-0.153575	P61247	16	56.8	3.5887e-171
IPI00792352	26 kDa protein	1.10894	0.149177	1.11729	0.160008	1.03921	0.0554846	B5MDF5	10	41.1	9.3565e-88
IPI00003949	Ubiquitin-conjugating enzyme E2 N	1.10893	0.149162	0.94693	-0.07867	1.10206	0.140198	P61088	5	42.1	2.4905e-40
IPI00553185	T-complex protein 1 subunit gamma	1.10853	0.148648	1.04248	0.060026	1.08889	0.12286	P49368	37	77.8	0
IPI00430472	Activating signal cointegrator 1 complex subunit 3	1.10838	0.148452	1.19327	0.254915	1.01989	0.0284169	Q8N3C0	13	12.3	3.6841e-94
IPI00073602	Exosome complex exonuclease MTR3	1.10832	0.148376	0.879229	-0.185689	1.17961	0.238307	Q5RKV6	4	33.5	1.454e-09
IPI00002966	Heat shock 70 kDa protein 4	1.10824	0.148271	1.03603	0.0510726	1.07803	0.1084	P34932	47	72.1	0
IPI00014587	Isoform Brain of Clathrin light chain A	1.10731	0.147061	1.46207	0.548014	0.722708	-0.468515	P09496-1	4	19.4	3.7697e-17
IPI00029133	ATP synthase subunit b, mitochondrial	1.10722	0.14694	1.0918	0.126703	1.02402	0.0342504	P24539	10	46.9	1.0233e-152
IPI00295851	Coatomer subunit beta	1.10679	0.146381	1.32292	0.403723	0.830742	-0.267528	P53618	34	49.4	0
IPI00305068	Pre-mRNA-processing factor 6	1.10674	0.14632	1.11531	0.157441	1.06391	0.0893699	O94906	21	25.4	2.3199e-134
IPI00027233	Protein SCO1 homolog, mitochondrial	1.1067	0.146259	0.988121	-0.0172407	1.17836	0.236779	O75880	3	20.3	4.0165e-11
IPI00298423	Pyruvate dehydrogenase protein X component, mitochondrial	1.10632	0.145775	1.15468	0.207489	1.04219	0.0596144	O00330	5	12	7.5197e-09
IPI00033130	SUMO-activating enzyme subunit 1	1.10623	0.145654	0.976659	-0.0340729	1.17874	0.237249	Q9UBE0	7	28	1.2682e-70
IPI00006103	CD2 antigen cytoplasmic tail-binding protein 2	1.10609	0.145472	1.00446	0.00641622	0.918239	-0.123058	O95400	4	13.8	6.5824e-26
IPI00018120	28S ribosomal protein S29, mitochondrial	1.10606	0.145427	1.08995	0.124258	0.725514	-0.462924	P51398	2	8.8	6.8708e-17
IPI00007423	Isoform 1 of Acidic leucine-rich nuclear phosphoprotein 32 family member B	1.10594	0.145276	0.951901	-0.0711165	1.03508	0.0497366	Q92688-1	11	31.9	7.5936e-200
IPI00514856	Isoform 1 of Ubiquitin-associated protein 2-like	1.10584	0.145139	1.23843	0.308509	0.814309	-0.296352	Q14157-2	11	15.6	2.1729e-117
IPI00642374	Ubiquitin carboxyl-terminal hydrolase L5	1.1057	0.144958	0.790152	-0.339799	1.45791	0.543901	Q5LJA9	9	36.4	6.7122e-34
IPI00299095	Sorting nexin-2	1.10538	0.144549	1.34073	0.423021	0.82265	-0.281649	O60749	8	21.2	2.4712e-35
IPI00002549	Isoform 1 of Anaphase-promoting complex subunit 2	1.10471	0.14367	0.908122	-0.139041	1.03988	0.0564182	Q9UJX6-1	2	7.9	1.0579e-26
IPI00056357	UPF0556 protein C19orf10	1.10462	0.143548	0.933442	-0.0993678	1.1354	0.183204	Q969H8	3	18.5	8.1152e-16
IPI00306667	Isoform CNPII of 2,3-cyclic-nucleotide 3-phosphodiesterase	1.10451	0.143412	0.912929	-0.131426	1.19969	0.262665	P09543-1	11	27.8	1.2275e-63
IPI00009923	Isoform 1 of Prolyl 4-hydroxylase subunit alpha-1	1.10428	0.143109	0.776896	-0.364207	1.20296	0.266588	P13674-1	8	21	2.2441e-85
IPI00908469	cDNA FLJ52712, highly similar to Tubulin beta-6 chain	1.10404	0.14279	1.23895	0.309115	0.915376	-0.127564	B4DP54	17	51.9	0
IPI00795015	Isoform 1 of Sacsin	1.10402	0.14276	1.2073	0.271786	0.97636	-0.0345152	Q9NZJ4-1	7	2.8	1.5157e-44
IPI00290566	T-complex protein 1 subunit alpha	1.10382	0.142502	1.10076	0.138506	1.03556	0.0504061	P17987	32	74.6	0
IPI00011454	Isoform 2 of Neutral alpha-glucosidase AB	1.10342	0.141986	1.11417	0.155971	1.04824	0.067971	Q14697-2	55	72.8	0
IPI00021840	40S ribosomal protein S6	1.10333	0.141865	0.965896	-0.0500603	1.23371	0.303005	P62753	8	28.9	9.2984e-116
IPI00011635	Isoform 2 of Bcl-2-like protein 13	1.10332	0.141849	0.90092	-0.15053	1.33106	0.412575	Q9BXK5-1	2	4.9	0.060046
IPI00026824	Heme oxygenase 2	1.10275	0.141106	1.14204	0.19161	0.972516	-0.0402063	P30519	11	37	5.5752e-107
IPI00302927	T-complex protein 1 subunit delta	1.10273	0.141075	1.07106	0.0990437	1.04843	0.0682355	P50991	33	77.9	0
IPI00299524	Condensin complex subunit 1	1.10267	0.140999	1.08478	0.117408	1.01787	0.0255594	Q15021	15	18.1	1.1032e-206
IPI00021290	ATP-citrate synthase	1.10262	0.140938	1.07798	0.108328	1.01288	0.0184593	P53396	54	60.7	0
IPI00002557	Coatomer subunit gamma-2	1.10248	0.140756	1.09381	0.12936	0.796214	-0.328772	Q9UBF2	14	23.4	2.5772e-161
IPI00019450	Isoform Long of 60 kDa SS-A/Ro ribonucleoprotein	1.1024	0.14065	1.07131	0.0993756	0.995003	-0.00722739	P10155-1	13	32.9	2.9821e-148
IPI00513827	Putative uncharacterized protein DKFZp686M24262	1.10236	0.140589	1.04681	0.0660021	1.00231	0.00332355	Q5HYG7	12	36.6	7.1225e-172
IPI00182533	60S ribosomal protein L28	1.10195	0.140057	0.902741	-0.147616	1.12896	0.175	P46779	9	51.1	2.0167e-22
IPI00305627	Isoform 1 of UPF0420 protein C16orf58	1.10189	0.139981	1.14	0.18903	0.796646	-0.327989	Q96GQ5-1	5	17.1	1.0244e-33
IPI00293331	Ribonucleases P/MRP protein subunit POP1	1.10124	0.13913	0.774007	-0.369582	1.41697	0.50281	Q99575	26	41.2	3.6513e-300
IPI00925803	cDNA FLJ60579	1.10118	0.139054	1.25196	0.324184	1.14655	0.197299	B4DIY7	2	7.5	0.00030713
IPI00020928	Transcription factor A, mitochondrial	1.10116	0.139024	0.936496	-0.0946558	0.917769	-0.123798	Q00059	5	22.8	1.3323e-11
IPI00297779	T-complex protein 1 subunit beta	1.10114	0.138993	1.05641	0.0791713	1.08697	0.120311	P78371	39	82.1	0
IPI00024821	26S proteasome non-ATPase regulatory subunit 14	1.10081	0.138567	0.948108	-0.0768769	1.1354	0.183204	O00487	7	45.5	6.6486e-58
IPI00414289	Isoform 2 of COP9 signalosome complex subunit 1	1.10075	0.138491	0.922624	-0.116185	1.05074	0.0714057	Q13098-7	11	30.2	4.156e-78
IPI00021187	Isoform 1 of RuvB-like 1	1.10064	0.138339	1.12832	0.174172	0.967423	-0.0477818	Q9Y265-1	25	67.5	0
IPI00018206	Aspartate aminotransferase, mitochondrial	1.10036	0.137974	1.2611	0.334687	0.975783	-0.0353674	P00505	25	70.5	0
IPI00398708	Isoform I of Kinesin light chain 1	1.10009	0.137624	0.998665	-0.00192747	1.1379	0.186375	Q07866-9	7	18.6	1.1945e-16
IPI00155601	MACRO domain-containing protein 1	1.09976	0.137182	1.41168	0.497412	1.24534	0.316539	Q9BQ69	3	23.7	4.4882e-09
IPI00009507	Isoform 1 of Synaptophysin-like protein 1	1.09958	0.136954	1.09968	0.137088	1.3745	0.458902	Q16563-1	1	4.2	0.0098023
IPI00556278	Cancer/testis antigen family 45 member A2	1.09951	0.136862	0.960994	-0.0574013	1.32308	0.403903	Q5DJT8	7	51.9	4.1219e-42
IPI00783313	Glycogen phosphorylase, liver form	1.09927	0.136543	1.2317	0.300655	0.840698	-0.250341	P06737	27	42.7	6.5799e-258
IPI00436632	Isoform 1 of Nipped-B-like protein	1.09924	0.136512	1.0084	0.0120695	0.934884	-0.0971412	Q6KC79-1	4	2.7	1.3194e-132
IPI00418471	Vimentin	1.09922	0.136482	1.02192	0.0312776	1.07361	0.102472	P08670	36	77	0
IPI00329572	Protein kinase C and casein kinase substrate in neurons protein 3	1.09915	0.13639	1.14046	0.189619	1.13627	0.184303	Q9UKS6	5	14.9	9.217e-43
IPI00790230	cDNA, FLJ94609	1.09909	0.136314	1.21631	0.282513	1.02412	0.0343858	B2R9Y2	2	1.5	0.00018782
IPI00007582	Sodium- and chloride-dependent creatine transporter 1	1.09908	0.136299	1.01428	0.0204498	1.21392	0.279667	P48029	4	8	9.4997e-30
IPI00294744	Poly(A)-specific ribonuclease PARN	1.09893	0.136101	1.28481	0.361552	0.920873	-0.118927	O95453	5	8.9	1.1323e-12
IPI00644231	Isoform 1 of Cytoplasmic FMR1-interacting protein 1	1.09872	0.135826	1.22275	0.290127	0.919498	-0.121081	Q7L576-1	33	33.1	6.7968e-261
IPI00219217	L-lactate dehydrogenase B chain	1.09872	0.135826	1.09727	0.133922	1.02864	0.0407344	P07195	19	58.4	0
IPI00016418	Isoform 1 of Lysophosphatidylcholine acyltransferase 2	1.0984	0.1354	1.04892	0.0689055	1.037	0.052413	Q7L5N7-1	8	17.6	6.0476e-38
IPI00220344	60S ribosomal protein L36a	1.09836	0.135354	1.06275	0.0878039	0.964828	-0.0516563	P83881	5	32.1	9.8188e-05
IPI00024067	Isoform 1 of Clathrin heavy chain 1	1.09816	0.135095	1.27699	0.352746	0.905795	-0.142744	Q00610-1	100	72.3	0
IPI00855820	Isoform 1 of Protein MON2 homolog	1.09792	0.134774	0.886541	-0.17374	1.28109	0.357369	Q7Z3U7-1	4	4.7	3.7687e-09
IPI00328319	Histone-binding protein RBBP4	1.09776	0.134561	0.911833	-0.133158	1.18758	0.24803	Q09028	18	64	2.2769e-139
IPI00641743	Putative uncharacterized protein HCFC1	1.09761	0.134362	0.952148	-0.070743	1.03863	0.054684	A6NEM2	24	18.8	4.6328e-159
IPI00162563	Isoform 1 of E3 ubiquitin-protein ligase BRE1B	1.09735	0.134027	0.902618	-0.147813	1.24121	0.311744	O75150-1	12	16	7.7688e-61
IPI00004860	Isoform Complexed of Arginyl-tRNA synthetase, cytoplasmic	1.09731	0.133966	1.11953	0.162887	1.00346	0.00498245	P54136-1	34	57.9	0
IPI00420084	Isoform 2 of BH3-interacting domain death agonist	1.09711	0.133706	1.3858	0.470717	0.830406	-0.268112	P55957-2	1	6.2	4.0254e-32
IPI00305383	Cytochrome b-c1 complex subunit 2, mitochondrial	1.09692	0.133462	1.19699	0.259411	0.909341	-0.137107	P22695	18	53.2	0
IPI00017451	Splicing factor 3 subunit 1	1.09654	0.132958	0.993174	-0.00988202	1.14434	0.194516	Q15459	26	42.5	9.7391e-163
IPI00465170	Isoform 1 of 5-nucleotidase domain-containing protein 3	1.09585	0.132057	1.02056	0.0293625	1.43475	0.520799	Q86UY8-1	10	33.4	4.7861e-81
IPI00002186	Brefeldin A-inhibited guanine nucleotide-exchange protein 2	1.0958	0.13198	0.765818	-0.384927	0.957361	-0.0628649	Q9Y6D5	4	4.5	4.2083e-75
IPI00419273	Isoform 1 of Cullin-4A	1.09572	0.131873	0.946834	-0.078816	1.20286	0.266473	Q13619-1	9	15.7	1.2399e-64
IPI00007948	DNA-directed RNA polymerase III subunit RPC3	1.09566	0.131797	1.05533	0.0776931	0.859158	-0.219004	Q9BUI4	4	11	4.5689e-47
IPI00027626	T-complex protein 1 subunit zeta	1.09561	0.131736	1.08578	0.118737	1.00923	0.0132485	P40227	28	66.1	0
IPI00328154	NEDD8-activating enzyme E1 catalytic subunit	1.09553	0.131629	0.982725	-0.0251397	1.10542	0.144595	Q8TBC4	7	28.1	8.3631e-88
IPI00293533	Nuclear pore glycoprotein p62	1.0955	0.131583	1.26603	0.340316	0.831885	-0.265543	P37198	5	14.2	5.7969e-33
IPI00011609	Isoform II of Ubiquitin-protein ligase E3A	1.09532	0.131354	1.13757	0.18596	0.985105	-0.021651	Q05086-1	16	28	2.5976e-274
IPI00794956	Putative uncharacterized protein SCFD1	1.09527	0.131293	1.1519	0.204012	0.940717	-0.0881675	A8MVJ7	10	23.8	9.4778e-112
IPI00412441	Isoform 3 of Wings apart-like protein homolog	1.0952	0.131201	1.43482	0.520871	0.925783	-0.111254	Q7Z5K2-3	5	7.4	2.9993e-157
IPI00028006	Proteasome subunit beta type-2	1.09516	0.13114	1.19966	0.262626	0.958428	-0.0612583	P49721	8	62.7	1.465e-78
IPI00219249	Contactin-associated protein 1	1.09494	0.130849	0.744784	-0.425105	1.43273	0.518768	P78357	29	27.8	0
IPI00291093	DNA-directed RNA polymerases I, II, and III subunit RPABC1	1.09489	0.130788	1.08257	0.114455	1.03681	0.0521455	P19388	3	28.6	4.5473e-96
IPI00029697	Isoform 2 of Exosome complex exonuclease RRP45	1.09483	0.130711	0.991832	-0.0118327	1.26052	0.334022	Q06265-2	4	9.6	4.0272e-14
IPI00303476	ATP synthase subunit beta, mitochondrial	1.0946	0.130406	1.00028	0.000404937	1.03027	0.0430239	P06576	28	77.9	0
IPI00329605	DNA mismatch repair protein Msh3	1.09447	0.130237	1.13195	0.178804	1.1034	0.141958	P20585	8	13.5	9.9996e-23
IPI00032826	Hsc70-interacting protein	1.09397	0.129579	1.18442	0.24418	0.970017	-0.0439176	P50502	11	36.9	9.491e-55
IPI00654777	HCG1784554, isoform CRA_a	1.09387	0.129441	1.18625	0.246413	0.903248	-0.146806	B3KSH1	10	35.2	5.9968e-270
IPI00024425	Putative uncharacterized protein KIAA0664	1.09368	0.129196	1.16292	0.217752	0.904584	-0.144674	C9J6D7	18	18.1	7.9467e-47
IPI00012462	Eukaryotic translation initiation factor 2A	1.09356	0.129028	1.03828	0.0541964	1.16894	0.225202	C9JWR7	5	15.9	1.5092e-19
IPI00026904	cDNA FLJ59367, highly similar to Adenylosuccinate lyase	1.09353	0.128997	1.41921	0.505089	0.807736	-0.308044	B0QY75	5	18.9	5.6237e-43
IPI00033143	Eukaryotic translation initiation factor 3 subunit K	1.09322	0.128584	1.00455	0.00655389	0.952835	-0.0697018	Q9UBQ5	3	18.8	1.272e-10
IPI00337386	Isoform 2 of Pre-mRNA-processing factor 40 homolog A	1.09316	0.128507	1.17634	0.234305	0.90641	-0.141765	O75400-2	12	12.5	1.5529e-35
IPI00301104	Melanoma-associated antigen 10	1.09291	0.12817	0.970237	-0.0435911	1.3326	0.41424	P43363	7	21.1	5.1018e-88
IPI00004962	Golgi integral membrane protein 4	1.09284	0.128078	0.884761	-0.17664	1.26898	0.343669	O00461	8	13.8	1.2544e-98
IPI00305833	WD40 repeat-containing protein SMU1	1.09221	0.127251	0.853923	-0.227822	0.983183	-0.0244684	Q2TAY7	6	17.2	1.1748e-47
IPI00797537	Isoform 1 of NudC domain-containing protein 1	1.09213	0.127143	1.03494	0.0495463	1.24813	0.319764	Q96RS6-1	8	19.2	6.9294e-19
IPI00023001	UPF0389 protein FAM162A	1.09182	0.126729	1.12704	0.172542	1.10513	0.144218	Q96A26	3	18.8	3.6194e-06
IPI00549516	Target of EGR1 protein 1	1.0918	0.126714	1.34791	0.430722	0.918297	-0.122967	Q96GM8	3	10.6	0.039719
IPI00877662	similar to RAB13, member RAS oncogene family	1.09177	0.126668	1.04426	0.0624875	1.24447	0.315536	P51153	4	14.1	3.0981e-43
IPI00103247	Isoform 1 of Heterogeneous nuclear ribonucleoprotein L-like	1.09159	0.126438	1.19995	0.262972	1.14617	0.196816	Q8WVV9-1	5	11.6	1.3622e-12
IPI00030320	Probable ATP-dependent RNA helicase DDX6	1.09154	0.126361	0.960857	-0.0576068	1.34932	0.43223	P26196	14	45.8	1.0042e-120
IPI00217030	40S ribosomal protein S4, X isoform	1.09147	0.126269	1.13133	0.178019	1.00673	0.00967235	P62701	19	61.6	6.7643e-208
IPI00299573	60S ribosomal protein L7a	1.09144	0.126238	0.963527	-0.0536031	1.14617	0.196816	P62424	16	52.6	1.6826e-150
IPI00217553	39S ribosomal protein L41, mitochondrial	1.09069	0.125241	0.655379	-0.6096	0.924409	-0.113397	Q8IXM3	2	35	2.3534e-16
IPI00873376	360 kDa protein	1.09027	0.124688	0.899756	-0.152395	1.00999	0.0143471	Q96RL7-1	9	6.1	1.4406e-59
IPI00026262	Isoform 1 of Ras GTPase-activating protein 1	1.09025	0.124657	1.14534	0.195773	0.80837	-0.306912	P20936-1	3	4.7	2.353e-21
IPI00060181	EF-hand domain-containing protein D2	1.09007	0.124427	1.19743	0.259939	1.09783	0.134652	Q96C19	6	28.8	1.2936e-19
IPI00386755	ERO1-like protein alpha	1.09006	0.124411	1.09916	0.136405	1.01153	0.0165417	Q96HE7	17	52.8	2.4195e-271
IPI00151141	Isoform 1 of Serine/threonine-protein kinase WNK4	1.08969	0.12392	1.38484	0.469719	0.784778	-0.349643	Q96J92-1	6	8.5	2.2941e-14
IPI00009790	6-phosphofructokinase type C	1.08942	0.123566	1.38059	0.46529	0.819931	-0.286426	Q01813	23	42.6	0
IPI00645452	Tubulin, beta	1.08915	0.123197	1.2543	0.32688	0.922574	-0.116264	B4DQN9	23	71.8	0
IPI00008524	Isoform 1 of Polyadenylate-binding protein 1	1.08904	0.123059	1.13307	0.180235	1.0272	0.0387113	P11940-1	24	40.6	2.5445e-283
IPI00018465	T-complex protein 1 subunit eta	1.08884	0.122797	1.08572	0.118646	1.01403	0.0201009	Q99832	35	79.2	0
IPI00014310	Cullin-1	1.08868	0.122582	1.05485	0.0770378	1.02825	0.0401952	Q13616	10	20.4	6.7715e-68
IPI00073779	Isoform 1 of 28S ribosomal protein S35, mitochondrial	1.08845	0.122274	0.681027	-0.554217	1.18931	0.250129	P82673-1	3	15.5	3.8057e-19
IPI00220834	ATP-dependent DNA helicase 2 subunit 2	1.08838	0.122182	0.955009	-0.066413	1.16058	0.214847	P13010	40	69.5	0
IPI00009268	cDNA FLJ60317, highly similar to Aminoacylase-1	1.08836	0.122151	0.990408	-0.0139057	1.10561	0.144845	B4DNW0	5	20.5	5.6874e-29
IPI00215888	Signal recognition particle 72 kDa protein	1.08822	0.121967	1.17248	0.229561	0.953633	-0.0684947	O76094	17	36.5	0
IPI00095891	Isoform XLas-1 of Guanine nucleotide-binding protein G(s) subunit alpha isoforms XLas	1.08816	0.12189	1.07807	0.108457	1.09495	0.130859	Q5JWF2-1	13	15.7	1.9801e-90
IPI00291946	Ubiquitin carboxyl-terminal hydrolase 10	1.08814	0.121859	0.626636	-0.674302	1.75793	0.813876	Q14694	2	5.1	0.00019128
IPI00026829	Isoform Long of Deoxyhypusine synthase	1.0879	0.121551	1.42921	0.515215	0.673054	-0.571206	P49366-1	2	11.4	5.7975e-26
IPI00218343	Tubulin alpha-1C chain	1.08781	0.121428	1.10984	0.150356	0.887046	-0.172919	Q9BQE3	23	71.7	0
IPI00063130	Transmembrane protein 205	1.08775	0.121351	0.987559	-0.0180607	1.04613	0.0650583	Q6UW68	2	15.9	8.3182e-16
IPI00001580	Isoform 1 of FYVE and coiled-coil domain-containing protein 1	1.08766	0.121228	1.04589	0.0647371	1.16942	0.225795	Q9BQS8-1	14	13.6	1.4647e-74
IPI00306516	Mitochondrial import inner membrane translocase subunit TIM44	1.08761	0.121166	1.07739	0.10754	0.944993	-0.081624	O43615	16	37.2	7.0638e-205
IPI00604523	Myosin regulatory light chain MRCL3 variant	1.08734	0.120797	1.35814	0.441629	0.7239	-0.466138	Q53HL1	6	42.9	6.6012e-111
IPI00916111	Malate dehydrogenase	1.08718	0.120596	1.38169	0.466434	0.923967	-0.114087	P40925	11	34.7	9.2994e-143
IPI00003527	Na(+)/H(+) exchange regulatory cofactor NHE-RF1	1.08715	0.12055	1.04631	0.0653036	1.28868	0.365894	O14745	11	35.5	6.8648e-53
IPI00027192	cDNA, FLJ79184, highly similar to Procollagen-lysine, 2-oxoglutarate 5-dioxygenase 1	1.08696	0.120304	0.694255	-0.526463	1.53882	0.621828	B2R5M9	14	24.3	2.7619e-146
IPI00305289	Kinesin-like protein KIF11	1.08694	0.120273	0.789371	-0.341225	1.56102	0.642491	P52732	3	4.4	2.1521e-30
IPI00011511	Isoform 2 of Cat eye syndrome critical region protein 5	1.08681	0.120103	1.06787	0.0947396	0.946704	-0.0790149	Q9BXW7-1	3	13.9	1.4607e-31
IPI00218695	Isoform 3 of Caldesmon	1.08616	0.11924	1.39086	0.475982	0.827648	-0.272912	Q05682-3	10	22.6	1.8115e-31
IPI00218729	Isoform 2 of Disks large homolog 1	1.08603	0.119071	1.01737	0.024845	1.21017	0.275206	Q12959-2	2	5.5	0.02166
IPI00216587	40S ribosomal protein S8	1.08595	0.118963	1.08844	0.122263	0.983663	-0.0237636	P62241	9	49.5	1.184e-199
IPI00183002	Isoform 1 of Protein phosphatase 1 regulatory subunit 12A	1.08562	0.118515	1.57217	0.652756	0.749126	-0.416721	O14974-1	11	14.3	2.7336e-128
IPI00012750	40S ribosomal protein S25	1.08557	0.118454	1.17612	0.234036	0.940429	-0.0886097	P62851	4	24	8.2603e-29
IPI00218019	Isoform 1 of Basigin	1.08556	0.118438	1.09237	0.127462	0.902739	-0.147619	P35613-1	8	30.1	1.9685e-192
IPI00414384	Isoform 1 of Hydroxysteroid dehydrogenase-like protein 2	1.08544	0.118284	1.04023	0.0568958	1.13723	0.185522	Q6YN16-1	11	35.9	1.4728e-189
IPI00872940	Putative uncharacterized protein RPL30 (Fragment)	1.08523	0.118006	1.24771	0.319284	0.894292	-0.161183	A8MYX5	7	63.5	2.4117e-61
IPI00028091	Actin-related protein 3	1.08513	0.117867	1.15746	0.210958	0.967711	-0.0473519	P61158	16	59.1	1.3452e-185
IPI00023673	Galectin-3-binding protein	1.08482	0.117451	0.90196	-0.148864	1.2931	0.370834	Q08380	5	11.5	1.5313e-22
IPI00028005	Nuclear pore complex protein Nup107	1.08472	0.117327	1.11186	0.152971	0.931501	-0.102371	P57740	18	30.7	1.2568e-229
IPI00010252	Isoform Alpha of E3 ubiquitin-protein ligase TRIM33	1.08456	0.117111	0.888089	-0.171225	0.864866	-0.209451	Q9UPN9-1	4	4.3	5.069e-11
IPI00005260	Isoform 1 of Proteasome activator complex subunit 4	1.08453	0.117065	0.856593	-0.223318	1.24909	0.320874	Q14997-1	26	20.2	9.9632e-249
IPI00797574	Biorientation of chromosomes in cell division protein 1-like	1.08447	0.116987	0.903234	-0.146829	1.06612	0.092364	Q8NFC6	22	12.7	1.5967e-176
IPI00783656	39S ribosomal protein L38, mitochondrial	1.08435	0.116833	1.04228	0.0597418	0.845445	-0.242217	Q96DV4	6	18.9	5.4936e-25
IPI00009680	39S ribosomal protein L44, mitochondrial	1.08425	0.116694	0.96999	-0.0439577	1.04997	0.0703497	Q9H9J2	4	18.4	6.4456e-56
IPI00470502	Isoform 2 of Inorganic pyrophosphatase 2, mitochondrial	1.0842	0.116632	1.21765	0.284104	1.06371	0.0891093	Q9H2U2-2	9	33.8	4.8517e-116
IPI00219575	Bleomycin hydrolase	1.08412	0.116524	1.032	0.0454363	1.09322	0.128578	Q13867	6	20.7	9.3296e-26
IPI00926935	Galphai2 protein	1.08407	0.116462	0.969182	-0.0451599	1.07044	0.0982041	Q6B6N3	14	53	0
IPI00465044	Protein RCC2	1.08406	0.116447	1.09429	0.129992	1.08678	0.120056	Q9P258	21	56.1	0
IPI00306369	tRNA (cytosine-5-)-methyltransferase NSUN2	1.08382	0.116122	1.03506	0.049718	1.00529	0.00760516	Q08J23	33	54.4	6.8508e-168
IPI00299608	Isoform 1 of 26S proteasome non-ATPase regulatory subunit 1	1.08366	0.115906	1.03336	0.0473494	1.03738	0.0529476	Q99460-1	34	50.1	1.0445e-303
IPI00010201	proteasome 26S non-ATPase subunit 8	1.08359	0.115813	1.00724	0.0104033	0.936258	-0.0950221	B4DX18	7	32.3	6.8237e-32
IPI00026519	Peptidyl-prolyl cis-trans isomerase, mitochondrial	1.08356	0.115782	1.0045	0.00647522	1.20219	0.265666	P30405	4	25.1	2.65e-10
IPI00607584	Isoform 2 of Myb-binding protein 1A	1.08354	0.115752	1.09642	0.132806	0.992793	-0.0104357	Q9BQG0-2	72	66.8	0
IPI00337541	NAD(P) transhydrogenase, mitochondrial	1.08244	0.114283	0.844652	-0.243571	1.15347	0.205979	Q13423	15	20.7	1.8127e-148
IPI00003519	116 kDa U5 small nuclear ribonucleoprotein component	1.08223	0.114004	1.01482	0.0212287	1.06362	0.0889789	Q15029	41	67.4	0
IPI00025329	60S ribosomal protein L19	1.0821	0.113834	1.09825	0.1352	0.925207	-0.112153	P84098	9	40.8	6.6933e-68
IPI00298281	Laminin subunit gamma-1	1.08157	0.113122	0.802202	-0.317963	1.30886	0.388311	P11047	35	33.1	0
IPI00893918	Valyl-tRNA synthetase	1.08152	0.11306	1.02626	0.0373929	1.08841	0.122223	B0V043	37	43	7.5436e-204
IPI00297113	Tripartite motif-containing protein 32	1.08147	0.112998	1.59778	0.676065	0.646416	-0.629466	Q13049	2	4.4	0.00012972
IPI00100160	Isoform 1 of Cullin-associated NEDD8-dissociated protein 1	1.08103	0.112409	0.951326	-0.0719885	1.16933	0.225676	Q86VP6-1	42	46	0
IPI00003348	Guanine nucleotide-binding protein G(I)/G(S)/G(T) subunit beta-2	1.08092	0.112255	1.13674	0.1849	0.924332	-0.113517	P62879	13	43.5	2.2346e-138
IPI00023344	Isoform 1 of Symplekin	1.08065	0.111898	0.923391	-0.114987	1.00336	0.00484428	Q92797-1	20	26.2	2.7957e-172
IPI00464979	Isoform 1 of Succinyl-CoA ligase [ADP-forming] subunit beta, mitochondrial	1.0806	0.111836	1.00574	0.00826383	1.21795	0.284456	Q9P2R7-1	6	18.1	2.6386e-46
IPI00140301	Glycerol-3-phosphate acyltransferase 3	1.08038	0.111542	0.943	-0.0846701	0.985585	-0.0209474	Q53EU6	3	10.1	1.0389e-156
IPI00477118	Transmembrane protein 214	1.08028	0.111402	1.02186	0.0312003	1.28897	0.366216	Q6NUQ4	10	19.3	3.9637e-73
IPI00168388	Isoform 1 of Signal recognition particle 68 kDa protein	1.08021	0.111309	1.14243	0.192112	0.918038	-0.123375	Q9UHB9-1	18	38.4	3.0839e-301
IPI00152303	Phosphatidylinositol-5-phosphate 4-kinase type-2 gamma	1.07998	0.110999	1.04053	0.0573135	0.657361	-0.605242	Q8TBX8	3	10	7.0647e-08
IPI00013068	Eukaryotic translation initiation factor 3 subunit E	1.07988	0.110875	1.16192	0.216512	0.923342	-0.115063	P60228	21	52.4	4.9932e-175
IPI00301263	CAD protein	1.07913	0.109867	1.2304	0.299131	0.888641	-0.170327	P27708	75	52	0
IPI00925052	Putative uncharacterized protein ARPC4	1.07897	0.109649	1.17288	0.23005	1.06813	0.0950923	C9JWM7	7	42.2	2.5565e-34
IPI00003923	Isoform 1 of Uridine 5-monophosphate synthase	1.07879	0.109417	1.00621	0.00893154	0.862647	-0.213159	P11172-1	2	6	0.0001766
IPI00300371	Isoform 1 of Splicing factor 3B subunit 3	1.07864	0.109215	1.00318	0.00458592	1.00999	0.0143471	Q15393-1	44	48.1	0
IPI00021338	Dihydrolipoyllysine-residue acetyltransferase component of pyruvate dehydrogenase complex, mitochondrial	1.07854	0.109075	1.15835	0.212067	1.13531	0.183082	P10515	12	28.1	3.061e-93
IPI00554777	Asparagine synthetase [glutamine-hydrolyzing]	1.07837	0.108858	1.29921	0.377638	0.859293	-0.218778	P08243	9	20.9	2.966e-119
IPI00029623	Proteasome subunit alpha type-6	1.07819	0.108609	1.34069	0.422977	0.94605	-0.0800111	P60900	10	51.6	1.1133e-120
IPI00003843	cDNA FLJ53324, highly similar to Tight junction protein ZO-2	1.07815	0.108563	0.760765	-0.394477	1.10369	0.142335	Q9UDY2-1	3	3.7	5.3747e-06
IPI00000874	Peroxiredoxin-1	1.07796	0.108298	1.10057	0.138255	1.09773	0.134526	Q06830	12	59.3	5.1648e-70
IPI00397358	Ribosomal protein S27	1.07775	0.108019	1.3564	0.439781	0.737901	-0.4385	P42677	2	14.2	0.00013682
IPI00007818	Cleavage and polyadenylation specificity factor subunit 3	1.07775	0.108019	1.30846	0.387866	0.866385	-0.20692	Q9UKF6	2	2.9	0.0013084
IPI00005904	Probable ATP-dependent RNA helicase DDX20	1.07761	0.107832	0.902193	-0.148492	1.1576	0.211139	Q9UHI6	2	4.1	0.01207
IPI00645369	dystonin isoform 2	1.07745	0.107615	1.09972	0.137142	1.01432	0.020511	Q5T0V7	10	2.6	6.808e-72
IPI00023122	Isoform 1 of PDZ and LIM domain protein 7	1.07731	0.107428	0.95794	-0.0619929	1.04882	0.0687643	Q9NR12-1	3	11.8	2.8824e-34
IPI00029079	GMP synthase [glutamine-hydrolyzing]	1.07728	0.107397	0.865371	-0.20861	1.17451	0.232065	P49915	31	66.2	0
IPI00472858	Isoform 1 of Protein GPR89	1.07707	0.107117	1.2362	0.305906	0.799097	-0.323558	Q9Y302-1	2	8.6	1.4967e-20
IPI00221092	40S ribosomal protein S16	1.07678	0.106729	1.14356	0.193529	0.909014	-0.137626	P62249	8	46.6	1.0797e-18
IPI00064212	Zinc finger protein 828	1.07657	0.106449	0.970798	-0.0427566	1.28224	0.358667	Q96JM3	9	13.1	1.2167e-18
IPI00171626	Lysophosphatidylcholine acyltransferase 1	1.07632	0.106106	0.846912	-0.239716	1.1798	0.238542	Q8NF37	4	9	3.528e-12
IPI00013415	40S ribosomal protein S7	1.07622	0.105966	0.971921	-0.0410888	1.17951	0.23819	P62081	7	51.5	1.9192e-75
IPI00026569	HLA class I histocompatibility antigen, A-1 alpha chain	1.07598	0.105655	0.987751	-0.0177807	1.09581	0.131998	P30443	8	32.6	9.4028e-138
IPI00013485	40S ribosomal protein S2	1.07568	0.10525	1.02505	0.0356979	1.18614	0.246277	P15880	14	51.9	1.435e-171
IPI00296421	EH domain-binding protein 1-like protein 1	1.07545	0.104939	1.22939	0.297942	0.775389	-0.367007	Q8N3D4	3	2.8	5.9971e-35
IPI00010278	28S ribosomal protein S30, mitochondrial	1.07541	0.104892	1.02382	0.0339623	1.10283	0.141204	Q9NP92	6	17.5	8.5235e-26
IPI00760837	family with sequence similarity 98, member B isoform 1	1.07539	0.104861	1.06921	0.0965514	1.00029	0.000415862	A8MUW5	6	20.8	1.0212e-130
IPI00247583	60S ribosomal protein L21	1.07522	0.104628	1.06683	0.0933329	0.986162	-0.0201037	P46778	7	37.5	8.0639e-55
IPI00033030	Proteasomal ubiquitin receptor ADRM1	1.0749	0.104207	0.976399	-0.0344573	0.939698	-0.0897305	Q16186	8	19.9	1.4427e-54
IPI00009901	Nuclear transport factor 2	1.07442	0.103552	0.900235	-0.151627	1.22977	0.29839	P61970	3	37.8	1.4497e-28
IPI00007074	Tyrosyl-tRNA synthetase, cytoplasmic	1.07429	0.103381	1.25213	0.32439	0.898395	-0.154578	P54577	28	56.1	8.9524e-179
IPI00939304	Isoform 3 of Importin-5	1.07424	0.103319	1.05919	0.0829626	0.957332	-0.0629083	O00410-3	47	62.8	0
IPI00414197	Isoform 1 of WD repeat-containing protein 26	1.07387	0.10282	1.41099	0.496713	0.729762	-0.454503	Q9H7D7-1	5	8.2	3.9779e-11
IPI00747849	Isoform 1 of Sodium/potassium-transporting ATPase subunit beta-1	1.07365	0.102523	0.684478	-0.546925	1.56775	0.648695	P05026-1	4	17.8	1.366e-23
IPI00021924	Histone H1x	1.07359	0.102445	0.953558	-0.0686075	1.5715	0.65214	Q92522	5	26.3	2.3051e-29
IPI00743335	Isoform 1 of Myosin-Ic	1.07321	0.101931	1.21727	0.28365	0.858313	-0.220425	O00159-1	38	46.5	0
IPI00329696	Regulator of microtubule dynamics protein 1	1.07305	0.101712	1.15487	0.207729	0.996829	-0.00458241	Q96DB5	4	12.4	5.0513e-09
IPI00005634	Tetratricopeptide repeat protein 37	1.07303	0.101697	1.30896	0.388425	0.7495	-0.415999	Q6PGP7	6	9.8	1.2962e-19
IPI00641109	Putative uncharacterized protein ZMYM3	1.07285	0.101447	0.727476	-0.459029	1.01605	0.0229692	A6NHB5	2	2.8	5.1753e-127
IPI00008274	Isoform 1 of Adenylyl cyclase-associated protein 1	1.07263	0.10115	1.17335	0.230639	0.909523	-0.136817	Q01518-1	21	50.9	0
IPI00018146	14-3-3 protein theta	1.07254	0.101025	1.36485	0.448739	0.939717	-0.089701	P27348	17	57.6	1.533e-222
IPI00792422	Isoform 1 of Protein FAM21A	1.07245	0.100916	1.86768	0.901246	0.666077	-0.586239	Q641Q2-1	4	6.6	4.766e-31
IPI00000155	Isoform 1 of Putative oxidoreductase GLYR1	1.07237	0.100807	1.16974	0.226188	0.999712	-0.000415982	Q49A26-1	2	6	1.9772e-38
IPI00024915	Isoform Mitochondrial of Peroxiredoxin-5, mitochondrial	1.07213	0.100479	1.22049	0.287459	0.773775	-0.370014	P30044-1	7	50	3.6084e-103
IPI00003768	Isoform 1 of Pescadillo homolog	1.07211	0.100447	0.853375	-0.228748	1.12339	0.167859	O00541-1	4	6.5	0.00010937
IPI00179589	14 kDa protein	1.07201	0.100323	1.46947	0.555293	0.718336	-0.47727	P58546	2	20.8	1.3593e-39
IPI00917650	family with sequence similarity 38, member A	1.07142	0.0995256	0.797026	-0.327302	0.845993	-0.241283	Q92508	2	0.9	0.054848
IPI00791325	Pumilio domain-containing protein KIAA0020	1.07106	0.099041	0.839024	-0.253216	1.39429	0.479532	Q15397	10	22.8	2.2549e-71
IPI00032959	Glycerol-3-phosphate dehydrogenase 1-like protein	1.07064	0.098478	1.32549	0.406527	0.925841	-0.111164	Q8N335	2	11.7	0.0010704
IPI00853369	Plexin-B2	1.07036	0.0981026	0.821236	-0.284131	1.40746	0.493091	O15031	9	7.8	3.7614e-38
IPI00026320	E3 ubiquitin-protein ligase UBR5	1.07024	0.0979305	0.893799	-0.161978	1.10417	0.142963	O95071	55	29.9	0
IPI00395865	Histone-binding protein RBBP7	1.07	0.0976175	0.944096	-0.0829951	1.02758	0.0392511	Q16576	18	70.6	9.4769e-141
IPI00013847	Cytochrome b-c1 complex subunit 1, mitochondrial	1.06996	0.0975549	1.23852	0.308621	0.860302	-0.217085	P31930	18	52.9	0
IPI00010136	Isoform 2 of C-terminal-binding protein 2	1.06983	0.0973827	0.854662	-0.226574	1.15289	0.205258	P56545-2	11	17.6	7.0567e-74
IPI00012578	Importin subunit alpha-4	1.06956	0.0970227	1.11062	0.151371	0.974246	-0.0376425	O00629	9	31.1	1.811e-148
IPI00295240	Isoform Mitochondrial of Cysteine desulfurase, mitochondrial	1.06955	0.097007	0.874285	-0.193824	1.10542	0.144595	Q9Y697-1	3	8.3	2.097e-13
IPI00939523	117 kDa protein	1.06934	0.0967252	0.932196	-0.101295	1.02921	0.0415429		34	40.9	0
IPI00013949	Small glutamine-rich tetratricopeptide repeat-containing protein alpha	1.06915	0.0964589	1.10198	0.140103	1.01441	0.0206476	O43765	3	11.8	0.00725
IPI00054042	Isoform 1 of General transcription factor II-I	1.06908	0.0963649	0.857648	-0.221543	1.36085	0.444508	P78347-1	43	56.9	2.5286e-292
IPI00020008	NEDD8	1.069	0.0962553	1.55546	0.637344	0.580934	-0.783554	Q15843	1	17.3	0.032288
IPI00000948	Transducin beta-like protein 2	1.06874	0.0959106	0.696569	-0.521662	1.41207	0.497812	Q9Y4P3	6	15	4.5146e-16
IPI00790342	60S ribosomal protein L6	1.06826	0.095268	1.00335	0.00482222	1.06909	0.0963897	B2R4K7	15	47.1	8.5891e-168
IPI00844000	UPF0555 protein KIAA0776	1.06822	0.0952053	1.32022	0.400778	0.792706	-0.335142	O94874	6	13.5	5.1283e-61
IPI00793375	Xaa-Pro aminopeptidase 1	1.06815	0.0951113	0.75563	-0.404248	1.06294	0.0880662	Q9NQW7-1	7	17.7	2.5951e-75
IPI00328753	Isoform 1 of Kinectin	1.0677	0.0944997	1.09012	0.124493	1.00154	0.00221655	Q86UP2-1	70	60.4	0
IPI00221091	40S ribosomal protein S15a	1.06751	0.0942487	1.2916	0.369159	0.873035	-0.195889	P62244	4	30.8	1.9738e-41
IPI00008986	Large neutral amino acids transporter small subunit 1	1.0672	0.0938251	1.06101	0.0854411	1.06189	0.0866308	Q01650	10	27	1.0097e-183
IPI00871890	Putative uncharacterized protein PICALM	1.0672	0.0938251	1.02316	0.0330358	1.05708	0.0800879	A8K5U9	12	30.3	2.4918e-160
IPI00003505	Isoform 1 of Thyroid receptor-interacting protein 13	1.06699	0.0935426	1.40908	0.494751	0.891053	-0.166416	Q15645-1	10	36.8	1.3597e-65
IPI00013146	28S ribosomal protein S22, mitochondrial	1.06674	0.093213	0.678644	-0.559273	1.3006	0.379173	P82650	6	23.6	4.6674e-19
IPI00305438	Isoform 1 of Vacuolar protein sorting-associated protein 16 homolog	1.06631	0.0926321	1.07165	0.0998366	0.819796	-0.286663	Q9H269-1	3	5.7	0.070141
IPI00251559	E3 ubiquitin-protein ligase BRE1A	1.06617	0.0924436	0.932018	-0.101571	1.10763	0.147476	Q5VTR2	13	17.1	2.4028e-130
IPI00016637	3-oxoacyl-[acyl-carrier-protein] synthase, mitochondrial	1.06613	0.0923808	0.923966	-0.114088	1.08697	0.120311	Q9NWU1	4	15.7	1.8668e-74
IPI00065500	BRO1 domain-containing protein BROX	1.06587	0.0920352	1.48987	0.575187	0.617394	-0.695737	Q5VW32	2	10.9	3.9556e-29
IPI00796062	Putative uncharacterized protein COX17	1.06578	0.0919095	0.975098	-0.0363808	1.15501	0.207901	C9J8T6	2	29.6	1.0796e-14
IPI00641181	MARCKS-related protein	1.06572	0.0918309	0.808501	-0.306678	1.38286	0.467651	P49006	2	14.4	1.1253e-05
IPI00298994	Talin-1	1.06566	0.0917523	1.23109	0.299933	0.910436	-0.13537	Q9Y490	123	66.5	0
IPI00152377	Dolichyl-diphosphooligosaccharide--protein glycosyltransferase subunit STT3B	1.0655	0.0915323	1.14813	0.199287	1.00096	0.00138574	Q8TCJ2	13	16.3	1.6603e-60
IPI00008223	UV excision repair protein RAD23 homolog B	1.0654	0.0913909	0.988901	-0.0161016	1.12233	0.166501	P54727	13	41.8	7.4068e-126
IPI00018873	Nicotinamide phosphoribosyltransferase	1.06504	0.0909035	1.39812	0.483491	0.752114	-0.410976	P43490	18	54	6.3498e-302
IPI00299155	Proteasome subunit alpha type-4	1.06403	0.0895349	1.26725	0.341704	0.888862	-0.169968	P25789	8	46.7	2.7084e-52
IPI00878252	Isoform 1 of General transcription factor 3C polypeptide 2	1.06388	0.0893303	0.661719	-0.59571	1.59168	0.670548	Q8WUA4-1	1	3.4	2.0148e-18
IPI00016339	Ras-related protein Rab-5C	1.06385	0.0892988	0.939974	-0.0893075	1.12166	0.165636	P51148	10	65.3	2.1479e-176
IPI00030363	Acetyl-CoA acetyltransferase, mitochondrial	1.06361	0.0889682	0.989764	-0.0148435	1.11561	0.157828	P24752	14	50.4	0
IPI00004472	Isoform 1 of Serine/threonine-protein kinase WNK1	1.06325	0.0884801	2.04405	1.03143	0.537872	-0.894664	Q9H4A3-1	6	3.1	7.532e-16
IPI00784414	Isoform 1 of Signal transducer and activator of transcription 3	1.06291	0.0880232	1.10394	0.142664	1.03815	0.0540164	P40763-1	1	2.3	2.3895e-42
IPI00384176	Isoform 1 of Protein polybromo-1	1.06281	0.0878814	1.22013	0.287038	0.883952	-0.177961	Q86U86-1	21	19.9	5.0049e-145
IPI00300074	Phenylalanyl-tRNA synthetase beta chain	1.06243	0.0873614	1.17031	0.226897	0.884134	-0.177663	Q9NSD9	11	20.7	8.286e-14
IPI00004671	Golgin subfamily B member 1	1.06209	0.0869042	0.930388	-0.104095	1.19575	0.257919	Q14789	140	53.7	0
IPI00791262	24 kDa protein	1.06207	0.0868727	1.16903	0.225309	0.778743	-0.360781	Q14197	1	6.6	0.022513
IPI00186290	Elongation factor 2	1.06158	0.0862103	1.10155	0.139529	0.979147	-0.0304031	P13639	50	66.1	0
IPI00023234	SUMO-activating enzyme subunit 2	1.06154	0.086163	1.0342	0.0485151	0.929022	-0.106216	Q9UBT2	22	55.2	1.9371e-238
IPI00257903	Endoplasmic reticulum metallopeptidase 1	1.06153	0.0861472	0.957269	-0.0630038	0.820949	-0.284635	Q7Z2K6	5	7.3	1.5265e-07
IPI00412579	60S ribosomal protein L10a	1.06129	0.0858159	1.00792	0.0113837	1.02239	0.0319469	P62906	10	53.5	3.9925e-64
IPI00922443	cDNA FLJ59210, highly similar to Tubulin-specific chaperone E	1.06115	0.0856265	0.936057	-0.095331	1.1773	0.235484	B7Z3P1	6	15.2	1.8926e-31
IPI00797766	KIAA0864 protein	1.06111	0.0855792	0.699773	-0.51504	1.05093	0.0716695	Q9Y6X7	12	12.4	3.3587e-113
IPI00759799	HBeAg-binding protein 2 binding protein A	1.06099	0.0854055	0.919611	-0.120904	1.08236	0.114176	Q1HDL3	4	17.4	6.4752e-42
IPI00291922	Proteasome subunit alpha type-5	1.06087	0.0852477	1.1486	0.199872	0.989429	-0.0153317	P28066	9	52.3	2.1202e-170
IPI00015947	DnaJ homolog subfamily B member 1	1.06085	0.0852161	0.62921	-0.668387	1.75956	0.815216	P25685	3	10.9	6.9001e-07
IPI00329600	Probable saccharopine dehydrogenase	1.06059	0.0848688	0.869465	-0.2018	1.16346	0.218426	Q8NBX0	9	35.7	8.9359e-105
IPI00028931	Desmoglein-2	1.05989	0.0839211	0.709879	-0.494354	1.11426	0.156087	Q14126	7	10.7	1.5647e-57
IPI00926581	myosin, heavy chain 14 isoform 3	1.0593	0.0831151	1.41387	0.49965	0.801288	-0.319608	B0I1S2	11	5.1	1.0844e-149
IPI00018260	Armadillo repeat-containing protein 1	1.05923	0.0830203	0.646669	-0.6289	1.47357	0.559318	Q9NVT9	2	15.6	0.00016538
IPI00215914	ADP-ribosylation factor 1	1.05914	0.0828938	1.23055	0.299307	0.912925	-0.131431	P84077	11	61.3	1.2078e-195
IPI00017367	Radixin, isoform CRA_a	1.05853	0.0820555	1.2021	0.265554	0.885874	-0.174827	A7YIJ8	28	48	0
IPI00893949	Major histocompatibility complex, class I, A	1.0585	0.0820239	1.25915	0.332445	1.15385	0.20646	A0N0E2	7	28.3	1.3724e-66
IPI00395605	Isoform 3 of Rho guanine nucleotide exchange factor 1	1.05846	0.0819606	1.27324	0.3485	0.827273	-0.273565	Q92888-3	15	23.2	2.3111e-136
IPI00479058	40S ribosomal protein S15	1.05837	0.0818499	1.18194	0.241158	1.02018	0.0288247	P62841	5	64.1	4.0499e-175
IPI00002926	Vacuolar protein sorting-associated protein 37B	1.05834	0.0818024	1.20065	0.263811	0.999327	-0.000970811	Q9H9H4	1	8.8	0.02194
IPI00871717	17 kDa protein	1.05804	0.0813909	1.26383	0.337801	0.656294	-0.607585		2	16.2	1.4979e-12
IPI00291200	Nuclear pore complex protein Nup133	1.05788	0.0811693	1.1479	0.198995	0.945041	-0.0815507	Q8WUM0	30	41.4	0
IPI00876864	ribonuclease P/MRP 30kDa subunit isoform a	1.0577	0.0809319	1.19662	0.258966	0.92193	-0.117271	C9JJX7	4	20.2	1.4364e-64
IPI00642256	Isoform 2 of F-actin-capping protein subunit beta	1.05769	0.080916	1.14698	0.197841	0.928109	-0.107634	P47756-2	16	68	1.1755e-86
IPI00030702	Isoform 1 of Isocitrate dehydrogenase [NAD] subunit alpha, mitochondrial	1.05753	0.0806944	1.21537	0.281392	0.869229	-0.202191	P50213-1	12	41.3	1.8038e-164
IPI00386258	Isoform 1 of Mitochondrial carrier homolog 1	1.05743	0.0805677	0.88702	-0.172961	1.35153	0.434591	Q9NZJ7-1	1	10	0.00021336
IPI00647286	hypothetical protein LOC64855 isoform 1	1.0567	0.0795696	1.10467	0.143612	0.948424	-0.0763959	Q4LE55	20	38.7	0
IPI00011253	40S ribosomal protein S3	1.05664	0.0794904	1.02468	0.0351774	1.10782	0.147727	P23396	14	67.5	6.0144e-180
IPI00027230	Endoplasmin	1.05641	0.0791734	0.992544	-0.0107973	1.08534	0.118141	P14625	60	68.5	0
IPI00015195	Cleavage stimulation factor 77 kDa subunit	1.05639	0.0791417	1.08303	0.115075	1.09792	0.134779	Q12996	14	29.7	9.1191e-218
IPI00470528	60S ribosomal protein L15	1.05637	0.07911	1.05427	0.076251	1.02806	0.0399255	P61313	10	43.1	1.1208e-126
IPI00013296	40S ribosomal protein S18	1.05595	0.0785392	1.1036	0.142217	1.00894	0.0128363	P62269	11	57.2	6.9409e-32
IPI00019226	Isoform 1 of Bromodomain-containing protein 8	1.05563	0.0781109	1.19547	0.257578	0.972228	-0.0406341	Q9H0E9-1	3	4	1.8327e-09
IPI00166555	114 kDa protein	1.05561	0.0780792	1.16692	0.222704	0.736431	-0.441378	Q5T8P6-1	6	7.6	1.2061e-45
IPI00022774	Transitional endoplasmic reticulum ATPase	1.05543	0.0778253	1.05908	0.0828133	1.04834	0.0681032	P55072	56	78.8	0
IPI00641924	28S ribosomal protein S9, mitochondrial	1.05515	0.0774445	0.967087	-0.048282	1.03498	0.0496026	P82933	3	11.1	1.6957e-07
IPI00000728	Isoform 1 of Ubiquitin carboxyl-terminal hydrolase 15	1.0551	0.077381	1.19987	0.262873	0.96108	-0.0572714	Q9Y4E8-1	12	19	2.868e-19
IPI00012268	26S proteasome non-ATPase regulatory subunit 2	1.05501	0.077254	0.941275	-0.0873122	1.10359	0.14221	Q13200	45	66.2	0
IPI00297982	Eukaryotic translation initiation factor 2 subunit 3	1.05489	0.0770953	1.06281	0.0878782	1.0123	0.0176378	P41091	14	43	7.9517e-141
IPI00296535	2-hydroxyacyl-CoA lyase 1	1.05397	0.0758406	0.540133	-0.888614	1.23765	0.307605	Q9UJ83	4	11.8	1.8967e-08
IPI00930710	solute carrier family 25, member 13 isoform 1	1.0536	0.0753321	0.960487	-0.0581621	1.00846	0.0121491	Q546F9	24	50.4	0
IPI00003515	Thyroid receptor-interacting protein 11	1.05356	0.0752685	1.04824	0.0679634	0.986066	-0.0202443	Q15643	17	13.2	4.7207e-156
IPI00026530	Protein ERGIC-53	1.05302	0.0745372	1.12158	0.165531	0.918326	-0.122922	P49257	18	46.3	1.2229e-182
IPI00549232	Isoform 1 of Fibronectin type-III domain-containing protein 3a	1.05298	0.0744736	1.07695	0.106953	1.06496	0.0908027	Q9Y2H6-1	7	7.8	5.4638e-35
IPI00472939	Signal peptidase complex subunit 2	1.05295	0.0744418	1.19394	0.255726	0.865789	-0.207913	Q15005	6	38.5	8.728e-119
IPI00069084	Isoform 1 of Transformation/transcription domain-associated protein	1.05294	0.0744259	0.843625	-0.245326	1.09283	0.12807	Q9Y4A5-1	45	18.9	0
IPI00022542	Rho-associated protein kinase 1	1.05264	0.0740123	0.956968	-0.0634579	1.07774	0.108014	Q13464	12	11.4	2.6721e-191
IPI00925656	28S ribosomal protein S17, mitochondrial precursor	1.05262	0.0739805	0.926431	-0.110245	1.27523	0.350753	Q8IY71	3	20.9	1.4356e-20
IPI00221232	Guanine nucleotide-binding protein G(I)/G(S)/G(O) subunit gamma-12	1.05242	0.07371	0.787974	-0.34378	1.10753	0.147351	Q9UBI6	2	37.5	4.5391e-10
IPI00376317	Isoform 1 of Enhancer of mRNA-decapping protein 4	1.05236	0.0736304	1.15027	0.201969	0.768509	-0.379867	Q6P2E9-1	18	22.2	5.5249e-61
IPI00848226	Guanine nucleotide-binding protein subunit beta-2-like 1	1.05222	0.0734395	1.12521	0.170192	0.938939	-0.0908965	P63244	18	80.1	0
IPI00154473	Isoform 1 of Elongation factor G, mitochondrial	1.05215	0.073344	0.780676	-0.357205	1.30088	0.379492	Q96RP9-1	13	23	2.114e-84
IPI00008490	Protein unc-93 homolog B1	1.0519	0.0729938	0.662965	-0.592996	1.52854	0.612155	Q9H1C4	2	5.2	0.10349
IPI00027497	Glucose-6-phosphate isomerase	1.05162	0.0726117	1.18421	0.24393	0.927753	-0.108187	P06744	22	54.1	0
IPI00020075	Abhydrolase domain-containing protein 10, mitochondrial	1.05122	0.0720701	1.26668	0.341049	0.767355	-0.382033	Q9NUJ1	9	43.1	3.4658e-117
IPI00185919	Isoform 1 of La-related protein 1	1.04868	0.0685772	1.173	0.230202	0.893148	-0.163029	Q6PKG0-1	23	30.4	3.1473e-166
IPI00221089	40S ribosomal protein S13	1.04868	0.0685772	1.1253	0.170315	1.032	0.045444	P62277	7	43	5.716e-45
IPI00013917	40S ribosomal protein S12	1.04835	0.068114	1.16648	0.222162	0.885412	-0.175579	P25398	5	48.5	4.2936e-118
IPI00217563	Isoform Beta-1A of Integrin beta-1	1.04766	0.0671713	1.11175	0.152829	1.04882	0.0687643	P05556-1	18	32.1	9.395e-136
IPI00552920	Exosome complex exonuclease RRP43	1.04745	0.0668835	0.962952	-0.0544645	1.15116	0.203092	Q96B26	4	24.6	1.116e-35
IPI00084571	Isoform 2 of 39S ribosomal protein L39, mitochondrial	1.04744	0.0668676	0.945068	-0.0815101	0.982702	-0.0251737	Q9NYK5-2	3	11.9	8.779e-08
IPI00294501	7-dehydrocholesterol reductase	1.04738	0.0667876	0.919926	-0.12041	1.26052	0.334022	Q9UBM7	6	15.2	1.1144e-47
IPI00103994	Leucyl-tRNA synthetase, cytoplasmic	1.04728	0.0666437	1.26236	0.336128	0.881501	-0.181966	Q9P2J5	44	52.6	0
IPI00414482	Isoform 1 of General transcription factor 3C polypeptide 1	1.04707	0.0663559	0.877764	-0.188096	1.11522	0.157331	Q12789-2	46	33	0
IPI00016610	Poly(rC)-binding protein 1	1.04698	0.0662279	0.946204	-0.0797761	1.22622	0.294213	Q15365	12	70.5	8.571e-140
IPI00018813	Isoform 2 of COP9 signalosome complex subunit 2	1.04684	0.066036	1.00462	0.00665221	1.20238	0.265897	P61201-2	11	35.1	1.1963e-180
IPI00796366	cDNA FLJ56329, highly similar to Myosin light polypeptide 6	1.04674	0.065908	1.13392	0.181315	0.853488	-0.228557	B7Z6Z4	5	26.9	4.1702e-29
IPI00930241	EBNA1 binding protein 2 isoform 1	1.04592	0.0647716	0.852389	-0.230416	1.43648	0.522537	Q99848	4	11.9	3.247e-07
IPI00413108	33 kDa protein	1.0459	0.0647396	1.07124	0.0992834	1.04411	0.0622726	P08865	15	61.3	0
IPI00023919	26S protease regulatory subunit 8	1.04586	0.0646916	1.01985	0.0283555	1.01211	0.0173638	P62195	25	66	0
IPI00218465	Phospholipase A-2-activating protein	1.04549	0.0641791	1.03772	0.0534161	1.04123	0.0582835	Q9Y263	12	23.9	4.0533e-211
IPI00916503	cDNA FLJ55789, highly similar to Rattus norvegicus basic leucine zipper and W2 domains 1 (Bzw1), mRNA	1.04548	0.0641631	1.23767	0.307631	0.902979	-0.147236	B4DLZ8	9	28.6	7.8905e-17
IPI00333010	Calcium homeostasis endoplasmic reticulum protein	1.04547	0.0641471	1.09462	0.130425	1.10158	0.139569	Q8IWX8	15	23.4	6.4159e-185
IPI00646182	Na+/K+ -ATPase alpha 1 subunit isoform c	1.04535	0.0639869	0.957378	-0.0628387	1.07794	0.108271	B7Z2T5	42	46.6	0
IPI00761160	Isoform 6 of Calpastatin	1.04526	0.0638587	1.58271	0.6624	0.638805	-0.646554	P20810-6	5	9.4	8.8247e-58
IPI00015924	Isoform 1 of Tuftelin-interacting protein 11	1.04468	0.0630575	0.904206	-0.145277	1.25178	0.323979	Q9UBB9-1	2	4.9	0.012823
IPI00023322	Zinc finger protein ubi-d4	1.04447	0.0627689	0.754315	-0.406761	1.09754	0.134273	Q92785	2	6.1	2.4291e-15
IPI00016249	Isoform 1 of Fragile X mental retardation syndrome-related protein 1	1.04433	0.0625765	1.13834	0.186932	0.947819	-0.0773172	P51114-1	11	30.3	2.4535e-119
IPI00010845	NADH dehydrogenase [ubiquinone] iron-sulfur protein 8, mitochondrial	1.04433	0.0625765	0.985546	-0.0210044	0.935172	-0.0966963	O00217	2	10	6.1401e-07
IPI00015602	Mitochondrial import receptor subunit TOM70	1.0439	0.0619831	0.985519	-0.0210445	1.13973	0.188688	O94826	23	58.6	0
IPI00743931	cDNA FLJ59712, highly similar to Golgi reassembly-stacking protein 2	1.04389	0.061967	1.16823	0.224329	1.06813	0.0950923	Q9H8Y8-2	3	11.6	1.3766e-11
IPI00021263	14-3-3 protein zeta/delta	1.04388	0.061951	1.19243	0.253905	0.87266	-0.196508	P63104	19	75.9	0
IPI00010676	Isoform 1 of Urokinase plasminogen activator surface receptor	1.04388	0.061951	0.82366	-0.279879	0.984528	-0.0224956	Q03405-1	4	16.1	2.1982e-28
IPI00021518	Isoform 1 of DNA damage-binding protein 2	1.04376	0.0617905	0.772103	-0.373134	1.28474	0.361476	Q92466-1	3	9.6	2.7505e-06
IPI00300299	Signal peptidase complex subunit 3	1.04374	0.0617584	1.34135	0.423684	0.917759	-0.123813	P61009	3	17.8	4.6583e-09
IPI00917297	Putative uncharacterized protein CWC22	1.04355	0.0615017	1.0949	0.130804	1.06909	0.0963897	B7WP27	1	2.2	1.6455e-53
IPI00299254	Eukaryotic translation initiation factor 5B	1.04352	0.0614536	0.932538	-0.100765	1.0321	0.0455784	O60841	32	38.9	1.9603e-220
IPI00001738	Nuclear pore complex protein Nup88	1.04345	0.0613573	0.908314	-0.138737	0.980396	-0.0285636	Q99567	8	19.7	4.285e-31
IPI00010346	Neurolysin, mitochondrial	1.04332	0.0611807	1.05663	0.0794705	0.974246	-0.0376425	Q9BYT8	6	13.9	8.5685e-28
IPI00030131	Isoform Beta of Lamina-associated polypeptide 2, isoforms beta/gamma	1.04328	0.0611326	1.14673	0.197531	0.904988	-0.14403	P42167-1	18	56.6	9.6871e-210
IPI00295542	Nucleobindin-1	1.04318	0.0609881	0.84509	-0.242822	1.33298	0.414656	Q02818	7	21.5	3.6669e-26
IPI00929344	phosphoribosylformylglycinamidine synthase	1.04294	0.060651	1.16932	0.225664	0.940188	-0.0889783	A8K8N7	34	43.6	7.6024e-171
IPI00641364	PPAN-P2RY11 protein	1.04279	0.0604422	0.828959	-0.270627	1.36911	0.453243	C9J3F9	4	6.5	1.2724e-11
IPI00220739	Membrane-associated progesterone receptor component 1	1.04226	0.0597194	0.986299	-0.0199023	1.18259	0.241946	O00264	6	46.2	2.5662e-57
IPI00247871	Isoform 1 of Transcription elongation regulator 1	1.04222	0.0596551	0.925075	-0.112358	1.16635	0.221996	O14776-1	22	22	6.6279e-32
IPI00026337	Isoform 1 of Ran-binding protein 3	1.04183	0.0591248	0.963636	-0.0534391	1.12253	0.166748	Q9H6Z4-1	4	10.1	4.6871e-41
IPI00937615	Elongation factor 1-gamma	1.0418	0.0590765	1.13998	0.189013	0.926658	-0.109892	P26641	27	61.8	2.6321e-193
IPI00926648	Putative uncharacterized protein APEH	1.04179	0.0590605	1.12652	0.171876	0.976168	-0.0347992	C9JIF9	5	8.3	6.6172e-74
IPI00182757	Isoform 1 of Protein KIAA1967	1.04153	0.0587068	0.962938	-0.054485	1.19191	0.253274	Q8N163-1	33	51.8	0
IPI00554737	Serine/threonine-protein phosphatase 2A 65 kDa regulatory subunit A alpha isoform	1.04095	0.0579026	1.00747	0.0107367	1.01345	0.0192803	P30153	22	53.1	0
IPI00000690	Isoform 1 of Apoptosis-inducing factor 1, mitochondrial	1.04088	0.0578061	1.01981	0.0282974	1.03642	0.0516106	O95831-1	22	46.7	0
IPI00925413	EIF4G1 protein	1.04049	0.057259	1.206	0.270231	0.878522	-0.18685	B2RU10	46	36.3	0
IPI00396627	Isoform 1 of Zinc phosphodiesterase ELAC protein 2	1.0399	0.056438	0.624718	-0.678722	1.48808	0.573456	Q9BQ52-1	20	39.6	3.8638e-127
IPI00028004	Proteasome subunit beta type-3	1.03984	0.0563574	1.3287	0.410011	0.734192	-0.445771	P49720	5	36.1	1.7479e-87
IPI00007752	Tubulin beta-2C chain	1.03976	0.0562447	1.17329	0.230555	0.932664	-0.100571	P68371	24	72.6	0
IPI00034006	Tyrosine-protein phosphatase non-receptor type 23	1.03955	0.0559548	1.42044	0.506341	0.778291	-0.361618	Q9H3S7	10	10.1	7.9047e-81
IPI00019004	Translocation protein SEC62	1.03905	0.0552619	0.944726	-0.0820328	1.18614	0.246277	Q99442	2	5.5	0.00079751
IPI00093057	Coproporphyrinogen-III oxidase, mitochondrial	1.03885	0.0549879	0.925993	-0.110927	1.20671	0.271076	P36551	8	24.9	1.7596e-58
IPI00017283	Isoleucyl-tRNA synthetase, mitochondrial	1.03877	0.0548751	1.01629	0.0233102	1.00135	0.00193967	Q9NSE4	38	50.8	0
IPI00102815	Nucleolar complex protein 3 homolog	1.0386	0.0546332	1.08021	0.111313	0.89851	-0.154393	Q8WTT2	13	23.2	1.3744e-126
IPI00059368	Protein RFT1 homolog	1.03847	0.0544558	1.01774	0.0253692	0.988084	-0.0172947	Q96AA3	2	4.8	2.5217e-86
IPI00025273	Isoform Long of Trifunctional purine biosynthetic protein adenosine-3	1.03841	0.0543752	1.12741	0.173016	0.889237	-0.16936	P22102-1	25	34.4	5.1221e-172
IPI00299033	Importin subunit alpha-3	1.03828	0.0541978	0.735021	-0.444143	1.26667	0.341044	O00505	11	38	8.7109e-128
IPI00396435	Putative pre-mRNA-splicing factor ATP-dependent RNA helicase DHX15	1.03821	0.054101	0.967567	-0.0475672	1.03777	0.0534821	O43143	37	55.8	0
IPI00070643	Isoform Long of FAS-associated factor 1	1.03817	0.0540365	0.780005	-0.358446	0.742245	-0.430033	Q9UNN5-1	5	11.8	1.8192e-13
IPI00472442	Isoform Long of Proteasome subunit alpha type-1	1.03808	0.0539236	1.20299	0.266622	1.05833	0.0817919	P25786-2	12	67.7	3.5151e-60
IPI00256861	Isoform 2 of Microtubule-actin cross-linking factor 1, isoforms 1/2/3/5	1.03778	0.0535041	0.989682	-0.0149633	1.08534	0.118141	Q9UPN3-2	148	37.1	0
IPI00013167	28S ribosomal protein S25, mitochondrial	1.03774	0.0534396	0.930183	-0.104414	1.07525	0.104665	P82663	4	27.7	7.2096e-07
IPI00025721	COP9 signalosome complex subunit 3	1.0368	0.0521319	0.861454	-0.215154	1.09283	0.12807	Q9UNS2	7	28.4	3.4382e-171
IPI00938079	programmed cell death 6 interacting protein isoform 2	1.03666	0.051938	1.3075	0.386809	0.8441	-0.244515	B4DHD2	24	37.2	0
IPI00000494	60S ribosomal protein L5	1.03658	0.0518249	1.10793	0.147862	0.99385	-0.0089004	P46777	14	45.1	1.4913e-135
IPI00090327	Vacuolar protein sorting-associated protein 45	1.03639	0.0515664	1.25798	0.331111	0.783692	-0.351641	Q9NRW7	5	10.4	7.6482e-05
IPI00027834	Heterogeneous nuclear ribonucleoprotein L	1.03613	0.0512109	0.724805	-0.464334	1.36988	0.454052	P14866	14	43	1.0146e-137
IPI00172656	FAS-associated factor 2	1.03612	0.0511948	1.12373	0.168294	0.93275	-0.100437	Q96CS3	11	32.6	1.2431e-90
IPI00297626	Syntaxin-binding protein 3	1.03557	0.0504188	1.03987	0.0564019	1.05862	0.0821849	O00186	6	16.6	1.0245e-92
IPI00027717	Component of gems 4	1.0353	0.0500468	1.00543	0.00781198	1.13992	0.188932	P57678	4	7.6	1.8821e-20
IPI00746934	Isoform 2 of E3 ubiquitin-protein ligase UBR4	1.03525	0.0499821	1.23013	0.298809	0.829262	-0.2701	Q5T4S7-2	67	20.9	0
IPI00221234	aldehyde dehydrogenase 7 family, member A1	1.03495	0.0495614	0.934401	-0.097887	1.05718	0.0802191	P49419	9	30.6	1.9781e-104
IPI00719752	Isoform 2 of Eukaryotic translation initiation factor 3 subunit B	1.0349	0.0494967	1.12843	0.174312	0.991832	-0.0118329	P55884-2	31	52.1	0
IPI00298406	Isoform 2 of Hydroxyacyl-coenzyme A dehydrogenase, mitochondrial	1.03476	0.0493025	0.743059	-0.428451	1.17182	0.228756	Q16836-2	7	37.9	1.8785e-57
IPI00290142	CTP synthase 1	1.03475	0.0492863	1.22944	0.298006	0.846934	-0.239678	P17812	21	53.5	2.8268e-209
IPI00031522	Trifunctional enzyme subunit alpha, mitochondrial	1.03457	0.0490274	0.961719	-0.0563121	1.07957	0.110456	P40939	32	57.7	0
IPI00010349	Alkyldihydroxyacetonephosphate synthase, peroxisomal	1.03432	0.0486874	0.966252	-0.0495286	0.987123	-0.0186985	O00116	20	52.3	6.4949e-233
IPI00217975	Lamin-B1	1.03428	0.0486227	0.922706	-0.116057	1.12406	0.168723	P20700	8	19.1	1.1444e-93
IPI00026268	Guanine nucleotide-binding protein G(I)/G(S)/G(T) subunit beta-1	1.03427	0.0486065	1.02902	0.0412762	0.970786	-0.0427747	P62873	11	38.2	3.0812e-101
IPI00218187	Isoform Gamma-2 of Serine/threonine-protein phosphatase PP1-gamma catalytic subunit	1.03394	0.048153	0.817963	-0.289892	1.13963	0.188567	P36873-2	12	53.4	7.3165e-293
IPI00217056	Isoform 1 of Prolyl 3-hydroxylase 3	1.03362	0.0476995	0.58131	-0.782622	1.47886	0.564484	Q8IVL6-1	7	13.9	1.228e-25
IPI00005179	Isoform 1 of DNA-directed RNA polymerases I and III subunit RPAC1	1.03351	0.0475536	1.23754	0.307472	0.766308	-0.384004	O15160-1	3	19.1	8.0503e-28
IPI00072534	Isoform 1 of Protein unc-45 homolog A	1.03351	0.0475536	1.21022	0.275267	0.908207	-0.138907	Q9H3U1-1	8	14	6.5999e-72
IPI00292135	Lamin-B receptor	1.03351	0.0475536	1.1746	0.232171	1.01826	0.0261041	Q14739	12	26.8	1.5899e-112
IPI00301434	BolA-like protein 2	1.03346	0.0474888	1.63174	0.706408	0.678628	-0.559308	Q9H3K6-1	2	16.4	4.5415e-05
IPI00219018	Glyceraldehyde-3-phosphate dehydrogenase	1.03333	0.0472944	1.15576	0.20884	0.936527	-0.0946075	P04406	20	79.4	0
IPI00796333	45 kDa protein	1.03288	0.0466784	1.11225	0.153486	1.03354	0.0475919	P04075	23	74.4	0
IPI00337494	Isoform 1 of Calcium-binding mitochondrial carrier protein SCaMC-1	1.0328	0.0465649	1.16207	0.216699	0.881741	-0.181573	Q6NUK1-1	21	56	1.2749e-265
IPI00219365	Moesin	1.03278	0.0465325	1.17753	0.235766	0.953546	-0.0686255	P26038	39	64.3	0
IPI00305303	Ufm1-specific protease 2	1.03278	0.0465325	1.13941	0.188285	0.691601	-0.531988	Q9NUQ7	2	6.4	4.5478e-20
IPI00383581	cDNA FLJ61290, highly similar to Neutral alpha-glucosidase AB	1.03252	0.0461757	1.04261	0.0601966	0.991351	-0.0125319	Q14697-1	55	70.2	0
IPI00297593	Isoform 1 of Ubiquitin carboxyl-terminal hydrolase 34	1.03233	0.0459	0.893867	-0.161867	1.10013	0.13768	Q70CQ2-1	16	7.6	1.5792e-135
IPI00607732	Isoform 2 of Nicalin	1.03228	0.0458351	1.02188	0.0312196	1.04872	0.0686321	Q969V3-2	16	41.1	9.2695e-90
IPI00952909	Isoform 1 of Septin-11	1.03222	0.045754	1.02949	0.0419288	0.857034	-0.222575	Q9NVA2-1	10	28.4	6.6991e-106
IPI00001757	Isoform 1 of RNA-binding protein 8A	1.03203	0.0454782	1.31723	0.397512	0.667423	-0.583327	Q9Y5S9-1	4	31	9.7199e-51
IPI00789155	cDNA FLJ31776 fis, clone NT2RI2008141, highly similar to CALUMENIN	1.03182	0.045186	1.06174	0.0864276	1.02383	0.0339796	B3KPG9	23	70.6	0
IPI00376798	Isoform 1 of 60S ribosomal protein L11	1.03162	0.0449101	1.09712	0.133724	1.0812	0.112638	P62913-1	8	47.2	1.4829e-41
IPI00412672	Isoform 2 of Serine/threonine-protein kinase N1	1.03134	0.0445205	1.4581	0.54409	0.661849	-0.595426	Q16512-2	2	4	2.2376e-05
IPI00790530	Nucleoporin NUP85	1.031	0.0440495	0.977152	-0.0333449	0.927782	-0.108142	Q9BW27	9	21.3	9.9521e-118
IPI00002203	Isoform 1 of BRCA2 and CDKN1A-interacting protein	1.03095	0.0439683	0.907944	-0.139324	1.12368	0.16823	Q9P287-1	7	38.9	2.0822e-86
IPI00465028	triosephosphate isomerase 1 isoform 2	1.03086	0.0438546	1.19591	0.258107	0.932395	-0.100987	Q53HE2	14	65.4	0
IPI00926977	proteasome 26S ATPase subunit 6	1.03056	0.0434322	1.04929	0.0694139	0.983375	-0.0241865	P62333	15	48.4	4.2412e-73
IPI00027270	60S ribosomal protein L26	1.03039	0.0431884	1.2939	0.371726	0.840054	-0.251446	P61254	7	33.1	7.9243e-09
IPI00747764	cDNA FLJ53229, highly similar to Importin alpha-7 subunit	1.03004	0.0427008	1.09271	0.127914	0.929521	-0.10544	O60684	13	41.8	2.4069e-242
IPI00446767	Isoform 3 of Transducin-like enhancer protein 4	1.02991	0.0425219	0.94856	-0.0761894	1.34336	0.425846	Q04727-3	2	2.7	0.0021046
IPI00947127	lactate dehydrogenase A isoform 3	1.02969	0.0422129	1.1103	0.150944	0.901691	-0.149294	B7Z5E3	22	68.1	0
IPI00220503	dynactin 2	1.0296	0.0420828	1.36196	0.445682	0.817211	-0.291219	Q13561	13	49.5	0
IPI00922108	integrin alpha-V isoform 2	1.02948	0.0419202	1.08043	0.111605	0.873246	-0.19554	B7Z883	18	25.1	1.7342e-92
IPI00220158	Isoform 3 of Alpha-adducin	1.02944	0.0418551	1.05633	0.0790591	1.02172	0.0309974	P35611-3	9	15.9	6.385e-28
IPI00009904	Protein disulfide-isomerase A4	1.02869	0.0408136	0.890855	-0.166738	1.18585	0.245927	P13667	40	68.5	0
IPI00216260	Isoform 2 of Elongation factor Ts, mitochondrial	1.02843	0.0404392	0.783469	-0.352052	1.07726	0.107371	P43897-2	5	33.5	2.3273e-35
IPI00807545	Isoform 3 of Heterogeneous nuclear ribonucleoprotein K	1.02814	0.040032	0.840188	-0.251216	1.2118	0.277153	P61978-3	25	65.5	0
IPI00656021	vacuolar protein sorting 53 isoform 1	1.02742	0.0390218	0.849048	-0.236082	1.32251	0.403275	Q5VIR6-1	2	3.6	0.00033522
IPI00297452	Tyrosine-protein kinase receptor	1.02737	0.0389566	1.24014	0.310502	0.977321	-0.0330959	C9JJP5	4	5.6	0.00014117
IPI00163849	cDNA FLJ60624, highly similar to Epidermal growth factor receptor substrate 15-like 1	1.02731	0.0388751	1.03169	0.0450151	0.910869	-0.134685	B4DKA3	6	10.7	9.7404e-14
IPI00747797	Isoform 1 of tRNA (uracil-5-)-methyltransferase homolog	1.02701	0.0384512	1.06816	0.095128	1.00067	0.000970159	Q96GJ1-1	2	6.7	0.19505
IPI00292020	Spermidine synthase	1.02695	0.0383697	1.14709	0.197979	0.861868	-0.214461	P19623	4	15.6	6.8214e-09
IPI00031691	60S ribosomal protein L9	1.02686	0.0382392	1.10564	0.144881	0.911003	-0.134472	P32969	10	65.6	1.3702e-162
IPI00644712	ATP-dependent DNA helicase 2 subunit 1	1.02664	0.0379294	0.83278	-0.263993	1.27869	0.354661	P12956	39	63.5	0
IPI00479306	Proteasome subunit beta type-5	1.02616	0.0372604	1.2699	0.344709	0.815347	-0.294514	P28074	7	37.6	2.4084e-89
IPI00013895	Protein S100-A11	1.02568	0.0365749	1.23259	0.301697	0.800029	-0.321876	P31949	5	64.8	4.7011e-205
IPI00107122	Isoform 1 of Nucleoporin p58/p45	1.02554	0.0363789	1.26603	0.340316	0.781184	-0.356266	Q9BVL2-1	2	5.5	6.7347e-35
IPI00004968	Pre-mRNA-processing factor 19	1.02513	0.0358073	0.837737	-0.255431	1.20142	0.264743	Q9UMS4	19	78.4	4.3748e-179
IPI00298306	Isoform 1 of Serine-protein kinase ATM	1.02463	0.0351047	1.09034	0.124783	1.01163	0.0166787	Q13315-1	7	4.7	7.0095e-31
IPI00793155	Ras-related protein RAB34 isoform 5	1.02462	0.0350883	1.16303	0.217888	1.14309	0.19294	C9JI96	3	13	0.00010878
IPI00021808	Histidyl-tRNA synthetase, cytoplasmic	1.0246	0.0350557	1.22256	0.289901	0.93744	-0.0932018	P12081	18	46.8	4.2288e-209
IPI00441473	Protein arginine N-methyltransferase 5	1.02406	0.0343036	1.11338	0.154942	1.02883	0.0410039	O14744	14	38	7.8067e-62
IPI00010105	Eukaryotic translation initiation factor 6	1.02387	0.0340256	1.29914	0.377562	0.758159	-0.399428	P56537	8	51	1.9545e-43
IPI00018235	Peflin	1.02387	0.0340256	1.06804	0.0949616	0.910206	-0.135736	Q9UBV8	2	14.8	1.4793e-14
IPI00297261	Tyrosine-protein phosphatase non-receptor type 1	1.02353	0.0335512	1.07109	0.0990806	0.96848	-0.0462063	P18031	15	46.7	1.8198e-222
IPI00550020	Parathymosin	1.02346	0.033453	0.997159	-0.00410516	1.02172	0.0309974	P20962	2	22.5	1.2571e-35
IPI00024919	Thioredoxin-dependent peroxide reductase, mitochondrial	1.02341	0.0333876	1.02472	0.0352352	1.03652	0.0517443	P30048	7	40.2	4.8715e-175
IPI00647650	Eukaryotic translation initiation factor 3, subunit 3 gamma, 40kDa, isoform CRA_b	1.02333	0.033273	1.24043	0.310836	0.932241	-0.101225	B3KS98	6	22.4	1.2393e-22
IPI00306419	Lysophospholipid acyltransferase 5	1.02331	0.0332403	0.997131	-0.00414478	0.925303	-0.112003	Q6P1A2	7	19.5	4.3024e-21
IPI00216057	Sorbitol dehydrogenase	1.02305	0.0328802	1.08667	0.119919	0.913829	-0.130005	Q00796	3	16.8	4.0542e-11
IPI00376344	Isoform 1 of Myosin-Ib	1.02289	0.0326511	1.34364	0.426142	0.724918	-0.46411	O43795-1	14	18.6	9.4787e-200
IPI00926491	cDNA FLJ56092, highly similar to Pentatricopeptide repeat protein 1	1.02204	0.0314555	1.15058	0.202364	0.963483	-0.0536695	B4DJ38	2	3.2	1.2975e-29
IPI00442073	Cysteine and glycine-rich protein 1	1.02201	0.0314063	1.62297	0.698639	0.560782	-0.834487	P21291	6	42	7.5996e-42
IPI00022314	Superoxide dismutase [Mn], mitochondrial	1.02197	0.0313571	1.37868	0.463285	0.80048	-0.321062	P04179	2	12.6	1.4384e-57
IPI00903296	Isoform 6 of Serine/threonine-protein kinase MRCK alpha	1.02145	0.0306196	1.09353	0.128999	0.871209	-0.198909	Q5VT25-6	2	1.3	2.891e-34
IPI00002551	Isoform 1 of Anaphase-promoting complex subunit 4	1.02116	0.0302097	0.98074	-0.0280576	0.984624	-0.0223548	Q9UJX5-1	3	6.9	2.7895e-34
IPI00642971	Isoform 2 of Elongation factor 1-delta	1.02114	0.0301769	1.08247	0.114327	1.02623	0.0373609	P29692-2	10	24.3	4.9391e-179
IPI00026328	Thioredoxin domain-containing protein 12	1.02056	0.0293567	0.952901	-0.0696023	1.17749	0.235719	O95881	3	25.6	4.957e-28
IPI00030255	Procollagen-lysine,2-oxoglutarate 5-dioxygenase 3	1.02052	0.0293074	0.757739	-0.400228	1.31242	0.392225	O60568	24	48.6	0
IPI00015865	Poly(ADP-ribose) glycohydrolase ARH3	1.02039	0.0291269	1.47385	0.559588	0.445877	-1.16528	Q9NX46	2	10.5	0.21581
IPI00291646	Methylenetetrahydrofolate dehydrogenase (NADP+ dependent) 1-like	1.02038	0.0291105	0.711153	-0.491769	1.45531	0.541331	B7ZM99	13	24.9	2.8443e-124
IPI00550746	Nuclear migration protein nudC	1.02024	0.0289136	1.171	0.227741	0.899558	-0.152712	Q9Y266	23	70.4	1.0303e-241
IPI00413324	60S ribosomal protein L17	1.01995	0.0285032	0.998651	-0.00194726	1.01144	0.0164046	P18621	9	50	2.7866e-83
IPI00024403	Copine-3	1.01992	0.0284539	1.0346	0.049069	1.06977	0.0972972	O75131	11	23.8	4.4026e-33
IPI00871851	Isoform 2 of Septin-2	1.01957	0.0279612	0.958118	-0.0617248	0.909322	-0.137138	Q15019-2	7	29.8	3.4674e-118
IPI00453473	Histone H4	1.01938	0.0276984	1.66104	0.732088	0.695964	-0.522916	P62805	2	19.4	1.4333e-10
IPI00328257	Isoform A of AP-1 complex subunit beta-1	1.01934	0.0276327	0.991654	-0.0120917	0.983279	-0.0243274	Q10567-1	32	54	0
IPI00006579	Cytochrome c oxidase subunit 4 isoform 1, mitochondrial	1.01909	0.0272877	0.83378	-0.262262	1.26475	0.338853	P13073	4	26	4.2378e-13
IPI00178072	Cytospin-A	1.01908	0.0272712	1.5048	0.589568	0.674726	-0.567626	Q69YQ0	3	3.5	0.018972
IPI00419585	Peptidyl-prolyl cis-trans isomerase A	1.01904	0.0272055	1.08625	0.119356	0.958697	-0.0608533	P62937	14	75.2	1.8565e-225
IPI00640341	Isoform 1 of FK506-binding protein 8	1.0189	0.0270083	1.22283	0.290224	1.10725	0.146976	Q14318-1	10	35.4	4.6637e-108
IPI00334914	Isoform 1 of TRM1-like protein	1.01873	0.0267782	0.897017	-0.156793	1.26196	0.335671	Q7Z2T5-1	9	22.1	1.4555e-156
IPI00303568	Prostaglandin E synthase 2	1.01866	0.0266795	0.902001	-0.148799	1.11311	0.154593	Q9H7Z7	6	28.9	1.4264e-37
IPI00900293	filamin B isoform 1	1.01863	0.0266302	0.872094	-0.197444	1.17807	0.236426	B2ZZ83	172	83.4	0
IPI00294211	Pre-mRNA-splicing factor ATP-dependent RNA helicase PRP16	1.01862	0.0266138	0.960679	-0.0578742	1.04642	0.0654559	Q92620	13	13.8	3.22e-76
IPI00013195	39S ribosomal protein L49, mitochondrial	1.01857	0.026548	0.811281	-0.301727	1.18076	0.239717	Q13405	3	23.5	7.6453e-25
IPI00219913	Ubiquitin carboxyl-terminal hydrolase 14	1.01853	0.0264823	0.966635	-0.0489563	1.03527	0.0500044	P54578	25	66.2	2.6686e-187
IPI00894417	Transporter 1 ATP-binding cassette sub-family B	1.01826	0.0261041	0.787495	-0.344657	1.14693	0.197783	B1AZV3	3	6.6	7.6696e-10
IPI00009329	Utrophin	1.01821	0.0260383	1.1641	0.219212	0.878253	-0.187292	P46939	99	39.4	0
IPI00171798	Metastasis-associated protein MTA2	1.01817	0.0259725	0.895196	-0.159725	1.02883	0.0410039	O94776	23	44.9	1.5836e-149
IPI00023334	Isoform 1 of 39S ribosomal protein L4, mitochondrial	1.01804	0.0257915	0.936427	-0.0947613	0.898635	-0.154192	Q9BYD3-1	6	37.9	9.51e-62
IPI00025252	Protein disulfide-isomerase A3	1.01795	0.0256599	1.06161	0.0862601	0.990006	-0.0144912	P30101	37	72.1	0
IPI00395887	Thioredoxin-related transmembrane protein 1	1.01749	0.0250182	0.846391	-0.240603	1.25495	0.327629	Q9H3N1	5	19.6	3.4357e-15
IPI00890837	Isoform 1 of Structural maintenance of chromosomes flexible hinge domain-containing protein 1	1.0171	0.0244585	0.897044	-0.156749	1.101	0.138814	A6NHR9-1	8	7.3	3.1923e-119
IPI00008868	Microtubule-associated protein 1B	1.01676	0.023981	0.991626	-0.0121315	0.971555	-0.0416326	P46821	62	39.3	0
IPI00025019	Proteasome subunit beta type-1	1.01618	0.0231572	1.24236	0.31308	0.89261	-0.163898	P20618	6	35.3	2.443e-155
IPI00844264	upstream of NRAS isoform 3	1.01603	0.022943	1.11509	0.157158	0.815184	-0.294803	Q68DF1	18	25.6	1.9626e-207
IPI00014474	A-kinase anchor protein 8	1.01577	0.0225803	1.0645	0.0901813	1.06727	0.0939237	O43823	5	10.7	3.4746e-138
IPI00412224	Bromodomain and WD repeat-containing protein 2	1.01573	0.0225144	1.00532	0.00765477	1.16779	0.223778	Q9BZH6	7	10.1	8.149e-106
IPI00019380	Nuclear cap-binding protein subunit 1	1.01564	0.0223825	0.950408	-0.0733805	1.027	0.0384413	Q09161	18	35.3	4.9483e-190
IPI00008530	60S acidic ribosomal protein P0	1.01531	0.0219208	0.98493	-0.0219067	1.07467	0.103892	P05388	13	54.6	5.1093e-174
IPI00306290	Exportin-T	1.01512	0.0216568	1.11091	0.151744	0.936085	-0.0952886	O43592	20	29.6	4.0533e-155
IPI00915363	ribosomal protein S24 isoform d	1.01512	0.0216568	0.9787	-0.0310621	1.07054	0.0983336	P62847-1	4	13.5	1.1911e-29
IPI00012007	Adenosylhomocysteinase	1.01507	0.0215743	1.04806	0.0677184	0.990582	-0.0136512	P23526	15	38.4	1.6425e-107
IPI00141318	Isoform 1 of Cytoskeleton-associated protein 4	1.01467	0.0210133	1.00814	0.0116973	1.0814	0.112894	Q07065-1	27	54.2	0
IPI00005158	Lon protease homolog, mitochondrial	1.01465	0.0209803	1.13196	0.178822	0.904555	-0.14472	P36776	37	58.4	0
IPI00334190	Stomatin-like protein 2	1.01451	0.0207822	1.04402	0.062147	1.02691	0.0383063	Q9UJZ1	12	59.8	9.9792e-253
IPI00302850	Small nuclear ribonucleoprotein Sm D1	1.01444	0.0206832	0.662253	-0.594546	1.23506	0.304577	P62314	3	37	1.9519e-50
IPI00791086	Putative uncharacterized protein EIF3D	1.01413	0.0202374	1.17498	0.232642	0.925139	-0.112257	A8MWD3	16	50.9	1.0273e-115
IPI00013452	Bifunctional aminoacyl-tRNA synthetase	1.0141	0.0202044	1.02256	0.0321859	0.962137	-0.0556854	P07814	87	70.4	0
IPI00784366	Isoform 2 of AP-2 complex subunit beta	1.01408	0.0201714	1.04394	0.0620334	0.959639	-0.0594368	P63010-2	33	51.2	0
IPI00792788	216 kDa protein	1.01407	0.0201549	0.854457	-0.22692	0.990294	-0.0140711	Q9H7D0-1	3	3.4	0.0051221
IPI00021440	Actin, cytoplasmic 2	1.01369	0.0196098	1.0415	0.0586609	1.03152	0.0447722	P63261	25	76.5	0
IPI00026940	Nucleoporin 50 kDa	1.01366	0.0195768	0.833766	-0.262286	1.07361	0.102472	Q9UKX7	11	38	2.9018e-138
IPI00179016	Histone-lysine N-methyltransferase SETD1A	1.01355	0.0194115	1.28278	0.359275	0.818009	-0.289812	O15047	3	2.1	2.4493e-26
IPI00409671	Isoform 1 of ATP-dependent RNA helicase DDX42	1.01342	0.0192298	1.00055	0.000799887	1.10427	0.143089	Q86XP3-1	21	31.2	1.6843e-131
IPI00103483	Negative elongation factor B	1.0132	0.0189158	1.02231	0.0318381	0.851605	-0.231744	Q8WX92	9	24.8	2.1572e-81
IPI00013297	28 kDa heat- and acid-stable phosphoprotein	1.01304	0.0186844	0.977097	-0.0334258	0.989141	-0.0157521	Q13442	3	26.5	2.1163e-08
IPI00479722	Proteasome activator complex subunit 1	1.01301	0.0186513	1.20525	0.269329	0.955266	-0.0660253	Q06323	10	46.6	6.4401e-65
IPI00215948	Isoform 1 of Catenin alpha-1	1.0127	0.0182049	0.945068	-0.0815101	1.0148	0.0211942	P35221-1	32	52	0
IPI00848321	SWI/SNF-related matrix-associated actin-dependent regulator of chromatin d2 isoform 1	1.01264	0.0181222	0.907232	-0.140456	1.0246	0.0350625	A5PLL5	7	20.7	4.0604e-46
IPI00167941	Midasin	1.0125	0.0179238	1.16162	0.216137	0.834288	-0.261383	Q9NU22	17	5.3	9.2088e-189
IPI00748472	Putative uncharacterized protein KIAA0196 (Fragment)	1.01237	0.0177418	1.18628	0.246447	0.898011	-0.155195	Q53EL1	6	10.1	7.815e-58
IPI00440703	glutathione S-transferase kappa 1 isoform b	1.01225	0.0175599	1.16443	0.21962	1.02085	0.0297756	Q6P4H0	7	37.9	7.0556e-35
IPI00101186	Isoform 1 of RRP12-like protein	1.0122	0.0174937	1.06464	0.0903669	0.952595	-0.0700656	Q5JTH9-1	39	46.3	0
IPI00640817	Adenylate kinase 1	1.01216	0.017444	1.22047	0.287442	0.949135	-0.0753146	Q53EY8	2	12.4	0.0043878
IPI00438229	Isoform 1 of Transcription intermediary factor 1-beta	1.01197	0.0171628	0.79352	-0.333661	1.31078	0.390428	Q13263-1	42	74	0
IPI00216737	Isoform 1 of MYC-induced nuclear antigen	1.01142	0.0163848	0.719328	-0.475279	1.59408	0.672724	Q8IUF8-1	2	8	0.053658
IPI00478231	Transforming protein RhoA	1.01136	0.016302	0.656926	-0.606197	1.2512	0.323314	P61586	9	51.3	5.8612e-132
IPI00022348	Isoform PML-1 of Probable transcription factor PML	1.01126	0.016153	0.839818	-0.251851	1.22516	0.292968	P29590-1	9	16.6	4.4861e-61
IPI00479786	KH-type splicing regulatory protein	1.01115	0.0160039	0.817005	-0.291584	1.28935	0.366647	Q92945-1	29	55.6	0
IPI00429191	Eukaryotic peptide chain release factor subunit 1	1.01104	0.0158383	1.19169	0.25301	0.867865	-0.204458	P62495	16	49.2	4.8613e-235
IPI00006504	Isoform 1 of Translation initiation factor eIF-2B subunit gamma	1.01019	0.0146287	0.607916	-0.718055	1.19441	0.256295	Q9NR50-1	1	4.4	1.9023e-05
IPI00394788	Probable alanyl-tRNA synthetase, mitochondrial	1.0101	0.0144961	0.883323	-0.178987	1.04815	0.0678387	Q5JTZ9	5	9.8	2.1956e-31
IPI00024920	ATP synthase subunit delta, mitochondrial	1.00995	0.0142805	1.09399	0.129595	1.01884	0.0269208	P30049	5	41.1	8.6138e-24
IPI00301202	magnesium transporter 1	1.00994	0.0142639	1.07814	0.108548	0.770104	-0.376875	B4DH58	4	10.4	0.0031768
IPI00015911	Dihydrolipoyl dehydrogenase, mitochondrial	1.00977	0.0140318	1.13158	0.178333	1.05189	0.0729881	P09622	17	47.5	8.4992e-298
IPI00099996	Mitochondrial ribonuclease P protein 1	1.00973	0.0139654	1.26193	0.335627	0.968384	-0.0463494	Q7L0Y3	5	18.4	9.8779e-55
IPI00219111	Translocating chain-associated membrane protein 1	1.00965	0.0138493	1.4807	0.566275	0.808024	-0.30753	Q15629	3	8.6	2.9299e-65
IPI00456969	Cytoplasmic dynein 1 heavy chain 1	1.00953	0.0136835	1.09223	0.127281	0.942322	-0.0857084	Q14204	213	59	0
IPI00023510	Ras-related protein Rab-5A	1.00951	0.0136503	0.807474	-0.308512	1.12618	0.171434	P20339	7	39.5	3.4287e-51
IPI00748807	Isoform 1 of Nuclear pore complex protein Nup160	1.00946	0.0135839	1.05915	0.0829066	0.892293	-0.164411	Q12769-1	28	32.9	0
IPI00016077	Protein NipSnap homolog 2	1.00938	0.0134678	1.10115	0.139009	0.777648	-0.362812	O75323	2	10.1	0.0021313
IPI00016968	Succinate dehydrogenase cytochrome b560 subunit, mitochondrial	1.00919	0.0132023	1.02338	0.0333447	0.9367	-0.0943411	Q99643	2	14.2	0.0020825
IPI00030431	Isoform 1 of Anthrax toxin receptor 1	1.00887	0.0127376	0.817484	-0.290737	1.29329	0.371048	Q9H6X2-1	2	6	0.0012522
IPI00217490	Isoform 1 of Fibronectin type III domain-containing protein 3B	1.00866	0.0124388	0.879777	-0.184791	0.818643	-0.288693	Q53EP0-1	3	3.8	2.8838e-22
IPI00940237	ATP-dependent RNA helicase DDX39	1.00852	0.0122396	1.11429	0.15613	0.963867	-0.053094	O00148	16	44	1.4113e-138
IPI00019755	Glutathione S-transferase omega-1	1.00833	0.0119739	1.20486	0.26887	1.03402	0.0482625	P78417	5	21.2	3.6406e-07
IPI00025491	Eukaryotic initiation factor 4A-I	1.00823	0.0118244	1.2024	0.265916	0.865549	-0.208313	P60842	30	81.5	0
IPI00009950	Vesicular integral-membrane protein VIP36	1.00754	0.0108441	1.19358	0.255296	0.947819	-0.0773172	Q12907	9	43	1.6388e-61
IPI00140420	Staphylococcal nuclease domain-containing protein 1	1.00738	0.0106114	0.994748	-0.0075963	1.02268	0.0323537	Q7KZF4	42	65.2	0
IPI00064193	Isoform 1 of Protein disulfide-isomerase TMX3	1.00722	0.0103787	1.03123	0.0443639	1.03315	0.0470552	Q96JJ7-1	13	41.2	5.0526e-216
IPI00021983	Isoform 1 of Nicastrin	1.0072	0.0103454	0.912819	-0.131599	1.11887	0.162047	Q92542-1	7	14.1	6.3165e-34
IPI00005011	Isoform 1 of CCR4-NOT transcription complex subunit 2	1.00701	0.0100794	0.576955	-0.793469	1.97876	0.984598	Q9NZN8-1	1	4.3	0.011727
IPI00005719	Isoform 1 of Ras-related protein Rab-1A	1.00665	0.00956376	0.953489	-0.0687111	1.08303	0.115072	P62820-1	11	57.1	3.7507e-64
IPI00025086	Cytochrome c oxidase subunit 5A, mitochondrial	1.00658	0.00946394	0.680178	-0.556016	1.31962	0.400126	P20674	4	46.7	6.7296e-20
IPI00026689	Putative uncharacterized protein DKFZp686L20222	1.00643	0.00924765	0.587431	-0.76751	1.94234	0.957796	P06493-1	3	14.5	1.148e-05
IPI00479069	Isoform 1 of HEAT repeat-containing protein 5B	1.0063	0.00906461	0.96847	-0.0462202	0.846022	-0.241234	Q9P2D3-1	3	3.1	4.3818e-53
IPI00009542	Isoform 1 of Melanoma-associated antigen D2	1.00627	0.00901468	0.744196	-0.426246	1.33212	0.41372	Q9UNF1-1	4	10.9	0.075808
IPI00303158	Isoform 1 of N-acylneuraminate cytidylyltransferase	1.00626	0.00899804	0.885528	-0.17539	1.09197	0.126928	Q8NFW8-1	10	30.4	2.1795e-33
IPI00334282	Protein FAM3C	1.00604	0.00868181	0.94819	-0.0767519	0.87883	-0.186345	Q92520	5	30.4	1.9604e-65
IPI00187011	Zinc finger CCCH domain-containing protein 4	1.0052	0.00748282	0.678069	-0.560496	1.45176	0.537802	Q9UPT8	8	10.9	3.0796e-16
IPI00006025	Isoform 1 of Squamous cell carcinoma antigen recognized by T-cells 3	1.00505	0.00726623	1.09663	0.133076	0.984913	-0.0219325	Q15020-1	34	47.9	0
IPI00303300	FK506-binding protein 10	1.00455	0.00654959	0.917407	-0.124367	1.1109	0.151726	Q96AY3	19	41.8	9.7253e-186
IPI00180386	Isoform GN-1L of Glycogenin-1	1.00445	0.00639955	0.917215	-0.124668	0.986162	-0.0201037	P46976-1	2	8.6	2.4647e-18
IPI00030706	Activator of 90 kDa heat shock protein ATPase homolog 1	1.00432	0.00621615	1.24638	0.317748	0.794321	-0.332207	O95433	5	23.1	1.6014e-23
IPI00171844	COP9 signalosome complex subunit 4	1.00416	0.00598269	1.07906	0.109776	1.04651	0.0655883	Q9BT78	10	34.7	7.7052e-77
IPI00152441	Isoform 1 of Minor histocompatibility antigen H13	1.0041	0.0058993	0.964664	-0.0519023	1.06938	0.0967787	Q8TCT9-1	9	27.6	1.1083e-201
IPI00027078	Carboxypeptidase D	1.00402	0.00578255	0.537777	-0.894919	1.91832	0.939841	O75976	24	23.6	1.3284e-129
IPI00002134	26S proteasome non-ATPase regulatory subunit 5	1.00387	0.00556571	1.19098	0.252148	0.840006	-0.251529	Q16401	6	19.2	2.1258e-40
IPI00294618	Proline-rich protein PRCC	1.00352	0.00506517	0.681506	-0.553202	0.464809	-1.10529	Q92733	2	6.5	2.3299e-05
IPI00016801	Glutamate dehydrogenase 1, mitochondrial	1.00306	0.00441422	0.945177	-0.0813429	1.08005	0.111098	P00367	29	63.4	0
IPI00645078	Ubiquitin-like modifier-activating enzyme 1	1.00283	0.00408028	1.08081	0.112117	0.936306	-0.094948	P22314	49	64.7	0
IPI00008998	Protein tyrosine phosphatase-like protein PTPLAD1	1.00276	0.00398008	0.931361	-0.102588	1.09783	0.134652	Q9P035	8	30.9	6.5061e-76
IPI00217661	RAVER1	1.00263	0.00379637	0.820962	-0.284612	1.07621	0.105954	Q8IY67-2	17	48.4	6.586e-153
IPI00412298	Isoform 1 of Serine/threonine-protein kinase ATR	1.0026	0.00374626	0.854347	-0.227105	1.13233	0.179291	Q13535-1	10	7.2	1.3709e-63
IPI00019912	Peroxisomal multifunctional enzyme type 2	1.00244	0.00351241	0.890718	-0.16696	1.18278	0.242181	P51659	29	55.7	0
IPI00031822	Sodium-dependent multivitamin transporter	1.00241	0.003479	0.60248	-0.731015	1.55199	0.634119	Q9Y289	2	4.7	0.00010499
IPI00003217	Proteasome subunit beta type-7	1.00238	0.00342888	0.960638	-0.0579359	1.07265	0.10118	Q99436	8	61.7	6.9862e-58
IPI00642238	Isoform 1 of Heterochromatin protein 1-binding protein 3	1.00215	0.00309471	0.865453	-0.208473	1.14347	0.193425	Q5SSJ5-1	15	32.9	2.3404e-141
IPI00024467	UDP-glucose:glycoprotein glucosyltransferase 2	1.00214	0.003078	0.839613	-0.252204	1.02931	0.0416776	Q9NYU1	6	7	1.8146e-48
IPI00873326	Putative uncharacterized protein UFD1L	1.00207	0.00297773	0.644684	-0.633336	1.43456	0.520605	C9JS35	4	19	3.6018e-25
IPI00026964	Cytochrome b-c1 complex subunit Rieske, mitochondrial	1.00196	0.00282732	1.2198	0.286649	0.83866	-0.253841	P47985	4	24.5	2.6568e-82
IPI00549736	Isoform 1 of Activating signal cointegrator 1 complex subunit 2	1.00186	0.00267689	0.838257	-0.254535	0.800692	-0.320681	Q9H1I8-1	2	5.4	7.0603e-10
IPI00170935	Leucine-rich repeat-containing protein 47	1.00179	0.0025766	1.04383	0.061882	0.809177	-0.305472	Q8N1G4	11	30.7	2.7674e-68
IPI00954530	OCIA domain containing 1 isoform 4	1.00172	0.0024763	0.857689	-0.221474	1.18787	0.24838	Q9NX40-1	3	13.6	5.0894e-28
IPI00033153	Nuclear RNA export factor 1	1.00166	0.00239271	1.02716	0.0386629	0.918461	-0.12271	Q9UBU9	10	21	4.1336e-156
IPI00003944	Lipoamide acyltransferase component of branched-chain alpha-keto acid dehydrogenase complex, mitochondrial	1.00135	0.00194124	0.945136	-0.0814056	1.24726	0.318764	P11182	2	4.8	1.4927e-22
IPI00011937	Peroxiredoxin-4	1.00125	0.00180745	0.95983	-0.0591497	1.0172	0.0246057	Q13162	10	48.3	1.4496e-118
IPI00024364	Isoform 1 of Transportin-1	1.00104	0.00150636	1.03332	0.047292	0.942312	-0.0857231	Q92973-1	28	47.2	0
IPI00011416	Delta(3,5)-Delta(2,4)-dienoyl-CoA isomerase, mitochondrial	1.00057	0.000820327	0.716151	-0.481664	1.23092	0.299742	Q13011	14	61.9	3.7749e-301
IPI00333541	Isoform 1 of Filamin-A	1.0003	0.000435333	1.09488	0.130768	0.93941	-0.0901732	P21333-1	157	76.9	0
IPI00297191	Mediator of RNA polymerase II transcription subunit 14	1	0	0.795163	-0.330677	1.21142	0.276695	O60244	1	1.6	1.2213e-31
IPI00307162	Isoform 2 of Vinculin	0.999768	-0.000334961	1.1545	0.207267	0.844801	-0.243316	P18206-1	54	57.7	0
IPI00384265	Isoform F of Constitutive coactivator of PPAR-gamma-like protein 1	0.999733	-0.000385212	0.906972	-0.14087	0.999327	-0.000970811	Q9NZB2-6	9	12.7	6.0101e-36
IPI00018963	Isoform 1 of Alpha-parvin	0.999396	-0.000871061	1.39894	0.484338	0.611859	-0.70873	Q9NVD7-1	3	7.8	8.2791e-15
IPI00217405	Isoform 1 of E3 ubiquitin-protein ligase UBR1	0.999315	-0.00098836	0.853827	-0.227984	1.32683	0.407984	Q8IWV7-1	5	4.3	4.839e-18
IPI00297579	Chromobox protein homolog 3	0.999106	-0.00129003	0.704607	-0.505109	1.56208	0.643468	Q13185	4	30.1	3.6642e-69
IPI00299149	Small ubiquitin-related modifier 2	0.999037	-0.0013906	0.895168	-0.159769	1.12253	0.166748	P61956	2	23.2	1.3956e-13
IPI00008248	anaphase-promoting complex subunit 7 isoform a	0.998189	-0.00261476	1.12643	0.171753	0.801365	-0.319469	A5D8X2	4	10.5	2.022e-22
IPI00010244	Isoform 1 of 28S ribosomal protein S11, mitochondrial	0.998038	-0.00283287	1.66775	0.737904	0.678455	-0.559676	P82912-1	1	8.2	0.00014598
IPI00008964	Ras-related protein Rab-1B	0.997795	-0.00318528	0.925363	-0.111909	0.996829	-0.00458241	Q9H0U4	9	50.7	1.8617e-138
IPI00100151	Isoform 1 of 5-3 exoribonuclease 2	0.997771	-0.00321884	0.966553	-0.0490789	1.05718	0.0802191	Q9H0D6-1	23	40.3	4.5231e-193
IPI00011528	Cleavage stimulation factor 50 kDa subunit	0.997423	-0.00372244	1.23937	0.309609	0.706765	-0.500697	Q05048	6	19.7	2.4236e-104
IPI00017726	Isoform 1 of 3-hydroxyacyl-CoA dehydrogenase type-2	0.997423	-0.00372244	1.09281	0.128041	0.993465	-0.00945851	Q99714-1	14	77.8	6.9585e-285
IPI00216237	60S ribosomal protein L36	0.997168	-0.00409185	1.15595	0.209079	0.958322	-0.0614174	Q9Y3U8	5	36.2	7.6705e-39
IPI00019733	mRNA export factor	0.997121	-0.00415903	0.641671	-0.640094	1.31549	0.395601	P78406	4	18.8	4.2296e-07
IPI00029012	Eukaryotic translation initiation factor 3 subunit A	0.996912	-0.00446136	1.10931	0.149662	0.895214	-0.159695	Q14152	82	58.2	0
IPI00171438	Thioredoxin domain-containing protein 5	0.996901	-0.00447816	0.94337	-0.0841046	1.01365	0.0195539	Q8NBS9	16	43.3	3.5203e-127
IPI00400922	Protein RRP5 homolog	0.996703	-0.00476375	0.704635	-0.505053	1.41957	0.50545	Q14690	20	17.6	7.5258e-170
IPI00219034	NADH dehydrogenase [ubiquinone] 1 alpha subcomplex subunit 8	0.996448	-0.00513344	1.29494	0.372886	0.933125	-0.0998576	P51970	3	23.8	9.3215e-35
IPI00646361	Isoform 5 of Nuclear pore complex protein Nup214	0.996402	-0.00520066	1.19958	0.262527	0.828157	-0.272024	P35658-5	27	21.8	2.2285e-175
IPI00783781	Nuclear pore complex protein Nup205	0.996402	-0.00520066	1.00872	0.0125201	1.03623	0.051343	Q92621	59	45.8	0
IPI00465233	Eukaryotic translation initiation factor 3, subunit E interacting protein	0.995067	-0.00713471	1.09955	0.136908	0.886517	-0.173779	B0QY89	21	44.5	0
IPI00010896	Chloride intracellular channel protein 1	0.994904	-0.00737034	1.03571	0.0506148	0.960004	-0.0588879	O00299	12	67.6	8.7622e-87
IPI00554742	Isoform 2 of Apoptosis inhibitor 5	0.994312	-0.00822902	0.981219	-0.0273527	1.18355	0.243118	Q9BZZ5-2	17	43.5	1.5244e-196
IPI00011702	Uncharacterized protein KIAA0406	0.994277	-0.00827955	0.972551	-0.0401541	0.739621	-0.435141	O43156	5	7.5	4.6077e-48
IPI00465361	60S ribosomal protein L13	0.993871	-0.00886916	0.927554	-0.108497	1.02969	0.0422162	P26373	11	47.4	4.0925e-63
IPI00908949	cDNA FLJ53464, highly similar to Threonyl-tRNA synthetase, cytoplasmic	0.993767	-0.00902081	1.14015	0.189221	0.907861	-0.139457	B4DEG8	31	49.1	0
IPI00619930	Isoform 1 of tRNA pseudouridine synthase A	0.993755	-0.00903766	1.3163	0.396492	1.07092	0.0988516	Q9Y606-1	4	10.3	7.5973e-15
IPI00017763	Putative uncharacterized protein NAP1L4	0.993094	-0.00999851	1.00836	0.0120108	0.826879	-0.274252	A8CGI3	7	24.6	2.5408e-83
IPI00301841	Transmembrane protein 161A	0.992838	-0.0103695	1.04411	0.0622794	0.907525	-0.139991	Q9NX61	2	7.3	3.6503e-13
IPI00032064	Isoform 2 of A-kinase anchor protein 2	0.992827	-0.0103864	0.9007	-0.150881	1.08485	0.117502	Q9Y2D5-4	3	5.6	3.0295e-08
IPI00008433	40S ribosomal protein S5	0.992664	-0.0106226	1.06552	0.091554	1.03315	0.0470552	P46782	13	70.1	1.4349e-223
IPI00298547	Protein DJ-1	0.992397	-0.0110106	1.20693	0.271344	0.888084	-0.171232	Q99497	9	68.3	1.3536e-98
IPI00939163	Isoform Alpha of Heat shock protein 105 kDa	0.992107	-0.0114325	0.803311	-0.315969	1.1527	0.205018	Q92598-1	41	63.5	0
IPI00219219	Galectin-1	0.991805	-0.0118715	0.764722	-0.386992	1.33779	0.419847	P09382	7	65.9	7.1648e-206
IPI00297723	RNA-binding protein 6	0.991712	-0.0120066	1.23573	0.305363	1.02124	0.0303188	P78332	2	2.2	0.00022852
IPI00216230	Lamina-associated polypeptide 2, isoform alpha	0.990784	-0.0133581	0.875052	-0.192559	1.07371	0.102601	P42166	19	47.8	4.9774e-237
IPI00002745	Cathepsin Z	0.990702	-0.0134764	0.874121	-0.194095	1.25947	0.332812	Q9UBR2	3	12.5	1.3957e-15
IPI00604527	Threonyl-tRNA synthetase, mitochondrial	0.990226	-0.0141696	0.958173	-0.0616424	0.907198	-0.140511	Q9BW92	7	14.9	1.571e-16
IPI00305267	Isoform 1 of Golgin subfamily A member 3	0.990145	-0.014288	1.11364	0.155279	0.937113	-0.0937048	Q08378-1	23	21.6	4.874e-55
IPI00026969	Isoform 1 of SEC23-interacting protein	0.989959	-0.0145586	1.1864	0.246597	0.757361	-0.400947	Q9Y6Y8-1	17	23.6	2.084e-25
IPI00022275	Phosphatidylinositide phosphatase SAC1	0.989913	-0.0146263	1.02275	0.0324564	0.95936	-0.0598558	Q9NTJ5	19	41.6	2.5074e-116
IPI00006702	cDNA FLJ56414, highly similar to Homo sapiens proline-, glutamic acid-, leucine-rich protein 1 (PELP1), mRNA	0.988961	-0.0160141	1.50165	0.586545	0.777494	-0.363097	Q8IZL8-1	22	33.1	2.0953e-187
IPI00012772	60S ribosomal protein L8	0.988857	-0.0161665	0.986834	-0.0191213	0.916308	-0.126096	P62917	12	57.6	7.8883e-55
IPI00026546	Platelet-activating factor acetylhydrolase IB subunit beta	0.988717	-0.0163697	1.03226	0.0458	0.800529	-0.320975	P68402	4	31.4	1.9577e-45
IPI00012795	Eukaryotic translation initiation factor 3 subunit I	0.987615	-0.0179797	1.08928	0.123369	0.931751	-0.101984	Q13347	10	50.5	5.0173e-55
IPI00021275	Isoform 1 of Ephrin type-B receptor 2	0.987557	-0.0180645	0.971319	-0.0419835	0.635739	-0.653494	P29323-1	6	8	2.5803e-09
IPI00058192	Isoform 1 of GDP-fucose protein O-fucosyltransferase 1	0.987267	-0.0184885	1.06667	0.0931106	0.983952	-0.0233408	Q9H488-1	10	45.1	1.5087e-41
IPI00030371	Isoform Alpha of Tripartite motif-containing protein 4	0.987011	-0.0188617	1.05192	0.0730243	0.959552	-0.0595668	Q9C037-1	2	6.4	0.00016156
IPI00289499	Bifunctional purine biosynthesis protein PURH	0.986617	-0.0194386	1.39073	0.47584	0.733144	-0.447831	P31939	30	69.6	0
IPI00939159	Adenylyl cyclase-associated protein	0.986257	-0.0199649	1.33821	0.420308	0.902114	-0.148618	B4DNA3	20	59.8	0
IPI00014577	Ras-related protein Rab-18	0.986117	-0.0201687	0.943835	-0.0833927	0.887065	-0.172888	Q9NP72	3	13.6	0.00021827
IPI00000684	Isoform AGX2 of UDP-N-acetylhexosamine pyrophosphorylase	0.986036	-0.0202876	1.0505	0.0710698	1.03363	0.047726	Q16222-1	20	52.5	1.1294e-239
IPI00024279	HEAT repeat-containing protein 1	0.986025	-0.0203045	1.11386	0.155563	0.850826	-0.233063	Q9H583	19	13.8	2.9929e-240
IPI00883896	LIM domain and actin binding 1 isoform a	0.98592	-0.0204574	1.06622	0.0924993	0.913117	-0.131128	Q53GG0	10	18.7	2.2783e-22
IPI00306871	Isoform 1 of Histone acetyltransferase KAT2A	0.985839	-0.0205763	0.908259	-0.138824	1.12618	0.171434	Q92830-1	2	2.9	0.016418
IPI00103525	Isoform 1 of Paraspeckle component 1	0.9857	-0.0207802	0.573915	-0.801091	1.10792	0.147852	Q8WXF1-1	7	18.7	1.3965e-44
IPI00031554	ATP-dependent RNA helicase DDX50	0.985375	-0.0212559	0.822058	-0.282688	1.03229	0.045847	Q9BQ39	5	11.1	3.0797e-31
IPI00293026	Isoform 1 of Elongation factor Tu GTP-binding domain-containing protein 1	0.985351	-0.0212899	1.27912	0.355157	0.794196	-0.332434	Q7Z2Z2-1	5	8	6.9375e-30
IPI00247439	Isoform 2 of STE20-like serine/threonine-protein kinase	0.985316	-0.0213409	1.12999	0.176306	0.935941	-0.0955108	Q9H2G2-2	28	34.8	8.9935e-186
IPI00220566	Isoform 1 of Thioredoxin reductase 2, mitochondrial	0.985235	-0.0214599	1.08477	0.11739	0.866712	-0.206376	Q9NNW7-1	6	22.9	9.6042e-38
IPI00465248	Isoform alpha-enolase of Alpha-enolase	0.985131	-0.0216129	1.25212	0.324374	0.793091	-0.334443	P06733-1	26	73	0
IPI00017596	Microtubule-associated protein RP/EB family member 1	0.985073	-0.0216979	1.0723	0.100703	0.927571	-0.108471	Q15691	5	28.4	4.8773e-15
IPI00215637	ATP-dependent RNA helicase DDX3X	0.98505	-0.0217319	0.956228	-0.0645731	0.981069	-0.0275741	O00571	30	61.6	0
IPI00001458	Kinetochore-associated protein 1	0.98491	-0.0219359	1.19477	0.256735	0.869883	-0.201107	P50748	2	1.7	4.4706e-06
IPI00946150	cDNA FLJ52061, highly similar to Translocon-associated protein subunit gamma	0.984864	-0.0220039	1.40716	0.492787	0.791687	-0.336997	B4E2P2	1	7.1	7.8325e-15
IPI00023086	39S ribosomal protein L15, mitochondrial	0.984829	-0.0220549	1.02226	0.0317608	0.954766	-0.0667802	Q9P015	2	11.1	1.8208e-05
IPI00009328	Eukaryotic initiation factor 4A-III	0.984736	-0.0221909	1.07424	0.103317	1.03546	0.0502723	P38919	16	38.4	8.4717e-67
IPI00514399	Putative uncharacterized protein RPS27	0.984469	-0.0225821	0.592648	-0.754753	1.35518	0.438484	Q5T4L4	2	36.4	2.3917e-05
IPI00294739	Isoform 1 of SAM domain and HD domain-containing protein 1	0.984353	-0.0227522	1.08417	0.116588	0.973957	-0.0380695	Q9Y3Z3-1	4	8.3	2.664e-65
IPI00550917	Twinfilin-2	0.984353	-0.0227522	0.936523	-0.0946136	0.862204	-0.213898	Q6IBS0	9	37.2	4.2603e-60
IPI00219675	Isoform B of Ras-related C3 botulinum toxin substrate 1	0.984341	-0.0227693	0.878284	-0.187241	1.09254	0.12769	P63000-2	4	25.1	1.8158e-56
IPI00815713	Isoform 4 of Treacle protein	0.983738	-0.0236542	1.352	0.435098	0.862916	-0.212709	Q13428-4	15	13.1	5.1058e-102
IPI00021728	Eukaryotic translation initiation factor 2 subunit 2	0.983703	-0.0237052	1.19636	0.258652	0.849375	-0.235526	P20042	12	47.7	3.7822e-225
IPI00029046	Malectin	0.98368	-0.0237393	0.944383	-0.0825557	1.07746	0.107628	Q14165	5	24.3	1.4519e-34
IPI00409659	Ubiquilin-2	0.983297	-0.0243012	0.585582	-0.772057	1.85153	0.888716	Q9UHD9	6	14.9	1.2487e-91
IPI00016639	Protein kinase C iota type	0.983239	-0.0243863	0.904384	-0.144993	1.23256	0.301656	P41743	2	6.9	0.00043226
IPI00003918	60S ribosomal protein L4	0.982972	-0.0247781	0.974222	-0.037678	1.00682	0.00981006	P36578	21	47.3	5.2821e-287
IPI00004795	Methylosome subunit pICln	0.982867	-0.0249315	1.16856	0.224734	0.892024	-0.164846	P54105	3	26.6	2.0892e-14
IPI00307259	DnaJ homolog subfamily C member 13	0.982624	-0.0252893	1.03132	0.044498	0.948751	-0.075899	O75165	30	20.7	7.0303e-258
IPI00022215	Activity-dependent neuroprotector homeobox protein	0.982554	-0.0253916	0.881036	-0.182727	1.08966	0.123878	Q9H2P0	6	7.2	5.0042e-10
IPI00012535	DnaJ homolog subfamily A member 1	0.982415	-0.0255961	0.792069	-0.336303	1.35095	0.433976	P31689	10	40.3	2.6677e-160
IPI00020124	Phosphatidylinositol 4-kinase type 2-alpha	0.982403	-0.0256131	1.10031	0.137914	1.11532	0.157455	Q9BTU6	4	13.6	1.1921e-19
IPI00298111	sorting nexin 6 isoform b	0.982368	-0.0256643	1.38908	0.474135	0.717163	-0.479627	Q9UNH7	2	5	0.02052
IPI00942869	Isoform 1ABC of Catenin delta-1	0.98195	-0.0262781	0.891361	-0.165918	0.969633	-0.0444894	O60716-1	23	37.2	0
IPI00296432	Isoform 1 of Protein IWS1 homolog	0.981904	-0.0263463	0.857894	-0.221129	1.09101	0.125658	Q96ST2-1	7	10.7	7.9323e-88
IPI00103554	Transcriptional repressor p66-beta	0.981788	-0.0265169	0.849336	-0.235594	1.16933	0.225676	Q8WXI9	3	6.7	1.0727e-05
IPI00217354	Isoform 2 of ADP-ribosylation factor GTPase-activating protein 1	0.981695	-0.0266533	0.971305	-0.0420038	0.822285	-0.282289	Q8N6T3-2	3	10.4	2.6728e-07
IPI00852741	Isoform 8 of Protein transport protein Sec31A	0.981358	-0.0271481	1.23129	0.300174	0.812618	-0.299351	O94979-8	15	21.2	8.626e-209
IPI00024661	Protein transport protein Sec24C	0.981115	-0.0275065	1.15483	0.207677	0.94162	-0.0867828	P53992	14	16.3	3.2984e-89
IPI00007061	Vesicle transport protein GOT1B	0.980697	-0.0281211	0.956023	-0.064883	0.950769	-0.0728336	Q9Y3E0	2	18.1	5.6103e-43
IPI00299571	Isoform 2 of Protein disulfide-isomerase A6	0.980488	-0.0284285	0.906424	-0.141741	1.11224	0.153472	Q15084-2	16	37.8	0
IPI00008557	Insulin-like growth factor 2 mRNA-binding protein 1	0.979873	-0.029334	0.937454	-0.0931799	1.00759	0.0109112	Q9NZI8	12	25.8	9.468e-86
IPI00916847	47 kDa protein	0.979745	-0.029522	1.00576	0.00828348	0.968576	-0.0460631	Q9NTK5-1	12	37.3	1.3708e-195
IPI00215719	60S ribosomal protein L18	0.979629	-0.0296929	0.970374	-0.0433875	0.982894	-0.0248915	Q07020	6	36.7	8.7825e-97
IPI00935926	similar to melanoma antigen family C, 2	0.979269	-0.0302229	0.650709	-0.619916	1.37305	0.457388	Q9UBF1	10	27.6	3.8425e-200
IPI00789848	isovaleryl Coenzyme A dehydrogenase isoform 1	0.979048	-0.0305479	1.08965	0.123859	0.971074	-0.0423463	C9JUI0	4	19	3.1234e-06
IPI00020984	cDNA FLJ55574, highly similar to Calnexin	0.978549	-0.0312836	0.813718	-0.297399	1.23438	0.303791	B4DGP8	39	56.8	0
IPI00789041	Isoform 1 of Pinin	0.978398	-0.0315061	1.09084	0.125435	0.923861	-0.114252	Q9H307-1	10	15.1	3.022e-27
IPI00016342	Ras-related protein Rab-7a	0.978189	-0.0318142	0.90018	-0.151714	1.20008	0.263127	P51149	12	62.3	7.0731e-272
IPI00101664	Probable asparaginyl-tRNA synthetase, mitochondrial	0.978039	-0.0320367	0.950696	-0.072944	0.998751	-0.00180346	Q96I59	2	8.6	2.2023e-15
IPI00015953	Isoform 1 of Nucleolar RNA helicase 2	0.97776	-0.0324477	0.800408	-0.321192	1.24601	0.317318	Q9NR30-1	36	54.9	0
IPI00337495	Isoform 2 of Procollagen-lysine,2-oxoglutarate 5-dioxygenase 2	0.977679	-0.0325676	0.738759	-0.436824	1.49337	0.578571	O00469-2	13	23.5	3.2556e-88
IPI00028109	Protein dpy-30 homolog	0.976936	-0.0336643	0.980014	-0.0291256	1.07861	0.109171	Q9C005	2	36.4	2.4698e-28
IPI00005737	Isoform 1 of Surfeit locus protein 4	0.976878	-0.03375	1.41798	0.503836	0.745993	-0.422767	O15260-1	5	24.5	2.0904e-171
IPI00414320	cDNA FLJ55482, highly similar to Annexin A11	0.976855	-0.0337843	0.884994	-0.176261	0.982414	-0.025597	P50995	3	6	6.2756e-12
IPI00423568	Isoform 2A of GTPase KRas	0.97675	-0.0339386	1.13963	0.188562	0.940515	-0.088477	P01116-1	3	32.8	3.0887e-45
IPI00784614	septin 9 isoform a	0.97675	-0.0339386	0.974838	-0.0367658	1.00519	0.00746724	Q96QF2	11	21.8	1.9173e-114
IPI00419856	transportin 2 (importin 3, karyopherin beta 2b) isoform 3	0.976646	-0.0340929	1.16707	0.22289	0.71822	-0.477502	B4DRY5	11	16.6	3.0075e-84
IPI00550689	UPF0027 protein C22orf28	0.97646	-0.0343672	1.00936	0.0134403	0.969537	-0.0446324	Q9Y3I0	18	48.7	7.5752e-199
IPI00477040	Isoform 1 of Nucleoporin NUP188 homolog	0.976274	-0.0346417	0.896209	-0.158093	1.01384	0.0198274	Q5SRE5-1	11	8.7	1.4322e-24
IPI00640598	zinc finger, MYND-type containing 8 isoform a	0.975984	-0.0350706	0.966923	-0.0485271	1.06477	0.0905423	Q9ULU4-9	7	8.2	5.0713e-61
IPI00006167	Protein phosphatase 1G	0.975961	-0.0351049	0.939453	-0.0901064	1.06698	0.0935339	O15355	16	42.1	1.9522e-105
IPI00790503	Isoform 3 of Myosin-10	0.975938	-0.0351392	1.2502	0.322163	0.813031	-0.298618	P35580-3	82	49	0
IPI00296635	1,4-alpha-glucan-branching enzyme	0.975891	-0.0352078	0.8756	-0.191656	1.15606	0.209221	Q04446	5	17.2	3.3296e-14
IPI00305064	Isoform CD44 of CD44 antigen	0.975682	-0.0355167	0.938454	-0.0916423	1.09648	0.132883	P16070-1	10	13.2	7.5001e-168
IPI00026994	PRA1 family protein 2	0.975497	-0.0357914	1.94792	0.961937	0.489564	-1.03043	O60831	2	16.3	3.0164e-23
IPI00554436	Isoform 3 of Putative splicing factor, arginine/serine-rich 14	0.975473	-0.0358257	0.775677	-0.366471	1.00192	0.00277015	Q8IX01-3	6	8.2	2.612e-25
IPI00646500	Isoform 3 of Replication protein A 32 kDa subunit	0.975427	-0.0358944	0.943151	-0.0844397	1.55324	0.635279	P15927-3	3	23.7	5.9085e-21
IPI00551024	Bifunctional ATP-dependent dihydroxyacetone kinase/FAD-AMP lyase (cyclizing)	0.975357	-0.0359974	1.58121	0.661026	0.613252	-0.705448	Q3LXA3	7	17.7	4.6847e-58
IPI00014213	Probable leucyl-tRNA synthetase, mitochondrial	0.975009	-0.0365126	0.799956	-0.322007	0.867788	-0.204586	Q15031	11	17.8	5.2915e-48
IPI00029015	3-ketodihydrosphingosine reductase	0.974719	-0.036942	0.834081	-0.261741	1.19479	0.256759	Q06136	3	13.6	2.7209e-08
IPI00004068	Mediator of RNA polymerase II transcription subunit 12	0.974498	-0.0372685	0.765749	-0.385056	1.03431	0.0486646	Q93074-3	6	4.7	8.5055e-10
IPI00894287	cDNA FLJ56889, moderately similar to Vigilin	0.974429	-0.0373716	0.885117	-0.17606	1.07563	0.105181	B4DTQ2	31	36.3	1.1348e-256
IPI00238209	NudC domain-containing protein 3	0.974324	-0.0375263	1.13826	0.186828	0.737238	-0.439797	Q8IVD9	4	20.5	4.2077e-18
IPI00008438	40S ribosomal protein S10	0.974243	-0.0376466	1.15837	0.212101	1.01384	0.0198274	P46783	10	60	2.2003e-136
IPI00940950	Ribosomal protein L10 (Fragment)	0.974231	-0.0376638	1.16589	0.221434	0.901528	-0.149556	Q5HY50	9	39.6	9.8458e-70
IPI00456758	60S ribosomal protein L27a	0.973407	-0.0388847	1.13127	0.177949	0.999327	-0.000970811	P46776	3	22.3	8.6492e-46
IPI00334159	Von Hippel-Lindau binding protein 1	0.973361	-0.0389535	1.26503	0.339176	0.912541	-0.132039	P61758	6	29.2	4.4822e-31
IPI00394926	DNA polymerase delta subunit 3	0.97314	-0.0392804	0.540598	-0.887371	1.59716	0.675505	Q15054	3	9.7	1.8519e-06
IPI00168262	Procollagen galactosyltransferase 1	0.973059	-0.0394009	0.741238	-0.431992	1.2316	0.30053	Q8NBJ5	16	32.3	3.4686e-87
IPI00069693	Putative uncharacterized protein RPL14P1	0.972885	-0.0396591	0.896784	-0.157167	1.00605	0.00870803	A6NIH1	5	27	1.1277e-59
IPI00289807	Isoform 1 of tRNA-nucleotidyltransferase 1, mitochondrial	0.97278	-0.039814	0.691543	-0.532108	1.55036	0.632599	Q96Q11-1	3	9.9	1.11e-12
IPI00221093	40S ribosomal protein S17	0.972757	-0.0398484	0.930073	-0.104584	1.02556	0.036415	P08708	7	62.2	9.1119e-76
IPI00550021	60S ribosomal protein L3	0.972699	-0.0399345	1.06759	0.094351	0.925841	-0.111164	P39023	20	53.1	3.1143e-195
IPI00871827	Putative uncharacterized protein RPL7 (Fragment)	0.972629	-0.0400378	1.09133	0.126087	0.830175	-0.268513	A8MVV7	16	48.2	3.2778e-72
IPI00018398	26S protease regulatory subunit 6A	0.972629	-0.0400378	0.934551	-0.0976545	0.997694	-0.00333122	P17980	17	55.8	5.0821e-242
IPI00174025	Isoform 1 of Dynamin-binding protein	0.972548	-0.0401583	0.798765	-0.324157	0.607361	-0.719373	Q6XZF7-1	3	2.4	0.00032516
IPI00796337	poly(rC) binding protein 2 isoform a	0.972386	-0.0403994	0.912354	-0.132335	1.09206	0.127055	Q59HD4	10	52.2	5.5753e-106
IPI00017450	General transcription factor IIF subunit 1	0.97227	-0.0405717	0.952572	-0.0700999	1.16894	0.225202	P35269	4	10.8	6.3202e-27
IPI00015018	Inorganic pyrophosphatase	0.972246	-0.0406061	1.30512	0.384177	0.876725	-0.189804	Q15181	6	23.9	9.4138e-81
IPI00465132	Coatomer subunit epsilon	0.971945	-0.041054	1.0399	0.0564399	0.893187	-0.162966	O14579	5	36.4	2.005e-31
IPI00013678	Isoform 1 of Metaxin-1	0.971945	-0.041054	0.486878	-1.03837	2.05641	1.04013	Q13505-1	2	7.1	2.1753e-07
IPI00645303	Isoform 1 of Sorting nexin-27	0.97191	-0.0411057	0.954037	-0.0678825	0.943446	-0.083988	Q96L92-1	5	13.7	1.3572e-11
IPI00419894	Isoform 3 of Homeobox protein cut-like 1	0.970923	-0.042571	0.757917	-0.399889	0.879963	-0.184484	P39880-3	2	2.5	6.4931e-11
IPI00103090	Isoform 1 of RNA polymerase-associated protein LEO1	0.97061	-0.0430368	0.701663	-0.51115	1.50384	0.588655	Q8WVC0-1	5	12	2.9079e-36
IPI00005948	Isoform 1 of Methylthioribose-1-phosphate isomerase	0.970389	-0.0433646	1.08192	0.113597	0.769085	-0.378785	Q9BV20-1	5	28.2	6.0596e-14
IPI00012728	Isoform 1 of Long-chain-fatty-acid--CoA ligase 1	0.97025	-0.0435717	1.20553	0.269674	0.908361	-0.138663	P33121-1	5	9.9	5.1608e-10
IPI00299387	Transmembrane protein C3orf1	0.970029	-0.0438997	1.03017	0.042888	0.694695	-0.525548	Q9NPL8	2	16.5	1.4761e-64
IPI00034049	Isoform 1 of Regulator of nonsense transcripts 1	0.969844	-0.0441759	0.980411	-0.0285411	0.956612	-0.0639949	Q92900-1	35	38.3	1.2644e-243
IPI00104128	Signal peptidase complex catalytic subunit SEC11A	0.969461	-0.0447458	1.14667	0.197445	0.835037	-0.260087	P67812	5	30.7	3.9969e-32
IPI00013683	Tubulin beta-3 chain	0.969333	-0.0449359	1.12459	0.169401	0.918806	-0.122167	Q13509	21	62.4	0
IPI00942520	cDNA FLJ55610, highly similar to Protein arginine N-methyltransferase 1	0.968718	-0.0458518	0.785646	-0.348048	1.27561	0.351188	B4E3C3	17	56.9	3.2999e-144
IPI00023728	Gamma-glutamyl hydrolase	0.968416	-0.0463013	0.697966	-0.518772	1.40352	0.489047	Q92820	5	24.2	6.2256e-26
IPI00328361	Seryl-tRNA synthetase, mitochondrial	0.968358	-0.0463878	0.675905	-0.565107	1.30088	0.379492	Q9NP81	5	15.8	4.6528e-65
IPI00031397	Long-chain-fatty-acid--CoA ligase 3	0.968335	-0.0464223	0.81706	-0.291487	1.09168	0.126547	O95573	23	46.7	0
IPI00099311	Isoform 1 of tRNA (adenine-N(1)-)-methyltransferase non-catalytic subunit TRM6	0.9683	-0.0464742	0.92094	-0.118821	0.879493	-0.185257	Q9UJA5-1	12	31.6	4.4759e-66
IPI00329692	Isoform Long of Glycylpeptide N-tetradecanoyltransferase 1	0.96823	-0.046578	0.897195	-0.156507	0.982126	-0.0260204	P30419-1	7	24	7.9792e-119
IPI00410079	Isoform 1 of Regulator of microtubule dynamics protein 3	0.968207	-0.0466126	0.847528	-0.238667	0.917586	-0.124085	Q96TC7-1	8	23	5.9328e-108
IPI00069750	Isoform 1 of Poly(U)-binding-splicing factor PUF60	0.967894	-0.0470797	1.04258	0.0601587	0.949298	-0.0750663	Q9UHX1-1	15	40.8	3.6739e-97
IPI00024911	Endoplasmic reticulum protein ERp29	0.967743	-0.0473046	1.00247	0.00356152	0.912579	-0.131978	P30040	10	55.6	7.8042e-73
IPI00185146	Importin-9	0.967673	-0.0474084	1.16193	0.216529	0.807957	-0.30765	Q96P70	26	38.9	6.6018e-288
IPI00303832	Paf1/RNA polymerase II complex component	0.96722	-0.0480835	1.28129	0.357595	0.896281	-0.157977	Q92541	4	6.2	0.00011294
IPI00783872	Isoform 1 of Caprin-1	0.967197	-0.0481181	0.662184	-0.594695	1.40736	0.492993	Q14444-1	7	14	8.3872e-66
IPI00646556	28 kDa protein	0.967116	-0.0482393	1.01485	0.0212676	1.05718	0.0802191	P19404	2	9.1	1.4311e-05
IPI00394758	Isoform 2 of Fatty aldehyde dehydrogenase	0.967081	-0.0482913	0.898646	-0.154175	1.1945	0.256411	P51648-2	7	19.1	1.7341e-90
IPI00646240	Histone H2B	0.966652	-0.0489321	0.924254	-0.113639	1.12166	0.165636	B4DR52	5	27.1	9.018e-67
IPI00022316	28S ribosomal protein S18b, mitochondrial	0.966652	-0.0489321	0.653146	-0.614522	1.04968	0.0699535	Q9Y676	4	31	5.9334e-15
IPI00549761	Chitobiosyldiphosphodolichol beta-mannosyltransferase	0.966141	-0.0496946	0.934414	-0.0978659	0.727907	-0.458174	Q9BT22	2	5.6	3.5159e-10
IPI00219622	Proteasome subunit alpha type-2	0.965932	-0.0500066	1.17789	0.236202	0.835201	-0.259805	P25787	8	52.6	1.141e-81
IPI00793201	small inducible cytokine subfamily E, member 1 isoform b precursor	0.965909	-0.0500413	0.959994	-0.0589027	0.828416	-0.271572	B4E1S7	6	34.8	2.0223e-30
IPI00296157	Isoform 1 of All-trans-retinol 13,14-reductase	0.965827	-0.0501626	0.660664	-0.598011	1.42745	0.513436	Q6NUM9-1	6	17.7	1.1716e-17
IPI00302605	Zinc transporter 7	0.965781	-0.050232	0.923829	-0.114302	0.877475	-0.188571	Q8NEW0	4	10.6	4.85e-06
IPI00008527	60S acidic ribosomal protein P1	0.965642	-0.0504401	1.00546	0.00785127	0.88817	-0.171092	P05386	5	94.7	3.9179e-88
IPI00002441	Syndecan-1	0.965526	-0.0506135	0.840544	-0.250604	1.42274	0.508669	P18827	1	6.1	1.2768e-21
IPI00028635	Dolichyl-diphosphooligosaccharide--protein glycosyltransferase subunit 2	0.965468	-0.0507002	0.935688	-0.095901	0.983087	-0.0246095	P04844	25	64.3	0
IPI00098769	Isoform 1 of Carbohydrate sulfotransferase 2	0.965085	-0.0512727	0.915175	-0.127881	0.933154	-0.099813	Q9Y4C5-1	2	3	0.21492
IPI00005969	F-actin-capping protein subunit alpha-1	0.964887	-0.0515678	1.0832	0.115294	0.804651	-0.313565	P52907	9	54.5	8.3881e-115
IPI00004669	Polypeptide N-acetylgalactosaminyltransferase 2	0.964725	-0.0518107	0.855594	-0.225003	1.12608	0.171311	Q10471	12	28.9	1.7346e-121
IPI00908873	Isoform 3 of Nucleolar phosphoprotein p130	0.96469	-0.0518628	0.594702	-0.749761	1.50913	0.593716	Q14978-3	5	10.6	3.0658e-44
IPI00028520	Isoform 1 of NADH dehydrogenase [ubiquinone] flavoprotein 1, mitochondrial	0.964655	-0.0519149	1.08422	0.116661	0.915895	-0.126746	P49821-1	15	47	1.3699e-150
IPI00026665	cDNA FLJ75085, highly similar to Homo sapiens glutaminyl-tRNA synthetase (QARS), mRNA	0.964632	-0.0519496	1.09952	0.136872	0.867519	-0.205033	A8K3A8	35	57.6	0
IPI00152695	WD repeat-containing protein 82	0.964295	-0.0524532	0.851677	-0.231621	1.17269	0.22982	Q6UXN9	2	10.9	3.8957e-47
IPI00029264	Cytochrome c1, heme protein, mitochondrial	0.964249	-0.0525226	0.871725	-0.198056	0.93669	-0.0943559	P08574	8	37.2	1.0785e-59
IPI00300096	Ras-related protein Rab-35	0.964133	-0.0526963	1.09924	0.136513	1.04276	0.0604124	Q15286	5	26.9	2.0567e-41
IPI00024502	Ubiquilin-4	0.963866	-0.0530958	0.684026	-0.547878	0.853661	-0.228264	Q9NRR5	10	31.4	6.8475e-67
IPI00023526	Isoform 1 of Ras-related protein Rab-6A	0.963785	-0.0532175	0.83582	-0.258736	1.22045	0.287413	P20340-1	5	28.8	7.8975e-16
IPI00027443	cysteinyl-tRNA synthetase isoform c	0.963378	-0.0538257	1.16151	0.216001	0.765741	-0.385072	B4DPV7	13	21.5	9.1724e-292
IPI00012912	Carnitine O-palmitoyltransferase 2, mitochondrial	0.963204	-0.0540865	0.943014	-0.0846492	0.941563	-0.0868711	P23786	9	21.7	5.9755e-89
IPI00025049	Cation-dependent mannose-6-phosphate receptor	0.962972	-0.0544343	1.17362	0.230959	0.703296	-0.507796	P20645	6	25.3	1.8646e-126
IPI00604590	Nucleoside diphosphate kinase	0.962705	-0.0548343	1.08084	0.112154	0.904372	-0.145011	Q32Q12	12	64	5.0986e-128
IPI00480142	Isoform 2 of Cullin-4B	0.962055	-0.0558087	0.946656	-0.0790873	1.0666	0.0930141	Q13620-2	12	17	1.4686e-206
IPI00018321	Isoform 1 of Histone-lysine N-methyltransferase SETDB1	0.96173	-0.0562962	0.622076	-0.684838	1.82443	0.867444	Q15047-1	2	3.3	0.0038074
IPI00013744	Integrin alpha-2	0.961649	-0.0564181	0.989709	-0.0149234	1.02258	0.0322181	P17301	23	31	3.185e-235
IPI00645962	Isoform 3 of Tapasin	0.96137	-0.0568361	0.702471	-0.509489	1.25716	0.330168	O15533-3	4	12.7	2.9813e-12
IPI00243221	nardilysin isoform a	0.961324	-0.0569058	0.985574	-0.0209643	0.935422	-0.0963109	B1AKJ5	16	16.1	5.1664e-297
IPI00002372	Isoform 1 of ATP-binding cassette sub-family D member 3	0.961266	-0.0569929	0.811952	-0.300534	1.00913	0.0131111	P28288-1	8	17.6	3.1082e-150
IPI00026202	60S ribosomal protein L18a	0.961184	-0.0571148	1.04031	0.0570097	1.00702	0.0100854	Q02543	11	56.2	5.2597e-52
IPI00219774	cAMP-dependent protein kinase type II-alpha regulatory subunit	0.961068	-0.057289	1.16743	0.223331	0.91404	-0.129671	P13861	12	41.6	0
IPI00792916	protein kinase C substrate 80K-H isoform 2	0.961057	-0.0573065	1.00028	0.000404937	0.982606	-0.0253148	A8K318	29	62.7	0
IPI00215884	Isoform ASF-1 of Splicing factor, arginine/serine-rich 1	0.960987	-0.057411	1.16233	0.217022	0.814453	-0.296096	Q07955-1	4	18.5	2.9219e-16
IPI00299417	THO complex subunit 5 homolog	0.960929	-0.0574982	0.848254	-0.237432	0.798568	-0.324513	Q13769	2	6.1	1.3272e-17
IPI00002408	Isoform 1 of RNA polymerase II-associated protein 3	0.959699	-0.0593466	0.845132	-0.242752	0.995964	-0.00583469	Q9H6T3-1	3	6.2	1.1989e-29
IPI00219953	UMP-CMP kinase 1 isoform a	0.959571	-0.0595386	1.10778	0.147666	0.820613	-0.285226	P30085	6	31.6	1.4655e-51
IPI00946054	euchromatic histone-lysine N-methyltransferase 1 isoform 1	0.959478	-0.0596782	0.617639	-0.695165	0.928926	-0.106365	Q9H9B1-3	3	4.4	0.47304
IPI00413778	FKBP1A protein	0.959408	-0.0597829	1.0782	0.108622	0.872631	-0.196556	Q0VDC6	2	18.6	3.9533e-11
IPI00024175	Isoform 1 of Proteasome subunit alpha type-7	0.959339	-0.0598876	0.909122	-0.137454	1.07928	0.110071	O14818-1	10	52.4	7.2549e-204
IPI00016608	Transmembrane emp24 domain-containing protein 2	0.95906	-0.0603066	1.43605	0.52211	0.753075	-0.409134	Q15363	5	24.9	1.164e-97
IPI00024317	Isoform Long of Glutaryl-CoA dehydrogenase, mitochondrial	0.959037	-0.0603416	0.777334	-0.363393	1.2538	0.326303	Q92947-1	6	25.3	4.4768e-104
IPI00174962	MICAL-like protein 1	0.958956	-0.0604638	0.768584	-0.379725	0.886143	-0.174389	Q8N3F8	4	7.1	1.3709e-41
IPI00029731	60S ribosomal protein L35a	0.958735	-0.0607956	0.689065	-0.537288	1.04872	0.0686321	P18077	3	25.5	5.0199e-13
IPI00449049	Poly [ADP-ribose] polymerase 1	0.958422	-0.0612673	0.870725	-0.199711	1.10917	0.149478	P09874	51	57.2	0
IPI00219299	Talin-2	0.958178	-0.0616343	0.997022	-0.00430329	0.970786	-0.0427747	Q9Y4G6	15	7.1	9.0704e-157
IPI00307155	Rho-associated protein kinase 2	0.957934	-0.0620013	1.06407	0.0895873	0.888853	-0.169984	O75116	34	32.5	0
IPI00783698	Isoform 1 of Transmembrane protein 87A	0.957783	-0.0622286	1.24742	0.318952	0.978666	-0.0311113	Q8NBN3-1	2	4.9	4.0758e-28
IPI00639942	ribosomal protein S29 isoform 2	0.957667	-0.0624035	1.15166	0.20372	0.46011	-1.11995	A8MZ73	1	16.4	0.0080432
IPI00008569	Synaptobrevin homolog YKT6	0.957354	-0.0628757	1.12243	0.166623	0.975399	-0.0359359	O15498	2	11.1	0.0026992
IPI00647389	epsin 1 isoform a	0.957226	-0.0630681	0.837477	-0.255879	1.08293	0.114944	Q9Y6I3-2	4	6.5	0.0058758
IPI00023161	39S ribosomal protein L46, mitochondrial	0.957215	-0.0630856	1.09924	0.136513	1.00846	0.0121491	Q9H2W6	3	15.8	6.9247e-64
IPI00333197	Isoform 2 of GRIP and coiled-coil domain-containing protein 2	0.957145	-0.0631906	1.08897	0.12297	0.985585	-0.0209474	Q8IWJ2-2	4	3.3	3.415e-40
IPI00025874	Dolichyl-diphosphooligosaccharide--protein glycosyltransferase subunit 1 precursor	0.95711	-0.0632431	1.00722	0.0103837	0.984624	-0.0223548	P04843	29	55.6	0
IPI00014232	ADP-ribosylation factor-like protein 6-interacting protein 1	0.957052	-0.0633306	1.06633	0.0926475	0.984144	-0.023059	Q15041	3	19.7	6.6648e-38
IPI00219155	60S ribosomal protein L27	0.956704	-0.0638556	1.03331	0.0472729	0.970209	-0.0436318	P61353	4	36	1.7609e-31
IPI00171903	Isoform 1 of Heterogeneous nuclear ribonucleoprotein M	0.956657	-0.0639256	0.99913	-0.00125504	0.959302	-0.0599425	P52272-1	46	72.9	0
IPI00098902	2-oxoglutarate dehydrogenase E1 component, mitochondrial	0.956565	-0.0640656	0.830288	-0.268317	1.06381	0.0892396	Q02218	31	43.6	1.0359e-242
IPI00655650	40S ribosomal protein S26	0.956483	-0.0641882	1.07153	0.0996707	1.07774	0.108014	P62854	3	27	3.0979e-16
IPI00013070	Isoform 1 of Heterogeneous nuclear ribonucleoprotein U-like protein 1	0.956228	-0.0645734	0.896195	-0.158115	1.00029	0.000415862	Q9BUJ2-1	20	33.6	2.0668e-201
IPI00033022	Isoform 1 of Dynamin-2	0.956019	-0.0648887	1.21296	0.278528	0.786671	-0.346167	P50570-1	28	45.1	1.9592e-166
IPI00029444	UPF0160 protein MYG1, mitochondrial	0.955949	-0.0649938	1.06224	0.0871159	0.906631	-0.141413	Q9HB07	4	11.2	9.2935e-05
IPI00028122	Isoform 1 of PC4 and SFRS1-interacting protein	0.955706	-0.0653617	0.804571	-0.313708	1.13781	0.186253	O75475-1	4	11.3	1.0663e-31
IPI00008380	Serine/threonine-protein phosphatase 2A catalytic subunit alpha isoform	0.955462	-0.0657297	0.910628	-0.135066	0.858284	-0.220474	P67775	7	35	1.6104e-97
IPI00181702	Isoform 1 of Splicing factor, arginine/serine-rich 15	0.955439	-0.0657648	0.894305	-0.16116	1.08678	0.120056	O95104-1	4	4.4	0.0025884
IPI00396015	Isoform 4 of Acetyl-CoA carboxylase 1	0.955079	-0.0663082	1.0323	0.0458574	0.917048	-0.124931	Q13085-4	11	7.7	3.1621e-99
IPI00031461	cDNA FLJ60299, highly similar to Rab GDP dissociation inhibitor beta	0.955067	-0.0663257	1.22393	0.291516	0.800903	-0.3203	B4DLV7	24	65	0
IPI00028338	Ethanolaminephosphotransferase 1	0.954951	-0.0665011	0.969415	-0.0448134	1.10494	0.143967	Q9C0D9	2	9.8	2.8868e-06
IPI00017184	EH domain-containing protein 1	0.954893	-0.0665888	1.02063	0.0294592	0.891601	-0.16553	Q9H4M9	25	64.2	7.2422e-227
IPI00163230	COP9 signalosome complex subunit 6	0.954812	-0.0667115	1.02711	0.0385859	0.989141	-0.0157521	Q7L5N1	4	17.1	0.013109
IPI00554589	ferrochelatase isoform a precursor	0.954719	-0.0668519	0.969004	-0.0454249	1.13492	0.182593	Q8NAN0	3	12.6	1.1268e-07
IPI00446765	Isoform 1 of Integrator complex subunit 4	0.954568	-0.0670799	1.01589	0.0227463	0.869383	-0.201936	Q96HW7-1	2	4.9	3.6625e-16
IPI00009755	Isoform 1 of N6-adenosine-methyltransferase 70 kDa subunit	0.954452	-0.0672553	0.668209	-0.581628	0.940044	-0.0891995	Q86U44-1	3	8.3	1.0184e-06
IPI00003881	Heterogeneous nuclear ribonucleoprotein F	0.953999	-0.0679398	0.829644	-0.269436	1.15924	0.213173	P52597	16	66.7	3.1934e-226
IPI00000335	Histidine triad nucleotide-binding protein 2, mitochondrial	0.953976	-0.0679749	1.04206	0.0594385	1.10292	0.14133	Q9BX68	2	22.1	3.7162e-06
IPI00013439	Transcription factor jun-B	0.953767	-0.0682909	1.12954	0.175729	0.882991	-0.17953	P17275	2	8.4	2.0105e-07
IPI00550069	Ribonuclease inhibitor	0.953709	-0.0683787	1.23717	0.307041	0.777129	-0.363775	P13489	13	44.3	4.4697e-156
IPI00015954	GTP-binding protein SAR1a	0.9535	-0.0686948	1.04355	0.0615034	0.877484	-0.188555	Q9NR31	4	27.3	7.7024e-28
IPI00398922	Protein phosphatase 1 regulatory subunit 14B	0.953477	-0.0687299	1.35959	0.44317	0.77167	-0.373944	Q96C90	1	6.5	2.8368e-18
IPI00374657	vesicle-associated membrane protein-associated protein A isoform 1	0.953465	-0.0687475	0.909889	-0.136238	1.07947	0.110328	A6NDZ0	10	43.2	2.9306e-53
IPI00030654	Isoform 2 of Cleavage and polyadenylation specificity factor subunit 6	0.953338	-0.0689407	1.20092	0.26414	0.79211	-0.336227	Q16630-2	3	9	2.638e-196
IPI00103940	Major facilitator superfamily domain-containing protein 10	0.95321	-0.0691339	1.09755	0.134282	1.03075	0.0436965	Q14728	3	10.5	1.1526e-10
IPI00399265	tumor protein D52-like 2 isoform a	0.95263	-0.0700126	1.17058	0.227217	0.717874	-0.478197	Q5JWU6	9	42.4	1.045e-137
IPI00744598	DNA polymerase	0.952618	-0.0700302	0.811075	-0.302092	1.20738	0.27188	Q9Y5S4	3	2.6	1.6908e-17
IPI00555956	Proteasome subunit beta type-4	0.952235	-0.0706104	1.20714	0.27159	0.819287	-0.287559	P28070	6	37.5	7.7505e-34
IPI00025347	Probable ribosome biogenesis protein NEP1	0.951573	-0.0716132	0.960624	-0.0579564	1.10042	0.138058	Q92979	4	22.1	0.00060196
IPI00303292	Importin subunit alpha-1	0.95068	-0.0729689	0.918283	-0.122989	1.3915	0.476646	P52294	11	32.9	5.0636e-169
IPI00023860	Nucleosome assembly protein 1-like 1	0.950297	-0.0735503	1.0098	0.0140665	0.925822	-0.111194	P55209	12	54.7	1.2846e-267
IPI00296563	GTP-binding protein GUF1 homolog	0.950157	-0.0737617	1.22295	0.290369	0.796118	-0.328946	Q8N442	2	4.8	4.1755e-26
IPI00000105	Major vault protein	0.950088	-0.0738675	0.872875	-0.196153	1.27676	0.352491	Q14764	22	40.6	4.214e-107
IPI00291607	Inositol 1,4,5-trisphosphate receptor type 3	0.949972	-0.0740438	0.843187	-0.246075	0.993177	-0.00987722	Q14573	49	28.1	0
IPI00395558	Inositol 1,4,5-triphosphate receptor-interacting protein	0.949867	-0.0742024	0.986423	-0.019722	0.640717	-0.642241	Q8IWB1	4	10.2	8.3171e-50
IPI00643920	cDNA FLJ54957, highly similar to Transketolase	0.949403	-0.0749078	0.863508	-0.211718	1.0641	0.0896305	B4DE31	36	78.8	0
IPI00022334	Ornithine aminotransferase, mitochondrial	0.949403	-0.0749078	0.693146	-0.52877	1.27571	0.351296	P04181	19	63.6	2.2358e-248
IPI00012490	Isoform XD of Plasma membrane calcium-transporting ATPase 4	0.949275	-0.0751018	1.04948	0.0696775	1.02845	0.0404648	P23634-1	9	10.2	7.4249e-103
IPI00163084	Pre-mRNA-splicing factor SYF1	0.949147	-0.0752959	0.584651	-0.774353	1.41274	0.498499	Q9HCS7	2	4.1	1.1752e-13
IPI00297084	Dolichyl-diphosphooligosaccharide--protein glycosyltransferase 48 kDa subunit	0.949055	-0.0754371	1.01215	0.0174276	1.03181	0.0451753	P39656	19	58.3	1.1134e-116
IPI00000643	BAG family molecular chaperone regulator 2	0.94837	-0.0764785	1.01122	0.0160997	0.979531	-0.0298369	O95816	5	25.1	1.0197e-09
IPI00909904	cDNA FLJ61383, highly similar to Serine/threonine-protein kinase 24	0.94772	-0.0774677	1.04435	0.062601	1.0469	0.0661182	Q9Y6E0-2	5	17.8	1.1501e-64
IPI00179415	Isoform 1 of Serine/threonine-protein phosphatase 2B catalytic subunit alpha isoform	0.947592	-0.077662	1.12959	0.175799	0.709062	-0.496016	Q08209-1	7	15.2	3.8402e-29
IPI00329536	Early endosome antigen 1	0.947499	-0.0778034	0.981123	-0.0274937	0.996252	-0.00541714	Q15075	74	58	0
IPI00554788	Keratin, type I cytoskeletal 18	0.947209	-0.0782454	1.45701	0.543006	0.672708	-0.571948	P05783	30	74.4	0
IPI00008708	Ribosomal L1 domain-containing protein 1	0.947139	-0.0783514	0.816019	-0.293326	1.17634	0.234306	O76021	17	36.3	3.3034e-286
IPI00940113	cDNA, FLJ93510, highly similar to Homo sapiens JTV1 gene (JTV1), mRNA	0.946594	-0.0791827	1.0277	0.0394128	0.920632	-0.119303	B2R7M3	7	41.2	5.5728e-71
IPI00003817	Rho GDP-dissociation inhibitor 2	0.946513	-0.0793065	1.21716	0.28352	0.774563	-0.368546	P52566	2	14.9	1.6846e-15
IPI00218922	Translocation protein SEC63 homolog	0.94642	-0.0794481	0.793958	-0.332865	0.84681	-0.239891	Q9UGP8	8	16.8	1.6788e-13
IPI00386119	Isoform 5 of Splicing factor 1	0.94642	-0.0794481	0.710742	-0.492602	1.22468	0.292403	Q15637-5	11	21.1	8.5125e-106
IPI00008575	Isoform 1 of KH domain-containing, RNA-binding, signal transduction-associated protein 1	0.946385	-0.0795011	0.763887	-0.388569	1.2487	0.32043	Q07666-1	10	23	1.9596e-108
IPI00303954	cytochrome b5 outer mitochondrial membrane precursor	0.945445	-0.0809351	1.06193	0.0866881	1.07092	0.0988516	O43169	5	59.3	4.062e-48
IPI00549467	Omega-amidase NIT2	0.945271	-0.0812008	1.04659	0.0657001	0.895435	-0.159339	Q9NQR4	5	30.4	1.2021e-45
IPI00029081	Isoform Alpha of DNA ligase 3	0.945131	-0.0814134	1.08558	0.118464	0.861638	-0.214847	P49916-1	3	3	1.0951e-18
IPI00009305	Glucosamine-6-phosphate isomerase 1	0.945096	-0.0814666	1.00689	0.0099129	0.735393	-0.443413	P46926	6	34.6	1.1878e-51
IPI00028957	Isoform 2 of Ubiquitin conjugation factor E4 A	0.945015	-0.0815906	1.05749	0.0806479	0.879224	-0.185698	Q14139-2	11	17	1.1013e-123
IPI00413641	Aldose reductase	0.944806	-0.0819096	1.2879	0.365023	0.832577	-0.264344	P15121	13	50.3	7.1331e-100
IPI00003362	HSPA5 protein	0.944771	-0.0819628	0.831301	-0.266557	1.13502	0.182716	P11021	39	55.3	0
IPI00377261	Isoform 1 of Far upstream element-binding protein 3	0.944574	-0.0822642	0.955489	-0.0656892	1.09898	0.136167	Q96I24-1	11	23.3	3.8396e-60
IPI00177437	Isoform 1 of Crooked neck-like protein 1	0.944179	-0.0828671	1.32649	0.407615	1.01999	0.0285528	Q9BZJ0-1	3	4.2	4.2825e-43
IPI00297492	Dolichyl-diphosphooligosaccharide--protein glycosyltransferase subunit STT3A	0.94397	-0.0831864	1.04236	0.0598555	0.911791	-0.133224	P46977	20	27.4	3.0832e-133
IPI00023004	Eukaryotic translation initiation factor 1A, Y-chromosomal	0.943947	-0.0832218	0.920981	-0.118757	0.320844	-1.64006	O14602	2	17.4	2.2405e-06
IPI00018415	Transmembrane 9 superfamily member 2	0.94382	-0.083417	0.836915	-0.256846	1.0467	0.0658533	Q99805	12	22.6	2.2183e-160
IPI00332106	Isoform 1 of Pre-B-cell leukemia transcription factor-interacting protein 1	0.943773	-0.083488	0.940645	-0.088278	1.09312	0.128451	Q96AQ6-1	5	8.6	1.0865e-14
IPI00016910	Eukaryotic translation initiation factor 3 subunit C	0.943576	-0.0837897	1.15824	0.211931	0.782635	-0.353588	Q99613	21	30.2	0
IPI00215790	60S ribosomal protein L38	0.943564	-0.0838074	1.02916	0.0414682	0.915587	-0.127231	P63173	3	35.7	7.7413e-16
IPI00025239	NADH dehydrogenase [ubiquinone] iron-sulfur protein 2, mitochondrial	0.943378	-0.0840914	1.1785	0.236956	0.820892	-0.284736	O75306	16	50.1	8.5915e-153
IPI00016868	Telomere length regulation protein TEL2 homolog	0.943344	-0.0841446	1.0735	0.102323	0.560331	-0.83565	Q9Y4R8	3	7.5	2.7003e-49
IPI00221300	Translation initiation factor eIF-2B subunit alpha	0.943309	-0.0841979	1.04457	0.0629037	0.635528	-0.653973	Q14232	5	34.1	1.8672e-33
IPI00019812	Serine/threonine-protein phosphatase 5	0.943286	-0.0842334	1.30005	0.378566	0.900183	-0.15171	P53041	8	23.4	1.11e-33
IPI00026302	60S ribosomal protein L31	0.943274	-0.0842512	1.34629	0.428991	0.78423	-0.350651	P62899	3	26.4	1.7585e-54
IPI00006164	Integrin-linked kinase-associated serine/threonine phosphatase 2C	0.943274	-0.0842512	0.983616	-0.0238336	0.887949	-0.171451	Q9H0C8	2	4.8	0.0069344
IPI00941534	Isoform 1 of Septin-7	0.943146	-0.0844465	0.890595	-0.167159	1.07746	0.107628	Q16181-1	12	31.1	3.4236e-106
IPI00219446	Phosphatidylethanolamine-binding protein 1	0.942903	-0.0848194	0.9972	-0.00404572	1.05093	0.0716695	P30086	7	51.9	7.4083e-37
IPI00220487	Isoform 1 of ATP synthase subunit d, mitochondrial	0.942845	-0.0849082	0.657775	-0.604334	0.968384	-0.0463494	O75947-1	8	50.3	9.3918e-45
IPI00219153	60S ribosomal protein L22	0.942752	-0.0850503	1.11325	0.154782	0.959591	-0.059509	P35268	2	30.5	8.6704e-31
IPI00029741	Integrin beta-5	0.942009	-0.0861876	1.03801	0.0538158	0.985105	-0.021651	P18084	6	10.6	3.6119e-131
IPI00005129	Isoform 1 of Secretory carrier-associated membrane protein 1	0.941962	-0.0862587	0.807529	-0.308414	0.967903	-0.0470654	O15126-1	2	14.8	0.0042957
IPI00641990	Isoform 1 of LAS1-like protein	0.941904	-0.0863476	1.1085	0.148611	0.928916	-0.10638	Q9Y4W2-1	22	44.4	2.5894e-265
IPI00031023	Protein flightless-1 homolog	0.941579	-0.0868455	1.12388	0.168488	0.80812	-0.307358	Q13045	14	16.4	5.5452e-92
IPI00008529	60S acidic ribosomal protein P2	0.941463	-0.0870233	1.11874	0.161881	0.888055	-0.171279	P05387	5	84.3	1.4029e-120
IPI00783835	zinc finger protein 294	0.941452	-0.0870411	1.04418	0.062374	0.775812	-0.366221	O94822	5	5.8	9.7641e-51
IPI00006980	UPF0568 protein C14orf166	0.94144	-0.0870589	1.10438	0.143237	0.813781	-0.297288	Q9Y224	5	26.6	3.2949e-68
IPI00031812	Nuclease-sensitive element-binding protein 1	0.941428	-0.0870767	0.810733	-0.302701	1.10763	0.147476	P67809	12	53.1	0
IPI00291783	Gem-associated protein 5	0.940929	-0.0878418	1.0832	0.115294	0.75887	-0.398076	Q8TEQ6	27	26.3	4.4673e-265
IPI00746165	Isoform 1 of WD repeat-containing protein 1	0.940419	-0.0886251	1.04311	0.0608975	0.93915	-0.0905717	O75083-1	17	48	3.7466e-91
IPI00020599	Calreticulin	0.940337	-0.0887497	0.763148	-0.389966	1.22506	0.292855	P27797	28	83	0
IPI00022793	Trifunctional enzyme subunit beta, mitochondrial	0.940302	-0.0888032	0.856826	-0.222926	1.02518	0.0358741	P55084	19	52.3	1.102e-146
IPI00375145	Isoform Short of Ubiquitin carboxyl-terminal hydrolase 5	0.940221	-0.0889278	1.04981	0.0701292	0.929252	-0.105858	P45974-2	26	48.5	0
IPI00301419	COP9 signalosome complex subunit 7a	0.939711	-0.0897117	1.21007	0.275088	0.827359	-0.273414	Q9UBW8	2	10.9	1.1423e-42
IPI00301058	Vasodilator-stimulated phosphoprotein	0.939223	-0.0904604	0.931758	-0.101973	1.03786	0.0536157	P50552	6	18.7	8.9883e-44
IPI00027180	CAAX prenyl protease 1 homolog	0.93906	-0.09071	0.991859	-0.0117929	0.960398	-0.0582959	O75844	8	25.3	1.1118e-94
IPI00744692	Transaldolase	0.938933	-0.0909062	1.07401	0.103004	0.946454	-0.0793958	P37837	8	24.3	1.1747e-62
IPI00412404	ATP-dependent RNA helicase SUPV3L1, mitochondrial	0.938724	-0.0912273	1.28143	0.357749	1.08514	0.117885	Q8IYB8	2	2.9	0.0034248
IPI00063903	Up-regulated during skeletal muscle growth protein 5	0.938457	-0.0916376	0.804817	-0.313267	0.921939	-0.117256	Q96IX5	1	25.9	5.0308e-55
IPI00033036	Methionine aminopeptidase 2	0.938132	-0.0921373	0.999281	-0.00103755	0.912445	-0.132191	P50579	9	30.8	7.2671e-102
IPI00299512	Isoform 2 of Neurofibromin	0.938027	-0.092298	0.948943	-0.0756064	1.04738	0.0667802	P21359-1	8	4.9	1.4231e-110
IPI00170429	Isoform 1 of 2-oxoglutarate and iron-dependent oxygenase domain-containing protein 1	0.937865	-0.092548	0.803489	-0.31565	1.10215	0.140324	Q8N543-1	2	6.8	7.9507e-56
IPI00219678	Eukaryotic translation initiation factor 2 subunit 1	0.937505	-0.0931016	1.32689	0.408047	0.784538	-0.350085	P05198	9	41	3.3107e-160
IPI00411623	Isoform 1 of Protein enabled homolog	0.937482	-0.0931373	0.971538	-0.0416581	1.01307	0.018733	Q8N8S7-1	6	16.1	7.0694e-30
IPI00102069	Eukaryotic translation initiation factor 3 subunit M	0.937064	-0.0937805	1.10969	0.150161	0.827292	-0.273532	Q7L2H7	10	44.1	2.2733e-115
IPI00031109	Mimitin, mitochondrial	0.937018	-0.093852	0.616625	-0.697534	1.51268	0.597112	Q8N183	4	30.8	3.1557e-53
IPI00295098	Signal recognition particle receptor subunit beta	0.936785	-0.0942095	0.927033	-0.109307	1.05247	0.0737787	Q9Y5M8	10	46.5	8.2397e-139
IPI00033516	Isoform 1 of Gamma-tubulin complex component 3	0.936762	-0.0942452	1.23807	0.308094	0.877465	-0.188587	Q96CW5-1	4	8.8	0.0004059
IPI00023647	Isoform 1 of Ubiquitin-like modifier-activating enzyme 6	0.935973	-0.0954614	1.15417	0.206856	0.770363	-0.376389	A0AVT1-1	26	34.1	1.3816e-168
IPI00294834	Aspartyl/asparaginyl beta-hydroxylase	0.93588	-0.0956045	0.926266	-0.110501	0.834067	-0.261765	Q12797	11	27.4	2.7391e-209
IPI00478657	G-rich sequence factor 1	0.935683	-0.0959087	0.42727	-1.22678	2.76398	1.46675	Q12849	5	19.2	3.0238e-18
IPI00014312	Isoform 1 of Cullin-3	0.935265	-0.0965532	0.971921	-0.0410888	0.841995	-0.248116	Q13618-1	7	13.5	2.5106e-64
IPI00796934	cDNA FLJ78093, highly similar to Homo sapiens ribosomal protein L29 (RPL29), mRNA	0.935207	-0.0966427	0.60185	-0.732524	1.97242	0.979967	A8K0H3	2	14.5	1.1168e-26
IPI00328842	Rho GTPase activating protein 4 isoform 1	0.934812	-0.0972516	1.03147	0.0447087	1.11167	0.152724	Q86UY3	2	4.9	3.3282e-11
IPI00290799	Uncharacterized protein C18orf19	0.934429	-0.0978429	0.683259	-0.549496	1.22766	0.295908	Q96ND0	1	8.1	7.0915e-18
IPI00018026	Isoform 3 of BSD domain-containing protein 1	0.934336	-0.0979863	0.73906	-0.436236	1.43321	0.519252	Q9NW68-3	1	4	3.9294e-29
IPI00641829	Isoform 2 of Spliceosome RNA helicase BAT1	0.934278	-0.0980759	1.00995	0.0142816	1.09552	0.131618	Q13838-2	14	41.5	3.7315e-109
IPI00295386	Carbonyl reductase [NADPH] 1	0.934209	-0.0981835	1.18143	0.240539	0.905987	-0.142438	P16152	7	37.5	1.0706e-63
IPI00021626	Isoform 1 of RNA-binding protein 42	0.934174	-0.0982372	0.883433	-0.178808	1.19883	0.261624	Q9BTD8-1	2	6.2	6.201e-10
IPI00936738	Isoform 1 of Torsin-1A-interacting protein 1	0.933338	-0.0995285	0.917639	-0.124001	1.07659	0.10647	Q5JTV8-1	15	37.4	3.6116e-73
IPI00162330	39S ribosomal protein L37, mitochondrial	0.933338	-0.0995285	0.874313	-0.193779	1.07255	0.101051	Q9BZE1	10	35.2	3.8891e-74
IPI00152540	Isoform 1 of CD109 antigen	0.933094	-0.0999053	0.438854	-1.18819	2.12022	1.08421	Q6YHK3-1	23	26	0
IPI00784044	Isoform 1 of Methylcrotonoyl-CoA carboxylase beta chain, mitochondrial	0.93292	-0.100175	0.884405	-0.177221	1.27638	0.352057	Q9HCC0-1	12	30	5.2979e-92
IPI00924944	82 kDa protein	0.932653	-0.100587	0.839695	-0.252062	1.00577	0.00829455	Q2PZI1-1	3	5.5	7.4666e-05
IPI00843975	Ezrin	0.932642	-0.100605	1.22032	0.287264	0.794224	-0.332381	P15311	29	50.5	3.2319e-275
IPI00306382	Isoform 1 of Secretory carrier-associated membrane protein 3	0.932642	-0.100605	1.1468	0.197617	0.845474	-0.242168	O14828-1	4	18.7	9.8756e-86
IPI00291928	Ras-related protein Rab-14	0.93263	-0.100623	0.969114	-0.0452618	1.08188	0.113535	P61106	10	64.2	7.7028e-101
IPI00027988	Transcriptional repressor CTCF	0.932572	-0.100713	0.935592	-0.0960488	1.0789	0.109557	P49711	8	16.4	4.4844e-56
IPI00025796	NADH dehydrogenase [ubiquinone] iron-sulfur protein 3, mitochondrial	0.932549	-0.100749	0.942986	-0.0846911	0.920382	-0.119695	O75489	9	47.3	6.3184e-66
IPI00002790	Isoform 1 of Protein sel-1 homolog 1	0.932456	-0.100893	0.90993	-0.136173	0.922064	-0.117061	Q9UBV2-1	8	19.5	7.6309e-43
IPI00173946	Isoform 1 of Protein TANC1	0.932258	-0.101198	0.731063	-0.451932	0.702969	-0.508466	Q9C0D5-1	1	1.1	1.4047e-20
IPI00337397	Isoform 5 of Nuclear pore complex protein Nup98-Nup96	0.932108	-0.101432	1.03949	0.0558699	0.845503	-0.242119	P52948-5	15	12.8	3.0905e-171
IPI00010706	Glutathione synthetase	0.93191	-0.101737	1.59093	0.66987	0.603584	-0.728372	P48637	6	15.4	1.0894e-58
IPI00795769	52 kDa protein	0.931678	-0.102097	0.968772	-0.0457715	0.963867	-0.053094	P82979	5	13.7	7.8511e-26
IPI00015806	Isoform 1 of General transcription factor 3C polypeptide 3	0.931516	-0.102348	0.769118	-0.378723	1.02883	0.0410039	Q9Y5Q9-1	11	14.3	2.8422e-32
IPI00414717	Isoform 2 of Golgi apparatus protein 1	0.931283	-0.102708	0.741471	-0.431539	1.31318	0.39307	Q92896-2	18	17.5	2.2677e-72
IPI00026833	Adenylosuccinate synthetase isozyme 2	0.931121	-0.10296	0.950723	-0.0729025	0.740707	-0.433025	P30520	8	24.6	3.9017e-91
IPI00909064	Isoform 2 of Bifunctional coenzyme A synthase	0.931016	-0.103121	1.27309	0.34833	0.7101	-0.493906	Q13057-2	6	14.7	4.239e-37
IPI00329672	Myosin-Ie	0.931016	-0.103121	1.00521	0.00749756	1.04642	0.0654559	Q12965	5	9.3	1.9892e-32
IPI00007682	V-type proton ATPase catalytic subunit A	0.930575	-0.103805	0.973578	-0.0386314	0.935403	-0.0963406	P38606	13	35.8	7.0381e-242
IPI00867552	Isoform 3 of Mediator of RNA polymerase II transcription subunit 25	0.930541	-0.103859	0.834094	-0.261717	0.9362	-0.0951109	Q71SY5-3	2	5.9	9.6699e-50
IPI00328318	175 kDa protein	0.930308	-0.104219	1.24864	0.320361	0.781895	-0.354953	P35573-1	6	6.7	3.1011e-07
IPI00552671	Plexin-A1	0.930146	-0.104471	1.06939	0.0967916	0.763098	-0.390059	Q9UIW2	2	2	5.4354e-25
IPI00059292	Protein mago nashi homolog 2	0.92996	-0.104759	1.10487	0.14388	1.03671	0.0520118	Q96A72	3	31.1	0.0021371
IPI00935906	dynactin 1 isoform 3	0.929682	-0.105191	1.05688	0.079807	0.83053	-0.267895	B4DM45	23	29.8	7.1444e-174
IPI00873344	Isoform 3 of Tumor protein D52	0.929589	-0.105335	1.16465	0.219891	0.711388	-0.491292	P55327-3	7	49.2	1.3115e-47
IPI00019472	Neutral amino acid transporter B(0)	0.929449	-0.105552	0.868959	-0.202641	1.08947	0.123623	Q15758	13	36.2	2.0841e-262
IPI00010796	Protein disulfide-isomerase	0.92931	-0.105768	0.87812	-0.187511	1.14002	0.189053	P07237	36	73.8	0
IPI00021428	Actin, alpha skeletal muscle	0.929101	-0.106092	0.92439	-0.113426	1.06506	0.0909328	P68133	14	31.8	7.9587e-226
IPI00154451	cDNA FLJ55586, highly similar to MMS19-like protein	0.928834	-0.106507	1.01603	0.0229408	1.14367	0.193667	B4DQX2	10	18.7	1.4605e-181
IPI00783250	TRIP12 protein	0.928811	-0.106543	0.583487	-0.777228	1.48405	0.569537	Q14CF1	12	12	3.1144e-45
IPI00026848	Alpha-2-macroglobulin receptor-associated protein	0.9283	-0.107336	1.16474	0.22001	0.775485	-0.366829	P30533	7	21.6	2.4044e-49
IPI00020557	Prolow-density lipoprotein receptor-related protein 1	0.927592	-0.108437	0.881748	-0.181561	0.96329	-0.0539573	Q07954	68	20.4	0
IPI00101952	Isoform 1 of Solute carrier family 35 member E1	0.927557	-0.108491	1.14238	0.192042	0.847895	-0.238042	Q96K37-1	2	8.8	8.0793e-19
IPI00215920	ADP-ribosylation factor 6	0.927418	-0.108708	1.14398	0.194064	0.920258	-0.11989	P62330	4	28.6	2.3516e-20
IPI00784233	Isoform 1 of PERQ amino acid-rich with GYF domain-containing protein 2	0.927186	-0.109069	1.16147	0.21595	1.0443	0.0625381	Q6Y7W6-1	10	12.9	3.7766e-182
IPI00024933	Isoform 1 of 60S ribosomal protein L12	0.927023	-0.109322	1.09288	0.128131	0.872391	-0.196953	P30050-1	8	60	1.7657e-175
IPI00844578	ATP-dependent RNA helicase A	0.926838	-0.109611	0.863467	-0.211786	1.07553	0.105052	Q08211	57	58.3	0
IPI00005707	C-type mannose receptor 2	0.926176	-0.110642	0.994201	-0.00839092	1.09004	0.124387	Q9UBG0	6	8	8.0563e-61
IPI00219301	Myristoylated alanine-rich C-kinase substrate	0.925596	-0.111546	0.631935	-0.662152	1.12925	0.175368	P29966	8	47.9	4.0855e-129
IPI00168878	Torsin-1A-interacting protein 2	0.925526	-0.111654	0.676015	-0.564873	1.22362	0.291157	Q8NFQ8	9	28.9	1.2405e-86
IPI00943550	mannose 6 phosphate receptor binding protein 1 isoform 2	0.925352	-0.111926	1.19636	0.258652	0.799289	-0.323211	O60664-2	11	40.9	2.3462e-260
IPI00022624	Retinoic acid-induced protein 3	0.924783	-0.112813	0.51658	-0.952937	1.9655	0.974897	Q8NFJ5	5	23	6.0171e-12
IPI00910513	G1 to S phase transition 1 isoform 1	0.924609	-0.113085	0.93881	-0.0910951	1.05353	0.075227	A8K2W7	14	32.8	2.9143e-58
IPI00164949	Isoform NELF-C of Negative elongation factor C/D	0.924365	-0.113465	0.852471	-0.230277	1.04228	0.0597475	Q8IXH7-1	12	27.3	1.5071e-120
IPI00477231	Bifunctional protein NCOAT	0.923924	-0.114153	1.08092	0.112263	0.824668	-0.278114	O60502-1	13	20.2	2.9749e-111
IPI00032406	DnaJ homolog subfamily A member 2	0.922984	-0.115622	0.896045	-0.158358	1.0689	0.0961303	O60884	14	50.5	4.9863e-140
IPI00018768	Translin	0.922938	-0.115695	0.919789	-0.120625	0.724966	-0.464014	Q15631	2	15.8	7.4526e-15
IPI00328840	THO complex 4	0.922914	-0.115731	0.896976	-0.156859	0.817259	-0.291134	Q86V81	5	25	1.8278e-83
IPI00019169	cDNA, FLJ96508, Homo sapiens SH3-domain GRB2-like 1 (SH3GL1), mRNA	0.922891	-0.115768	1.15027	0.201969	0.899193	-0.153298	Q6FGM0	7	29.9	4.0197e-81
IPI00401264	Endoplasmic reticulum resident protein ERp44	0.922694	-0.116076	0.974824	-0.036786	0.94902	-0.0754899	Q9BS26	14	45.1	1.7668e-210
IPI00328415	cDNA FLJ56301, highly similar to NADH-cytochrome b5 reductase	0.922543	-0.116312	0.877366	-0.188749	1.08649	0.119673	P00387-1	9	40.4	2.2785e-97
IPI00514587	Seryl-tRNA synthetase	0.92245	-0.116457	1.43222	0.518253	0.762176	-0.391805	Q5T5C7	15	36.4	1.1434e-152
IPI00290514	Integrator complex subunit 9	0.92245	-0.116457	0.639206	-0.645646	1.03825	0.0541499	Q9NV88	3	6.1	3.3028e-11
IPI00006970	Mitochondrial 28S ribosomal protein S2	0.922032	-0.117111	1.00822	0.0118148	1.05526	0.0775938	Q9Y399	2	9.4	3.4265e-91
IPI00642584	Isoform 1 of Uncharacterized protein KIAA0090	0.921893	-0.117329	0.933962	-0.0985637	0.918576	-0.122529	Q8N766-1	29	41.5	0
IPI00478230	cDNA FLJ59722, highly similar to Retinoblastoma-binding protein 5	0.921417	-0.118074	0.698911	-0.51682	1.52047	0.604516	Q15291-1	3	6.8	0.00014596
IPI00745125	Sterol O-acyltransferase 1	0.921034	-0.118674	0.82429	-0.278776	1.05554	0.0779879	P35610	10	24.4	7.4827e-74
IPI00940127	cDNA FLJ59753	0.92086	-0.118946	0.995748	-0.00614725	0.838603	-0.253941	B4DTA9	7	24.9	6.7391e-39
IPI00005161	Actin-related protein 2/3 complex subunit 2	0.920825	-0.119001	1.00839	0.0120499	0.946617	-0.0791468	O15144	9	38	6.3994e-44
IPI00183603	Oligosaccharyltransferase complex subunit OSTC	0.920674	-0.119237	0.655954	-0.608334	1.3449	0.427496	Q9NRP0	1	8.1	1.9711e-11
IPI00554541	Isoform 1 of Acetolactate synthase-like protein	0.920639	-0.119292	0.895784	-0.158777	1.02691	0.0383063	A1L0T0-1	18	58.5	2.6715e-289
IPI00016613	CSNK2A1 protein	0.920384	-0.119692	0.814718	-0.295627	0.964732	-0.0518	B2R6D7	14	42.6	4.7517e-133
IPI00305442	Ubiquitin-associated domain-containing protein 1	0.920221	-0.119947	0.73209	-0.449906	1.42504	0.511006	Q9BSL1	1	6.4	7.1787e-06
IPI00168407	Pyruvate dehydrogenase phosphatase regulatory subunit, mitochondrial	0.920024	-0.120256	1.07108	0.0990621	0.796233	-0.328738	Q8NCN5	22	34.4	4.7602e-254
IPI00017292	Isoform 1 of Catenin beta-1	0.919711	-0.120748	0.972893	-0.0396464	1.09466	0.130479	P35222-1	28	55.2	0
IPI00018931	Vacuolar protein sorting-associated protein 35	0.919664	-0.120821	1.06705	0.0936291	0.844292	-0.244186	Q96QK1	25	44.6	0
IPI00013256	Isoform 1 of Cleavage stimulation factor 64 kDa subunit	0.919386	-0.121258	0.838161	-0.2547	0.99385	-0.0089004	P33240-1	12	33.4	3.061e-139
IPI00411706	S-formylglutathione hydrolase	0.919096	-0.121713	0.984875	-0.0219869	0.875706	-0.191481	P10768	5	42.9	3.8887e-28
IPI00873767	68 kDa protein	0.918979	-0.121895	0.74258	-0.429382	1.30934	0.388841	Q96AE4-1	26	51.5	2.278e-248
IPI00290460	Eukaryotic translation initiation factor 3 subunit G	0.918446	-0.122734	0.931977	-0.101634	0.922948	-0.115678	O75821	9	36.6	8.7544e-150
IPI00017567	Isoform Long of Endoglin	0.917946	-0.123518	0.453794	-1.13989	2.01768	1.0127	P17813-1	4	8.7	1.0703e-86
IPI00178203	Protein CTF18 homolog	0.917888	-0.123609	0.964335	-0.0523939	0.896713	-0.157281	Q96S08	3	3.5	0.0035453
IPI00014402	CDNA FLJ20030 fis, clone ADSU02156	0.917691	-0.12392	1.03436	0.0487443	0.87784	-0.187971	Q9NXW1	8	26.2	2.2521e-66
IPI00015140	Cytochrome b	0.917099	-0.124851	1.15562	0.208669	0.78818	-0.343403	P00156	3	6.8	0.0021781
IPI00031960	DNA-directed RNA polymerase I subunit RPA1	0.916437	-0.125892	0.687504	-0.54056	1.31953	0.400021	O95602	26	25.1	8.3517e-290
IPI00019463	Interferon-induced, double-stranded RNA-activated protein kinase	0.916368	-0.126001	1.66666	0.736956	0.704046	-0.506259	P19525	3	7.3	2.8477e-29
IPI00465054	Putative uncharacterized protein DKFZp686C1054	0.915996	-0.126586	0.885309	-0.175747	1.42283	0.508766	Q6MZT3	4	11.2	1.1414e-38
IPI00001710	Isoform 1 of Protein fat-free homolog	0.915962	-0.126641	1.10726	0.146988	0.83275	-0.264044	Q9UID3-1	2	5.5	5.8428e-11
IPI00397366	Isoform 1 of Liprin-beta-1	0.915962	-0.126641	0.98174	-0.0265878	0.866673	-0.20644	Q86W92-1	15	19.9	2.3414e-69
IPI00792312	Isoform 1 of Integrator complex subunit 3	0.915915	-0.126714	0.732939	-0.448234	1.13041	0.17684	Q68E01-1	11	18.3	8.2423e-102
IPI00022597	NEDD8-conjugating enzyme Ubc12	0.915822	-0.126861	1.15524	0.20819	0.853363	-0.228768	P61081	4	22.4	4.7289e-11
IPI00018364	Ras-related protein Rap-2b	0.915509	-0.127354	0.987532	-0.0181007	1.16269	0.217472	P61225	2	20.8	0.0015398
IPI00794402	28 kDa protein	0.915242	-0.127775	1.16715	0.222992	0.825649	-0.2764	P52565	8	41.8	2.0712e-163
IPI00855940	exportin 7 isoform a	0.914836	-0.128416	1.25794	0.331064	0.791995	-0.336437	A8K607	9	10.9	1.3579e-52
IPI00021458	EH domain-containing protein 3	0.914499	-0.128947	1.38772	0.472712	0.733817	-0.446508	Q9NZN3	13	29.5	3.4721e-146
IPI00221035	Isoform 1 of Transcription factor BTF3	0.914476	-0.128983	0.949833	-0.0742538	0.960984	-0.0574156	P20290-1	6	51	6.132e-92
IPI00015808	Nucleolar GTP-binding protein 2	0.913942	-0.129826	1.24515	0.31632	0.895099	-0.159881	Q13823	5	7.9	1.0456e-06
IPI00218733	Superoxide dismutase [Cu-Zn]	0.91328	-0.130871	1.38676	0.471715	0.899625	-0.152604	P00441	5	60.4	1.7739e-49
IPI00307572	Transmembrane protein 165	0.91328	-0.130871	0.832136	-0.265108	1.20623	0.270502	Q9HC07	3	16.7	1.9529e-68
IPI00016862	Isoform Mitochondrial of Glutathione reductase, mitochondrial	0.912781	-0.131659	1.19168	0.252993	0.841687	-0.248643	P00390-1	9	32.2	1.2331e-50
IPI00293350	Translin-associated protein X	0.912758	-0.131696	1.0253	0.0360447	0.793898	-0.332975	Q99598	1	6.6	1.5161e-97
IPI00871742	cDNA FLJ55044, highly similar to Dynamin-1-like protein	0.912433	-0.13221	1.16556	0.221027	0.772064	-0.373207	B4DSU8	22	43.7	0
IPI00005792	Isoform 1 of Polyadenylate-binding protein 2	0.91241	-0.132246	1.05417	0.0761011	0.828416	-0.271572	Q86U42-1	3	12.1	1.3111e-29
IPI00477971	Transducin beta-like protein 3	0.912247	-0.132503	1.25938	0.332712	0.845051	-0.24289	Q12788	7	12.7	1.9841e-46
IPI00398009	Isoform 2 of Importin-4	0.912096	-0.132742	1.19662	0.258966	0.731789	-0.4505	Q8TEX9-2	18	27.2	0
IPI00032533	WD repeat-containing protein 18	0.91191	-0.133036	1.05091	0.0716339	0.928205	-0.107485	Q9BV38	10	30.8	6.2167e-87
IPI00418797	DNA-directed RNA polymerase	0.911852	-0.133128	0.678699	-0.559157	1.28138	0.357694	Q9H9Y6-1	7	11.7	6.7957e-113
IPI00853009	Isoform 4 of CUG-BP- and ETR-3-like factor 1	0.911655	-0.13344	0.77895	-0.360397	1.38814	0.473155	Q92879-4	5	17.8	4.1673e-49
IPI00024670	Receptor expression-enhancing protein 5	0.91097	-0.134524	1.13741	0.185751	1.08082	0.112125	Q00765	5	20.1	6.3661e-06
IPI00018871	cDNA FLJ56285, highly similar to ADP-ribosylation factor-like protein 8B	0.910831	-0.134745	0.776472	-0.364995	1.29973	0.378213	B4E1J8	4	26.5	5.5888e-37
IPI00021954	Golgi-specific brefeldin A-resistance guanine nucleotide exchange factor 1	0.910785	-0.134818	1.14041	0.18955	0.693292	-0.528464	Q92538	24	18	2.7501e-188
IPI00168849	Isoform 1 of Cdc42-interacting protein 4	0.910703	-0.134947	1.13345	0.180723	0.836325	-0.257864	Q15642-1	2	5.7	1.0838e-19
IPI00640088	Casein kinase 2, beta polypeptide, isoform CRA_d	0.910564	-0.135168	0.803941	-0.314838	1.36902	0.453141	Q5SRQ6	4	24.4	6.3473e-16
IPI00174442	Protein FAM98A	0.910413	-0.135407	1.06891	0.0961449	0.88472	-0.176707	Q8NCA5	3	7.7	1.154e-12
IPI00029048	Tubulin--tyrosine ligase-like protein 12	0.910309	-0.135572	1.0193	0.0275804	0.968672	-0.04592	Q14166	17	44.3	3.9271e-71
IPI00019205	Enhanced at puberty protein 1	0.910146	-0.13583	0.70799	-0.4982	1.55564	0.637509	Q9H1B7	3	7.2	4.8961e-30
IPI00009342	Ras GTPase-activating-like protein IQGAP1	0.910088	-0.135922	1.10489	0.143898	0.841303	-0.249302	P46940	82	67.4	0
IPI00027350	Peroxiredoxin-2	0.909868	-0.136272	1.04795	0.0675676	0.88695	-0.173076	P32119	8	50	4.8268e-32
IPI00293655	ATP-dependent RNA helicase DDX1	0.909868	-0.136272	0.924432	-0.113362	0.987603	-0.0179964	Q92499	24	41.6	2.3625e-251
IPI00056334	Protein kinase C delta-binding protein	0.90981	-0.136364	0.867603	-0.204893	1.11974	0.163162	Q969G5	8	41.4	2.4692e-35
IPI00022228	Vigilin	0.909659	-0.136603	0.953736	-0.0683382	1.00423	0.00608733	Q00341	33	36.8	7.2604e-293
IPI00306661	E3 ubiquitin-protein ligase KCMF1	0.909543	-0.136787	0.896058	-0.158336	0.880732	-0.183225	Q9P0J7	1	4.5	3.9316e-97
IPI00001661	regulator of chromosome condensation 1 isoform a	0.909403	-0.137008	0.641562	-0.64034	1.48337	0.568883	Q16269	9	35.2	3.8777e-143
IPI00927658	Putative uncharacterized protein RPL32	0.909345	-0.1371	0.898646	-0.154175	0.98818	-0.0171544	C9JBL2	6	38.6	5.4931e-111
IPI00183508	twinfilin 1	0.908881	-0.137837	1.08425	0.116698	0.505727	-0.983568	Q12792-2	2	6.8	3.4246e-23
IPI00294159	Tricarboxylate transport protein, mitochondrial	0.9088	-0.137966	0.909588	-0.136715	1.22429	0.29195	P53007	7	31.5	7.4563e-31
IPI00008240	Methionyl-tRNA synthetase, cytoplasmic	0.908695	-0.138132	0.989394	-0.0153826	0.978282	-0.0316781	P56192	30	49.8	0
IPI00217013	Isoform 1 of Serine/threonine-protein phosphatase 4 regulatory subunit 3A	0.908614	-0.138261	0.930717	-0.103586	0.898991	-0.153621	Q6IN85-1	13	23.6	4.8957e-155
IPI00797384	Isoform 4 of La-related protein 4	0.908568	-0.138334	1.05864	0.0822163	0.788728	-0.342401	Q71RC2-4	6	12.5	2.2371e-42
IPI00396485	Elongation factor 1-alpha 1	0.90844	-0.138537	1.04487	0.0633197	0.908466	-0.138495	P68104	24	69	1.4999e-242
IPI00304612	60S ribosomal protein L13a	0.908289	-0.138777	1.16604	0.22162	0.888584	-0.170421	P40429	10	42.4	4.5713e-21
IPI00017672	cDNA FLJ25678 fis, clone TST04067, highly similar to PURINE NUCLEOSIDE PHOSPHORYLASE	0.908138	-0.139016	1.14224	0.191869	1.01326	0.0190067	P00491	10	47.4	3.743e-84
IPI00176903	Isoform 1 of Polymerase I and transcript release factor	0.907929	-0.139348	0.879708	-0.184903	1.13973	0.188688	Q6NZI2-1	16	46.2	0
IPI00473014	Destrin	0.907511	-0.140013	1.02991	0.0425236	0.93817	-0.0920783	P60981	5	34.5	8.1726e-26
IPI00009346	Transmembrane protein 14C	0.906768	-0.141194	0.971976	-0.0410075	1.07649	0.106341	Q9P0S9	2	41.1	4.0745e-65
IPI00219518	ADP-ribosylation factor-like protein 1	0.906768	-0.141194	0.845597	-0.241958	1.14492	0.195242	P40616	2	14.9	5.0516e-63
IPI00748093	Isoform 3 of Protein YIPF5	0.906745	-0.141231	0.98975	-0.0148635	0.821786	-0.283166	Q969M3-3	2	7.9	7.8425e-31
IPI00013679	Isoform 1 of Deoxyuridine 5-triphosphate nucleotidohydrolase, mitochondrial	0.906525	-0.141582	1.09234	0.127426	0.889535	-0.168877	P33316-1	8	42.5	2.7024e-75
IPI00005715	Isoform 1 of Ubiquitin conjugation factor E4 B	0.906258	-0.142007	0.818443	-0.289047	1.10042	0.138058	O95155-1	2	2.5	6.8925e-08
IPI00220906	Isoform 1 of Acyl-coenzyme A thioesterase 2, mitochondrial	0.906223	-0.142062	0.799573	-0.322699	1.30742	0.386721	P49753-1	4	19	6.9922e-56
IPI00783097	Glycyl-tRNA synthetase	0.905747	-0.14282	1.05377	0.0755575	0.839679	-0.25209	P41250	29	52.1	6.3585e-286
IPI00219825	Prosaposin	0.905457	-0.143282	0.830274	-0.268341	1.28416	0.360828	B1AVU8	2	4.3	3.8955e-47
IPI00335589	RNA methyltransferase-like protein 1	0.905317	-0.143504	0.638453	-0.647347	1.5936	0.672289	Q9HC36	5	16.9	7.4066e-18
IPI00021692	Isoform EXP42 of Muscleblind-like protein 1	0.905074	-0.143893	0.608697	-0.716204	1.18432	0.244055	Q9NR56-1	5	19.8	2.2831e-15
IPI00556553	Isoform 2 of ATP-binding cassette sub-family B member 7, mitochondrial	0.904969	-0.144059	0.735596	-0.443014	1.24841	0.320097	O75027-2	3	6	1.3694e-13
IPI00012074	Isoform 1 of Heterogeneous nuclear ribonucleoprotein R	0.904737	-0.14443	0.757492	-0.400697	1.26802	0.342576	O43390-1	21	43.8	2.3866e-224
IPI00007961	NADH-ubiquinone oxidoreductase chain 1	0.904714	-0.144467	0.736979	-0.440305	1.05766	0.0808746	P03886	4	11.9	1.2621e-90
IPI00011307	Bifunctional methylenetetrahydrofolate dehydrogenase/cyclohydrolase, mitochondrial	0.904691	-0.144504	0.45059	-1.15011	2.09802	1.06903	P13995	8	43.1	1.6646e-69
IPI00619921	Isoform 4 of Death-inducer obliterator 1	0.904354	-0.145041	0.883624	-0.178495	0.989525	-0.0151915	Q9BTC0-4	21	13.3	1.2012e-133
IPI00216192	Isoform 2 of Caseinolytic peptidase B protein homolog	0.903658	-0.146152	0.72497	-0.464007	1.1157	0.157952	Q9H078-2	18	39.6	7.4516e-139
IPI00759683	Isoform Beta of Caveolin-1	0.903646	-0.146171	0.789303	-0.34135	1.29791	0.376185	Q03135-2	7	51	3.0613e-40
IPI00797038	mitochondrial phosphoenolpyruvate carboxykinase 2 isoform 1 precursor	0.903321	-0.146689	1.23454	0.303971	0.730377	-0.453287	B4DW73	13	28.1	3.0056e-95
IPI00001159	Translational activator GCN1	0.903066	-0.147097	1.26015	0.33359	0.733711	-0.446716	Q92616	97	49.1	0
IPI00219755	signal peptidase complex subunit 1 homolog	0.902729	-0.147635	0.593031	-0.75382	1.46838	0.554229	Q9Y6A9	2	18.9	0.18379
IPI00011619	Bifunctional 3-phosphoadenosine 5-phosphosulfate synthetase 1	0.902706	-0.147672	0.767502	-0.381757	1.07899	0.109685	O43252	11	27.7	1.7126e-100
IPI00410666	Isoform 3 of Protein scribble homolog	0.902613	-0.147821	1.19926	0.262148	0.835364	-0.259523	Q14160-3	22	24.1	1.4862e-128
IPI00174390	Isoform 1 of 2,5-phosphodiesterase 12	0.902265	-0.148377	1.09662	0.133058	0.682068	-0.552012	Q6L8Q7-1	5	13.5	6.2331e-26
IPI00017375	Protein transport protein Sec23A	0.90223	-0.148433	1.01391	0.0199238	0.713117	-0.487788	Q15436	10	20.3	2.515e-124
IPI00159899	Similar to Ankyrin repeat and FYVE domain-containing protein 1	0.902125	-0.1486	1.06646	0.0928328	0.814597	-0.295841	Q9P2R3-1	7	9	1.9982e-19
IPI00290204	Isoform 1 of U1 small nuclear ribonucleoprotein 70 kDa	0.901905	-0.148953	0.75448	-0.406446	0.986546	-0.0195414	P08621-1	9	24.5	1.0063e-43
IPI00029629	E3 ubiquitin/ISG15 ligase TRIM25	0.901417	-0.149733	1.1032	0.141697	0.811695	-0.30099	Q14258	10	21	1.147e-94
IPI00219525	6-phosphogluconate dehydrogenase, decarboxylating	0.901127	-0.150198	1.12328	0.167714	0.844811	-0.2433	P52209	20	58.6	0
IPI00017704	Coactosin-like protein	0.901081	-0.150272	1.32363	0.404499	0.764943	-0.386575	Q14019	5	46.5	8.9865e-83
IPI00032851	Coatomer subunit zeta-1	0.900338	-0.151462	1.29001	0.367384	0.898395	-0.154578	P61923	3	24.3	1.1037e-15
IPI00304577	Isoform A of AP-2 complex subunit alpha-1	0.900338	-0.151462	1.00674	0.00969706	0.900778	-0.150756	O95782-1	28	39	1.4469e-242
IPI00644671	Isoform 1 of Coiled-coil and C2 domain-containing protein 1B	0.900164	-0.151741	1.04882	0.0687736	0.859927	-0.217714	Q5T0F9-1	2	3.4	0.00013193
IPI00910088	adaptor-related protein complex 1, mu 1 subunit isoform 1	0.90014	-0.151778	0.981082	-0.0275541	0.98251	-0.0254559	B3KNH5	13	37.7	1.8934e-42
IPI00550523	Isoform 1 of Atlastin-3	0.899978	-0.152038	0.853046	-0.229304	0.987219	-0.0185581	Q6DD88-1	20	56	0
IPI00759776	actinin, alpha 1 isoform a	0.899827	-0.15228	0.620775	-0.687858	1.38526	0.470155	A1L0V1	56	75.8	0
IPI00008422	Isoform 2 of SWI/SNF-related matrix-associated actin-dependent regulator of chromatin subfamily A containing DEAD/H box 1	0.899607	-0.152634	0.871492	-0.198441	1.00509	0.00732931	Q9H4L7-2	4	6.5	2.2221e-65
IPI00013976	Laminin subunit beta-1	0.899398	-0.152969	0.791617	-0.337126	1.19249	0.253971	P07942	51	38	0
IPI00329410	Dolichyldiphosphatase 1	0.899142	-0.153379	0.827549	-0.273084	1.16712	0.222947	Q86YN1	2	12.6	5.0987e-06
IPI00306960	Asparaginyl-tRNA synthetase, cytoplasmic	0.899131	-0.153397	1.10443	0.143308	0.849318	-0.235624	O43776	20	45.3	1.857e-301
IPI00005202	Membrane-associated progesterone receptor component 2	0.899096	-0.153453	1.16003	0.214163	0.869835	-0.201187	O15173	5	29.1	1.4562e-63
IPI00009822	Signal recognition particle 54 kDa protein	0.89898	-0.15364	1.02486	0.035428	1.06112	0.0855859	P61011	12	32.5	1.5501e-151
IPI00056499	Zinc finger protein 622	0.898933	-0.153714	1.10124	0.139134	0.732279	-0.449534	Q969S3	2	6.5	5.5369e-08
IPI00289819	Cation-independent mannose-6-phosphate receptor	0.898399	-0.154571	0.814115	-0.296695	1.08678	0.120056	P11717	60	33.6	0
IPI00852685	Isoform 1 of Protein diaphanous homolog 1	0.897981	-0.155242	1.21822	0.284769	0.771161	-0.374896	O60610-1	33	35.8	0
IPI00394679	Wolf-Hirschhorn syndrome candidate 2 protein	0.897865	-0.155429	0.827467	-0.273227	1.02623	0.0373609	Q9H3P2-7	1	4.8	6.2915e-32
IPI00027415	Isoform 1 of Probable ATP-dependent RNA helicase DHX36	0.897819	-0.155504	0.895415	-0.159372	0.815443	-0.294344	Q9H2U1-1	3	4.5	9.39e-16
IPI00008511	NADH-ubiquinone oxidoreductase chain 5	0.897796	-0.155541	0.811418	-0.301483	0.922996	-0.115603	P03915	4	12.4	2.8346e-35
IPI00096972	Isoform 1 of Histone-lysine N-methyltransferase, H3 lysine-9 specific 3	0.897494	-0.156026	0.898797	-0.153933	0.816298	-0.292832	Q96KQ7-1	2	3	8.3296e-37
IPI00183626	polypyrimidine tract-binding protein 1 isoform a	0.897134	-0.156604	0.843091	-0.246239	1.06198	0.0867613	Q9BUQ0	22	64.3	0
IPI00218342	C-1-tetrahydrofolate synthase, cytoplasmic	0.896925	-0.15694	1.00053	0.000760397	0.951086	-0.0723524	P11586	30	49.4	5.658e-191
IPI00020956	Hepatoma-derived growth factor	0.896879	-0.157015	0.859017	-0.219242	1.03066	0.043562	P51858	12	60.8	3.5164e-203
IPI00477949	Isoform 1 of Zinc finger MYM-type protein 4	0.89631	-0.15793	0.766749	-0.383174	0.810158	-0.303726	Q5VZL5-1	2	2.1	8.2018e-07
IPI00784224	Zinc finger RNA binding protein	0.896275	-0.157986	0.582309	-0.780143	1.2686	0.343232	Q96KR1	4	7.7	4.6446e-24
IPI00027728	High affinity cationic amino acid transporter 1	0.896113	-0.158248	1.16506	0.2204	0.742178	-0.430164	P30825	6	9.7	6.949e-47
IPI00008599	3-beta-hydroxysteroid-Delta(8),Delta(7)-isomerase	0.895706	-0.158902	0.750152	-0.414744	1.42716	0.513144	Q15125	3	16.5	1.0106e-30
IPI00479905	NADH dehydrogenase [ubiquinone] 1 beta subcomplex subunit 10	0.895544	-0.159164	1.15632	0.209541	0.903767	-0.145977	O96000	2	15.7	4.4006e-07
IPI00293078	Probable ATP-dependent RNA helicase DDX27	0.895196	-0.159725	0.670537	-0.57661	1.03873	0.0548174	Q96GQ7	13	19.2	8.7248e-81
IPI00293735	Elongator complex protein 1	0.895184	-0.159744	1.47029	0.556099	0.746954	-0.420909	O95163	2	3.1	1.3088e-31
IPI00927614	Isoform 3 of Golgin subfamily A member 4	0.895045	-0.159968	0.83163	-0.265987	1.00951	0.0136605	Q13439-3	52	26.8	0
IPI00303868	Glycogen [starch] synthase, muscle	0.894847	-0.160286	0.748468	-0.417987	0.655439	-0.609466	P13807	3	6.9	6.206e-12
IPI00292753	Isoform 6 of GTPase-activating protein and VPS9 domain-containing protein 1	0.894464	-0.160904	1.4099	0.495592	0.623919	-0.68057	Q14C86-6	8	9.1	4.1221e-24
IPI00328170	Mannosyl-oligosaccharide glucosidase	0.894395	-0.161016	0.855922	-0.224448	0.973477	-0.0387814	Q13724	29	59.3	0
IPI00010157	S-adenosylmethionine synthetase isoform type-2	0.894302	-0.161166	0.94159	-0.0868296	1.08303	0.115072	P31153	13	50.4	2.5867e-198
IPI00240812	165 kDa protein	0.894174	-0.161372	0.868589	-0.203255	1.07515	0.104537	Q9NTI5-1	16	15	1.5272e-17
IPI00419844	U4/U6.U5 tri-snRNP-associated protein 2	0.893977	-0.161691	0.755904	-0.403726	1.23208	0.301093	Q53GS9	7	20.5	4.0127e-59
IPI00013466	ATPase ASNA1	0.893675	-0.162178	0.994721	-0.00763602	0.905285	-0.143555	O43681	3	20.4	2.0942e-05
IPI00871279	Putative uncharacterized protein SLC38A1	0.893338	-0.162721	0.904165	-0.145342	0.970402	-0.043346	B5MEC5	3	5.3	0.025198
IPI00744115	propionyl-Coenzyme A carboxylase, alpha polypeptide isoform a precursor	0.892247	-0.164484	1.46563	0.551523	0.625754	-0.676332	P05165	2	3.3	2.8179e-06
IPI00030847	Transmembrane 9 superfamily member 3	0.891737	-0.16531	1.00394	0.00566863	0.910869	-0.134685	Q9HD45	13	22.1	2.7865e-97
IPI00910194	cDNA FLJ60565, highly similar to Nuclear pore complex protein Nup153	0.89169	-0.165386	1.05734	0.0804424	0.841159	-0.24955	B4DIK2	9	9.9	2.8513e-12
IPI00107745	Isoform 1 of Luc7-like protein 3	0.891435	-0.165799	0.908424	-0.138563	0.965501	-0.0506508	O95232-1	3	10	1.5177e-119
IPI00000861	Isoform 1 of LIM and SH3 domain protein 1	0.891365	-0.165912	1.04469	0.0630739	0.889727	-0.168565	Q14847-1	7	42.9	1.8214e-23
IPI00166132	Vacuolar protein sorting-associated protein 52 homolog	0.891203	-0.166175	0.609204	-0.715004	0.951634	-0.0715218	Q8N1B4	1	3.7	1.9244e-07
IPI00293276	Macrophage migration inhibitory factor	0.890785	-0.166851	1.31792	0.398262	0.734278	-0.445601	P14174	3	35.7	1.2587e-11
IPI00556645	Isoform 1 of Forkhead box protein K1	0.890704	-0.166983	0.963376	-0.0538286	0.793561	-0.333586	P85037-1	2	3.1	6.8852e-05
IPI00065671	Isoform 1 of Uridine-cytidine kinase 2	0.890704	-0.166983	0.710235	-0.493631	1.44551	0.531581	Q9BZX2-1	2	14.6	1.4889e-24
IPI00013808	Alpha-actinin-4	0.889473	-0.168977	0.586061	-0.770877	1.49491	0.580056	O43707	58	80.4	0
IPI00514424	Palmitoyl-protein thioesterase 1	0.88887	-0.169956	0.637193	-0.650197	1.26667	0.341044	Q5T0S6	5	26	2.0502e-71
IPI00018240	Isoform 1 of Protein SDA1 homolog	0.888498	-0.170559	0.707976	-0.498228	0.995099	-0.00708806	Q9NVU7-1	2	6.7	0.028693
IPI00719178	Isoform 9 of Multidrug resistance-associated protein 1	0.888428	-0.170672	1.19762	0.26017	0.787853	-0.344001	P33527-9	15	16.1	2.8502e-153
IPI00829826	Isoform 1 of Mediator of RNA polymerase II transcription subunit 1	0.888278	-0.170918	1.2539	0.326423	0.692101	-0.530946	Q15648-1	2	2	4.0755e-10
IPI00016250	Fragile X mental retardation syndrome-related protein 2	0.88815	-0.171125	1.02782	0.0395858	0.72735	-0.459279	P51116	11	21.1	5.7727e-92
IPI00844215	Isoform 1 of Spectrin alpha chain, brain	0.887825	-0.171653	0.696679	-0.521435	1.27494	0.350427	Q13813-1	167	76.1	0
IPI00017617	Probable ATP-dependent RNA helicase DDX5	0.887256	-0.172578	0.527439	-0.922925	1.77186	0.825267	P17844	30	56.4	1.5073e-282
IPI00026993	E3 ubiquitin-protein ligase RING2	0.887047	-0.172917	0.472459	-1.08174	1.30175	0.380451	Q99496	3	12.5	2.7565e-05
IPI00103509	NADH dehydrogenase ubiquinone 1 alpha subcomplex	0.886757	-0.173389	0.943835	-0.0833927	0.823631	-0.279931	Q8WXC9	5	19.1	8.7594e-50
IPI00005160	Actin-related protein 2/3 complex subunit 1B	0.886699	-0.173484	1.08265	0.114564	0.836844	-0.256969	O15143	2	7.3	0.00015968
IPI00017160	Vacuolar protein sorting-associated protein VTA1 homolog	0.886536	-0.173748	0.683902	-0.548138	1.1183	0.161304	Q9NP79	2	6.8	0.041486
IPI00012585	Beta-hexosaminidase subunit beta	0.886455	-0.17388	0.713782	-0.486445	1.18816	0.24873	P07686	9	27.5	5.9211e-43
IPI00216219	Isoform Long of Tight junction protein ZO-1	0.886119	-0.174428	0.976536	-0.034255	0.945474	-0.0808907	Q07157-1	28	23.4	2.6211e-277
IPI00001676	Isoform 2 of Nuclear protein localization protein 4 homolog	0.885677	-0.175147	0.981767	-0.0265476	0.980588	-0.0282808	Q8TAT6-2	15	35.3	5.3855e-181
IPI00295519	Isoform 1 of Uncharacterized protein C3orf17	0.885202	-0.175922	1.01262	0.018091	0.85666	-0.223206	Q6NW34-1	1	3	5.9161e-84
IPI00014311	cDNA FLJ56037, highly similar to Cullin-2	0.885144	-0.176017	0.834053	-0.261788	1.00682	0.00981006	Q13617	6	9.2	0.00025534
IPI00177728	Isoform 1 of Cytosolic non-specific dipeptidase	0.884842	-0.176509	1.1156	0.157813	0.629435	-0.667871	Q96KP4-1	6	18.5	1.3e-09
IPI00009841	Ewing sarcoma breakpoint region 1 isoform 1	0.883936	-0.177986	0.713494	-0.487026	1.00115	0.00166273	Q96MX4	5	11.8	1.7554e-110
IPI00001734	Phosphoserine aminotransferase	0.883925	-0.178005	0.928471	-0.107071	0.961272	-0.0569829	B4DHQ3	13	35.2	8.0008e-53
IPI00328748	mesencephalic astrocyte-derived neurotrophic factor	0.883611	-0.178516	0.648408	-0.625025	1.34951	0.432436	A8K878	3	14.1	0.0005483
IPI00291755	Isoform 1 of Nuclear pore membrane glycoprotein 210	0.883507	-0.178687	1.53752	0.620609	0.864569	-0.209948	Q8TEM1-1	3	2.4	5.1725e-13
IPI00216319	14-3-3 protein eta	0.883437	-0.1788	1.43058	0.516597	0.879627	-0.185036	Q04917	8	30.5	1.483e-69
IPI00025084	Calpain small subunit 1	0.883437	-0.1788	1.15439	0.20713	0.659754	-0.6	P04632	7	50.7	6.099e-44
IPI00029111	Collapsin response mediator protein 4 long variant	0.883217	-0.179161	0.86637	-0.206944	1.03729	0.052814	B3SXQ8	16	37.4	9.1338e-101
IPI00921996	stathmin 1 isoform b	0.883135	-0.179293	1.16537	0.22079	0.734893	-0.444393	B7Z8N4	2	13.2	0.0019245
IPI00479534	Cofactor required for Sp1 transcriptional activation, subunit 3, 130kDa	0.882567	-0.180223	0.871588	-0.198282	0.912358	-0.132328	Q5JWT2	7	9	1.6852e-90
IPI00220301	Peroxiredoxin-6	0.88252	-0.180299	1.03275	0.0464888	0.9005	-0.151202	P30041	16	76.3	8.332e-259
IPI00000877	Hypoxia up-regulated protein 1	0.881905	-0.181305	0.947656	-0.0775647	0.996829	-0.00458241	Q9Y4L1	43	54.9	0
IPI00016513	Ras-related protein Rab-10	0.881766	-0.181533	1.03487	0.0494508	0.741918	-0.430668	P61026	8	50	4.2981e-99
IPI00045839	Isoform 3 of Prolyl 3-hydroxylase 1	0.881592	-0.181818	0.870876	-0.199461	1.16375	0.218783	Q32P28-3	14	22.4	7.9768e-78
IPI00290043	Isoform Alpha-3B of Integrin alpha-3	0.881557	-0.181875	0.770474	-0.376182	1.08245	0.114304	P26006-1	14	16.7	9.3678e-87
IPI00007755	Ras-related protein Rab-21	0.881383	-0.18216	1.07054	0.0983426	0.901989	-0.148818	Q9UL25	6	33.3	3.7365e-46
IPI00418262	Fructose-bisphosphate aldolase	0.881034	-0.18273	1.05807	0.0814323	0.883558	-0.178604	P09972	4	14.4	2.4385e-66
IPI00657706	Isoform 1 of Lysophospholipid acyltransferase 7	0.880744	-0.183205	0.746154	-0.422455	0.943177	-0.0843995	Q96N66-1	9	24.6	7.5028e-72
IPI00025178	Pre-mRNA-splicing factor SPF27	0.880442	-0.183699	0.69305	-0.528969	1.42677	0.512756	O75934	2	21.3	4.8595e-31
IPI00152853	Isoform 1 of Phostensin	0.880419	-0.183737	0.669716	-0.578379	0.714415	-0.485166	Q6NYC8-1	3	8.5	3.293e-08
IPI00935722	OTU domain-containing protein 6B	0.880199	-0.184099	2.67656	1.42038	0.520027	-0.943342	Q8N6M0	1	5.8	0.00077667
IPI00165949	Isoform 2 of Endoplasmic reticulum aminopeptidase 1	0.879653	-0.184993	1.02976	0.0423126	0.927205	-0.109039	Q9NZ08-2	22	30.5	6.4007e-149
IPI00414027	intersectin 2 isoform 1	0.879584	-0.185108	1.12582	0.170982	0.885739	-0.175046	Q9NZM3-1	1	1.4	1.3848e-16
IPI00107357	Isoform 2 of Cleft lip and palate transmembrane protein 1	0.878887	-0.18625	0.761518	-0.39305	1.36027	0.443896	O96005-2	6	12.7	2.7312e-101
IPI00009456	5-nucleotidase	0.878794	-0.186403	0.969265	-0.0450376	0.897011	-0.156802	P21589	8	23	1.8072e-43
IPI00446875	Isoform 2 of Endoplasmic reticulum-Golgi intermediate compartment protein 3	0.878667	-0.186612	1.1802	0.239033	0.735499	-0.443205	Q9Y282-2	6	19.3	1.4393e-15
IPI00397947	TMEM189-UBE2V1 readthrough transcript	0.878539	-0.186822	1.23539	0.304963	0.904815	-0.144306	Q13404-1	3	7.8	0.0018141
IPI00883857	Isoform Long of Heterogeneous nuclear ribonucleoprotein U	0.878411	-0.187032	0.730146	-0.453743	1.21613	0.282292	Q00839-1	40	47.8	0
IPI00018248	Isoform 1 of ER lumen protein retaining receptor 2	0.877947	-0.187794	1.09111	0.125798	0.864203	-0.210557	P33947-1	5	34.9	5.4095e-220
IPI00221226	Annexin A6	0.8779	-0.187871	0.922624	-0.116185	0.987892	-0.0175753	P08133	26	51.4	0
IPI00063408	Probable 2-oxoglutarate dehydrogenase E1 component DHKTD1, mitochondrial	0.877494	-0.188539	1.09918	0.136423	0.905045	-0.143938	Q96HY7	3	8.4	2.0189e-52
IPI00165092	Tyrosyl-tRNA synthetase, mitochondrial	0.877425	-0.188653	0.88461	-0.176886	1.14482	0.195121	Q9Y2Z4	11	40	1.6036e-184
IPI00873935	Putative uncharacterized protein DKC1	0.877158	-0.189092	0.571957	-0.806022	1.64107	0.714639	A8MUT5	5	14.8	2.4365e-09
IPI00847168	RSU1 protein (Fragment)	0.876786	-0.189703	1.07781	0.108109	0.695378	-0.524131	Q32Q10	2	17.9	8.9949e-09
IPI00007676	Estradiol 17-beta-dehydrogenase 12	0.875416	-0.191959	0.999966	-4.93903e-05	0.890227	-0.167755	Q53GQ0	12	54.5	6.1989e-94
IPI00926109	Isoform 2 of Putative ATP-dependent RNA helicase DHX30	0.874813	-0.192954	0.600357	-0.736106	1.42802	0.514019	Q7L2E3-2	25	31.5	3.5789e-254
IPI00000581	cDNA FLJ56307, highly similar to Ubiquitin thioesterase protein OTUB1	0.874674	-0.193183	1.18086	0.239837	0.762944	-0.39035	B4DPD5	4	16.6	9.8783e-26
IPI00024143	Aladin	0.874453	-0.193547	0.791096	-0.338075	1.13627	0.184303	Q9NRG9	8	24	1.484e-111
IPI00031458	Protein-S-isoprenylcysteine O-methyltransferase	0.87378	-0.194658	1.24122	0.31176	0.350923	-1.51078	O60725	2	13.4	3.1178e-10
IPI00871988	cDNA FLJ58980, highly similar to Sideroflexin-3	0.873408	-0.195272	1.10155	0.139529	0.881395	-0.182139	B4DRS6	7	32.5	4.76e-46
IPI00029468	Alpha-centractin	0.872758	-0.196346	0.939974	-0.0893075	0.838084	-0.254834	P61163	8	35.6	1.9762e-94
IPI00216719	Isoform 1 of ELKS/RAB6-interacting/CAST family member 1	0.872584	-0.196634	0.844639	-0.243594	0.977993	-0.0321033	Q8IUD2-1	6	5.9	1.1464e-06
IPI00298991	KIAA1033 protein	0.872271	-0.197152	1.27797	0.353859	0.867461	-0.205129	Q2M389-1	4	6.8	3.622e-38
IPI00152890	Isoform 1 of Nucleolar protein 6	0.871981	-0.197632	0.72434	-0.465261	1.13992	0.188932	Q9H6R4-1	14	26.4	5.025e-148
IPI00026271	40S ribosomal protein S14	0.871574	-0.198304	1.1015	0.139475	1.07131	0.0993693	P62263	5	36.4	2.8004e-53
IPI00941161	General vesicular transport factor p115	0.871423	-0.198554	1.36151	0.445203	0.846656	-0.240153	O60763	18	27.9	1.8801e-228
IPI00742670	cDNA FLJ55597, highly similar to Serum paraoxonase/arylesterase 2	0.871017	-0.199227	0.977631	-0.0326375	0.814895	-0.295313	Q15165-2	9	49.6	3.4724e-96
IPI00025039	rRNA 2-O-methyltransferase fibrillarin	0.870924	-0.199381	0.738732	-0.436877	1.03411	0.0483965	P22087	2	13.1	0.0058268
IPI00643591	cDNA FLJ46199 fis, clone TESTI4007965, highly similar to AP-1 complex subunit gamma-1	0.870855	-0.199496	1.18186	0.241057	0.873669	-0.194841	B3KNW1	13	19.5	5.4002e-122
IPI00892541	HLA-B associated transcript 3	0.869868	-0.201132	0.929649	-0.105242	0.924255	-0.113637	B0UX85	16	22.8	1.6079e-119
IPI00642211	Aminopeptidase B	0.869357	-0.201979	1.13746	0.185821	0.998847	-0.00166465	Q9H4A4	18	36.6	6.8422e-58
IPI00419802	Isoform 1 of 3-hydroxyisobutyryl-CoA hydrolase, mitochondrial	0.869206	-0.202229	0.964869	-0.0515951	1.01701	0.024333	Q6NVY1-1	3	13.2	1.1821e-14
IPI00395694	Isoform 2 of Transportin-3	0.869172	-0.202287	0.930868	-0.103352	0.898847	-0.153853	Q9Y5L0-2	15	25	2.2555e-159
IPI00419531	Cleavage and polyadenylation specificity factor subunit 2	0.868533	-0.203347	1.1478	0.198874	0.765001	-0.386467	Q9P2I0	4	8.3	8.2975e-78
IPI00219604	Dual specificity mitogen-activated protein kinase kinase 1	0.867651	-0.204813	1.08024	0.111349	0.811532	-0.30128	Q02750	7	25.7	1.0202e-32
IPI00021805	Microsomal glutathione S-transferase 1	0.867465	-0.205122	0.853498	-0.22854	0.943292	-0.0842232	P10620	5	49	4.2372e-105
IPI00003802	Alpha-mannosidase 2	0.86678	-0.206262	0.772829	-0.371779	1.14319	0.193061	Q16706	9	10.1	1.7783e-51
IPI00001730	FH1/FH2 domain-containing protein 1	0.86663	-0.206513	1.70746	0.771854	0.608082	-0.717663	Q9Y613	4	6.2	1.9565e-06
IPI00790214	39 kDa protein	0.866432	-0.206841	1.0645	0.0901813	0.981837	-0.026444	Q14257	12	52.2	1.0885e-233
IPI00024802	TATA-binding protein-associated factor 172	0.866421	-0.206861	0.646656	-0.62893	1.16385	0.218902	O14981	8	8.8	4.5505e-56
IPI00021320	7SK snRNA methylphosphate capping enzyme	0.865968	-0.207615	0.546144	-0.872646	1.12916	0.175245	Q7L2J0	3	9.7	7.2068e-12
IPI00218466	cDNA FLJ59739, highly similar to Protein transport protein Sec61 subunit alpha isoform 1	0.865771	-0.207943	0.95731	-0.0629419	0.869114	-0.202383	B4DR61	11	30.3	1.157e-211
IPI00005861	Isoform 1 of U4/U6 small nuclear ribonucleoprotein Prp3	0.865573	-0.208272	0.833013	-0.26359	1.11128	0.152225	O43395-1	7	17.7	1.4467e-31
IPI00026216	Puromycin-sensitive aminopeptidase	0.865086	-0.209085	0.988751	-0.0163213	0.804594	-0.313668	P55786	23	36.3	2.8147e-200
IPI00465432	Isoform 1 of Nodal modulator 2	0.864923	-0.209356	0.828138	-0.272057	1.0714	0.0994987	Q5JPE7-1	35	42.9	0
IPI00604664	NADH-ubiquinone oxidoreductase 75 kDa subunit	0.864575	-0.209937	1.04239	0.0598934	0.85147	-0.231972	B4DJA0	20	40.9	0
IPI00215911	DNA-(apurinic or apyrimidinic site) lyase	0.864436	-0.210169	0.740731	-0.432978	1.07255	0.101051	P27695	9	38.4	2.284e-25
IPI00217952	Isoform 1 of Glucosamine--fructose-6-phosphate aminotransferase [isomerizing] 1	0.864366	-0.210286	1.20521	0.26928	0.747425	-0.42	Q06210-1	20	41.1	6.6295e-162
IPI00012442	Ras GTPase-activating protein-binding protein 1	0.864053	-0.210809	0.763832	-0.388672	1.18018	0.239012	Q13283	15	45.1	9.3401e-221
IPI00019385	Translocon-associated protein subunit delta precursor	0.864029	-0.210848	1.09292	0.128186	0.893206	-0.162935	P51571	4	28.8	3.2558e-49
IPI00646917	Cleavage and polyadenylation specificity factor subunit 5	0.863844	-0.211158	0.804735	-0.313414	1.33288	0.414552	O43809	9	51.1	1.4551e-33
IPI00924788	arylacetamide deacetylase-like 1 isoform a	0.863774	-0.211274	0.883008	-0.179501	0.981261	-0.0272915	Q6PIU2-2	11	35.9	1.634e-94
IPI00010154	Rab GDP dissociation inhibitor alpha	0.863066	-0.212457	1.11816	0.161121	0.793706	-0.333324	P31150	20	62	0
IPI00473047	cDNA FLJ40287 fis, clone TESTI2027909, highly similar to 5-AMP-ACTIVATED PROTEIN KINASE, GAMMA-1 SUBUNIT	0.862277	-0.213777	1.3257	0.406751	0.896204	-0.158101	P54619	2	10.9	1.0027e-15
IPI00922855	TUBGCP2 protein	0.862126	-0.21403	0.9179	-0.123592	0.730396	-0.453249	B7ZKL8	2	2.6	0.0016039
IPI00018404	elongin A	0.861801	-0.214574	1.36411	0.447957	0.851047	-0.232688	Q14241	3	4.5	0.00087993
IPI00012833	Serine/threonine-protein phosphatase 4 catalytic subunit	0.861685	-0.214768	0.890471	-0.167359	0.726071	-0.461816	P60510	4	18.6	1.7558e-40
IPI00011913	Heterogeneous nuclear ribonucleoprotein A0	0.861685	-0.214768	0.844981	-0.243009	0.961368	-0.0568386	Q13151	4	19	6.0948e-43
IPI00759542	Isoform 8 of Titin	0.861162	-0.215643	0.962719	-0.0548133	0.841505	-0.248956	Q8WZ42-8	7	0.2	0.72408
IPI00151358	Isoform 1 of Cleft lip and palate transmembrane protein 1-like protein	0.861093	-0.215759	1.04211	0.0595143	0.910974	-0.134518	Q96KA5-1	7	20.4	4.9236e-36
IPI00000811	Proteasome subunit beta type-6	0.860953	-0.215993	0.991257	-0.0126695	0.883577	-0.178573	P28072	4	29.3	1.0859e-16
IPI00844214	Isoform 1 of Beta-catenin-like protein 1	0.860153	-0.217336	0.858086	-0.220806	1.04075	0.0576176	Q8WYA6-1	6	14	6.1663e-284
IPI00747810	FSCN1 protein (Fragment)	0.859758	-0.217998	1.07513	0.104511	0.822237	-0.282374	Q96IH1	26	58.8	0
IPI00893485	Putative uncharacterized protein INTS1	0.859537	-0.218368	0.845707	-0.241771	0.992504	-0.0108547	B7WPI4	19	15.9	0
IPI00071703	Elongation factor G 2, mitochondrial precursor	0.859491	-0.218446	0.900481	-0.151232	1.00961	0.0137979	Q969S9-1	2	3.8	1.3863e-53
IPI00549664	Testis-expressed sequence 10 protein	0.859236	-0.218874	0.950723	-0.0729025	0.883221	-0.179153	Q9NXF1	15	23.9	4.6846e-100
IPI00012773	Isoform Long of Metastasis-associated protein MTA1	0.859224	-0.218894	1.04514	0.0636978	0.657332	-0.605305	Q13330-1	3	4.9	1.9025e-20
IPI00028954	80 kDa MCM3-associated protein	0.859201	-0.218933	1.0085	0.0122067	0.64015	-0.643518	O60318	5	4.4	3.6821e-74
IPI00026044	Isoform 1 of Phosphatidylinositol glycan anchor biosynthesis class U protein	0.858771	-0.219654	0.959652	-0.0594173	0.86699	-0.205912	Q9H490-1	4	12.9	9.4732e-96
IPI00001663	Isoform 1 of Serine protease HTRA2, mitochondrial	0.858586	-0.219966	0.986039	-0.0202829	0.848434	-0.237126	O43464-1	1	6.1	6.7001e-31
IPI00007940	ER lipid raft associated 1	0.858435	-0.22022	0.881132	-0.18257	1.09254	0.12769	B2RDK6	7	25.3	3.5849e-131
IPI00479186	Isoform M2 of Pyruvate kinase isozymes M1/M2	0.858063	-0.220844	1.06226	0.0871345	0.826014	-0.275762	P14618-1	44	78.5	0
IPI00552073	Putative pre-mRNA-splicing factor ATP-dependent RNA helicase DHX16	0.857564	-0.221684	0.836477	-0.257602	1.11666	0.159194	O60231	12	16.1	1.337e-77
IPI00300333	Isoform 1 of RNA polymerase II-associated factor 1 homolog	0.856786	-0.222993	0.47643	-1.06966	1.74592	0.803984	Q8N7H5-1	5	14.3	4.5592e-22
IPI00783378	Ubiquitin-conjugating enzyme E2 O	0.856763	-0.223032	1.05641	0.0791713	0.627772	-0.671686	Q9C0C9	5	7.3	5.9279e-09
IPI00020472	Isoform 1 of Transmembrane protein 111	0.856728	-0.22309	0.954393	-0.0673442	0.706381	-0.501482	Q9P0I2-1	3	19.5	3.8541e-33
IPI00152407	hypothetical protein LOC147339 isoform b	0.856717	-0.22311	0.887335	-0.172449	1.1208	0.164523	Q96B23-2	2	11.4	1.1489e-07
IPI00893541	Putative uncharacterized protein PDIA3	0.856276	-0.223853	1.28041	0.356608	0.677945	-0.560759	C9JKU1	6	48.8	3.4647e-140
IPI00549725	Phosphoglycerate mutase 1	0.855904	-0.224479	1.17619	0.23412	0.91946	-0.121141	P18669	13	60.6	5.7197e-116
IPI00006713	DnaJ homolog subfamily C member 3	0.855695	-0.224831	0.957461	-0.0627149	0.992889	-0.0102961	Q13217	12	38.1	1.5158e-130
IPI00396437	Isoform 2 of Drebrin-like protein	0.85566	-0.22489	1.07373	0.102636	0.755487	-0.404521	Q9UJU6-2	9	30.2	6.1822e-160
IPI00024642	Isoform 1 of Coiled-coil domain-containing protein 47	0.855533	-0.225105	0.84813	-0.237642	1.04113	0.0581504	Q96A33-1	16	41.2	7.4341e-183
IPI00018140	Isoform 1 of Heterogeneous nuclear ribonucleoprotein Q	0.855324	-0.225457	0.713823	-0.486362	1.13723	0.185522	O60506-1	26	57.5	0
IPI00171134	Isoform 1 of Girdin	0.855126	-0.22579	1.30258	0.381374	0.961272	-0.0569829	Q3V6T2-1	3	1.1	0.36572
IPI00304895	Molybdenum cofactor sulfurase	0.854987	-0.226025	1.63201	0.70665	0.557621	-0.842644	Q96EN8	12	23.3	8.7384e-79
IPI00477536	filamin B isoform 3	0.854767	-0.226398	0.676412	-0.564026	1.46262	0.548553	O75369-2	171	84.3	0
IPI00216008	Isoform Long of Glucose-6-phosphate 1-dehydrogenase	0.854349	-0.227103	1.03334	0.0473111	0.87513	-0.192431	P11413-2	27	55.3	1.5638e-212
IPI00396378	Isoform B1 of Heterogeneous nuclear ribonucleoproteins A2/B1	0.853989	-0.227711	0.73435	-0.445461	1.16318	0.218068	P22626-1	16	47	4.2455e-294
IPI00171614	Monocarboxylate transporter 2	0.853374	-0.22875	1.06934	0.0967177	0.705112	-0.504075	O60669	2	4	0.011163
IPI00021812	Neuroblast differentiation-associated protein AHNAK	0.853362	-0.22877	0.798792	-0.324108	1.07515	0.104537	Q09666	270	76.7	0
IPI00032140	Serpin H1	0.853026	-0.229339	0.864755	-0.209637	1.02374	0.0338442	P50454	18	55	8.8544e-212
IPI00908725	cDNA FLJ61387, highly similar to Homo sapiens conserved nuclear protein NHN1 (NHN1), mRNA	0.852817	-0.229693	0.74069	-0.433058	1.25591	0.328733	B4DTK7	8	13.9	3.3006e-38
IPI00013174	Isoform 1 of RNA-binding protein 14	0.852793	-0.229732	0.806639	-0.310005	0.935047	-0.0968891	Q96PK6-1	16	36.5	1.5823e-45
IPI00464968	Cytochrome c oxidase subunit 1	0.852631	-0.230007	0.620994	-0.687349	1.41197	0.497713	P00395	2	8.7	6.757e-07
IPI00024971	Isoform 1 of Oxysterol-binding protein 1	0.852445	-0.230321	0.873162	-0.195678	0.933519	-0.0992485	P22059-1	9	18.5	3.4497e-27
IPI00027442	Alanyl-tRNA synthetase, cytoplasmic	0.852306	-0.230557	1.24229	0.313001	0.705574	-0.503131	P49588	44	65.2	0
IPI00719622	40S ribosomal protein S28	0.851923	-0.231205	1.13923	0.188059	0.776562	-0.364828	P62857	2	30.4	2.3307e-15
IPI00012079	cDNA FLJ54492, highly similar to Eukaryotic translation initiation factor 4B	0.851865	-0.231304	1.26027	0.333731	0.750865	-0.413375	P23588	12	29.2	3.745e-287
IPI00005614	Isoform Long of Spectrin beta chain, brain 1	0.85183	-0.231363	0.656378	-0.607401	1.29262	0.370298	Q01082-1	154	75.4	0
IPI00386271	Calcium-binding mitochondrial carrier protein Aralar1	0.851354	-0.232169	0.910272	-0.13563	0.91281	-0.131614	O75746	12	28.2	1.4421e-56
IPI00003985	Mitochondrial chaperone BCS1	0.85118	-0.232464	1.13929	0.188129	0.770171	-0.376749	Q9Y276	5	21	1.2458e-31
IPI00004273	Isoform 1 of RNA-binding protein 25	0.850507	-0.233606	0.861304	-0.215406	0.925005	-0.112467	P49756-1	7	13.8	9.9058e-39
IPI00020508	Isoform 1 of N(2),N(2)-dimethylguanosine tRNA methyltransferase	0.850495	-0.233625	0.61238	-0.7075	1.35105	0.434078	Q9NXH9-1	7	19.6	1.0613e-25
IPI00010402	Putative uncharacterized protein	0.849775	-0.234847	0.860619	-0.216553	1.01441	0.0206476	Q86Z22	3	12.8	5.1246e-17
IPI00020436	Ras-related protein Rab-11B	0.849439	-0.235418	0.972647	-0.0400119	0.907265	-0.140404	Q15907	7	42.2	2.3189e-80
IPI00909772	cDNA FLJ53069, highly similar to AP-2 complex subunit mu-1	0.849137	-0.235931	0.97618	-0.0347811	1.10773	0.147601	B4DNB9	7	23.7	1.1541e-13
IPI00016458	Isoform 1 of L-2-hydroxyglutarate dehydrogenase, mitochondrial	0.848777	-0.236542	0.807666	-0.30817	0.996925	-0.00444334	Q9H9P8-1	4	14.5	1.5631e-40
IPI00003818	Kynureninase	0.84793	-0.237983	1.43195	0.517977	0.665376	-0.587759	Q16719	9	26.5	3.744e-115
IPI00033349	Prolactin regulatory element-binding protein	0.847918	-0.238003	1.21728	0.283666	0.912204	-0.132571	Q9HCU5	3	15.6	1.0203e-08
IPI00006663	Aldehyde dehydrogenase, mitochondrial	0.847651	-0.238457	0.710112	-0.493881	1.0912	0.125912	P05091	17	53.6	1.9413e-208
IPI00554469	Isoform 2 of Mitochondrial inner membrane protein	0.847628	-0.238497	0.632318	-0.661277	1.45676	0.542759	Q16891-2	34	56.1	0
IPI00420065	Isoform 1 of Acyl-CoA dehydrogenase family member 11	0.847326	-0.239011					Q709F0-1	2	7.6	1.7826e-09
IPI00742743	Isoform 2 of Tumor suppressor p53-binding protein 1	0.84634	-0.240691	0.881598	-0.181808	1.03604	0.0510754	Q12888-2	29	23.5	3.935e-275
IPI00914048	basophilic leukemia expressed protein BLES03 isoform 1	0.846142	-0.241028	1.53246	0.615847	0.503738	-0.989254	Q9H3H3	2	13	1.8209e-18
IPI00221224	Aminopeptidase N	0.846026	-0.241226	0.8875	-0.172181	0.962522	-0.0551091	P15144	47	55	0
IPI00021695	Isoform D of Plasma membrane calcium-transporting ATPase 1	0.845539	-0.242057	0.961487	-0.0566614	0.806938	-0.30947	P20020-1	10	11.4	1.4398e-124
IPI00298308	Isoform 1 of Probable 10-formyltetrahydrofolate dehydrogenase ALDH1L2	0.845365	-0.242355	1.07004	0.0976596	0.803796	-0.315099	Q3SY69-1	9	15.8	5.481e-70
IPI00003004	Mitochondrial glutamate carrier 1	0.845341	-0.242394	1.16947	0.22585	0.721353	-0.471223	Q9H936	2	8.7	1.352e-14
IPI00021267	Ephrin type-A receptor 2	0.845132	-0.242751	0.845775	-0.241654	1.00663	0.00953463	P29317	45	61.8	0
IPI00376394	Sulfhydryl oxidase 2	0.845074	-0.24285	0.676768	-0.563267	1.12397	0.1686	Q6ZRP7	12	24.4	4.9955e-98
IPI00028946	Isoform 3 of Reticulon-3	0.844889	-0.243167	1.18806	0.24861	0.809994	-0.304016	O95197-3	4	30.9	2.8784e-14
IPI00017339	Splicing factor 3B subunit 4	0.844831	-0.243266	0.92261	-0.116207	0.98597	-0.0203849	Q15427	5	23.1	2.7801e-110
IPI00295741	Cathepsin B	0.844773	-0.243365	0.832177	-0.265037	1.10081	0.138562	P07858	6	23.3	4.5012e-64
IPI00410488	Isoform 1 of CD276 antigen	0.844773	-0.243365	0.531506	-0.911843	1.25072	0.32276	Q5ZPR3-1	5	21.5	8.9992e-73
IPI00719680	Isoform 5 of AP-3 complex subunit delta-1	0.844726	-0.243444	0.923624	-0.114623	0.899164	-0.153344	O14617-5	4	5.8	0.00075049
IPI00922428	cDNA FLJ51089, highly similar to FK506-binding protein 9	0.844691	-0.243504	0.686819	-0.541998	1.15674	0.21006	B7Z6H3	5	12	7.0863e-62
IPI00902614	Ubiquitin carboxyl-terminal hydrolase 24	0.84396	-0.244753	1.04049	0.0572566	0.765991	-0.384601	Q9UPU5	13	8.3	4.46e-186
IPI00927682	Putative uncharacterized protein RAB3GAP1	0.843798	-0.245031	1.57354	0.654012	0.825332	-0.276954	C9J837	3	4.6	9.8754e-08
IPI00002324	Isoform 1 of Methionine adenosyltransferase 2 subunit beta	0.84266	-0.246977	1.14862	0.199907	0.75984	-0.396232	Q9NZL9-1	8	31.1	4.3718e-51
IPI00016621	Isoform 2 of AP-2 complex subunit alpha-2	0.842497	-0.247256	1.00051	0.000740651	0.737277	-0.439722	O94973-2	21	32.6	5.5968e-204
IPI00220578	Guanine nucleotide-binding protein G(k) subunit alpha	0.842486	-0.247276	0.797204	-0.32698	0.960331	-0.058397	P08754	10	43.2	2.4045e-27
IPI00014456	Isoform 1 of Striatin	0.842103	-0.247932	1.22397	0.291564	0.706323	-0.501599	O43815-1	2	4.5	4.6656e-08
IPI00220031	Isoform Gamma of Paxillin	0.841755	-0.248528	0.935195	-0.0966613	0.85664	-0.223238	P49023-3	8	25.6	5.9825e-76
IPI00306048	Isoform 1 of ATPase family AAA domain-containing protein 3B	0.841546	-0.248887	0.896757	-0.157212	0.82635	-0.275175	Q5T9A4-1	21	41.2	3.649e-100
IPI00026219	Cleavage and polyadenylation specificity factor subunit 1	0.841	-0.249822	0.950806	-0.0727778	1.02287	0.0326248	Q10570	13	14.3	2.869e-101
IPI00289758	Calpain-2 catalytic subunit	0.840675	-0.25038	1.0345	0.0489353	0.849741	-0.234906	P17655	22	41.9	1.7017e-292
IPI00012345	Isoform SRP55-1 of Splicing factor, arginine/serine-rich 6	0.840513	-0.250659	0.983246	-0.024376	0.849837	-0.234743	Q13247-1	6	17.7	4.5314e-07
IPI00020567	Rho GTPase-activating protein 1	0.839642	-0.252154	0.916722	-0.125444	0.850519	-0.233585	Q07960	9	35.8	1.695e-35
IPI00021175	Isoform 1 of Cell division cycle 2-related protein kinase 7	0.839224	-0.252872	0.709195	-0.495747	1.40755	0.49319	Q9NYV4-1	7	6.2	2.2205e-31
IPI00329373	Protein QIL1	0.839073	-0.253131	0.796012	-0.329137	1.19508	0.257107	Q5XKP0	1	16.9	1.4616e-22
IPI00787089	Isoform 2 of Proline-, glutamic acid- and leucine-rich protein 1	0.837889	-0.255168	0.871711	-0.198078	1.01086	0.0155819	Q8IZL8-2	23	34.1	1.4004e-207
IPI00443909	Isoform 1 of Protein canopy homolog 2	0.837727	-0.255448	0.937755	-0.0927163	0.91674	-0.125415	Q9Y2B0-1	7	44.5	3.9803e-23
IPI00375144	Isoform 1 of Serrate RNA effector molecule homolog	0.837669	-0.255548	0.753096	-0.409093	1.133	0.180148	Q9BXP5-1	32	40.9	8.8478e-94
IPI00871903	Putative uncharacterized protein PLRG1	0.837587	-0.255688	0.648381	-0.625086	1.48097	0.566545	A8MW61	4	12.1	1.0762e-16
IPI00828189	Isoform 2 of Protein-L-isoaspartate(D-aspartate) O-methyltransferase	0.837309	-0.256168	1.28359	0.360183	0.8042	-0.314375	P22061-2	3	15.4	3.1235e-10
IPI00470859	Putative uncharacterized protein DKFZp686C04126	0.83703	-0.256648	1.09073	0.125291	0.791995	-0.336437	Q68D80	2	2.6	6.2919e-05
IPI00397571	Isoform 3 of NSFL1 cofactor p47	0.835649	-0.259031	1.16288	0.217701	0.602585	-0.730763	Q9UNZ2-5	8	27.4	2.5904e-133
IPI00008495	NADH-ubiquinone oxidoreductase chain 4	0.835637	-0.259051	0.787933	-0.343855	1.15885	0.212695	P03905	4	12.4	3.4486e-40
IPI00219077	Isoform 1 of Leukotriene A-4 hydrolase	0.834976	-0.260194	0.995707	-0.00620677	0.749606	-0.415796	P09960-1	18	41.9	3.8201e-193
IPI00410717	Isoform 1 of Pogo transposable element with ZNF domain	0.834639	-0.260775	0.854964	-0.226065	0.955487	-0.0656915	Q7Z3K3-1	19	20.8	9.985e-179
IPI00788879	Isoform 1 of TBC1 domain family member 23	0.833989	-0.261899	0.638508	-0.647224	0.89311	-0.163091	Q9NUY8-1	2	5.9	7.6739e-15
IPI00170786	WW domain-binding protein 11	0.833873	-0.2621	0.601371	-0.733673	0.904478	-0.144842	Q9Y2W2	6	16.8	2.6443e-68
IPI00024163	DNA-directed RNA polymerase III subunit RPC1	0.833757	-0.262301	0.965444	-0.0507354	1.07611	0.105825	O14802	11	11.5	2.4493e-61
IPI00022078	Protein NDRG1	0.833687	-0.262422	1.13067	0.17718	0.732587	-0.448928	Q92597	2	8.4	0.00034242
IPI00216694	Plastin-3	0.833409	-0.262904	1.1119	0.153024	0.816865	-0.29183	P13797	21	47.3	1.0965e-119
IPI00549381	39S ribosomal protein L1, mitochondrial	0.833304	-0.263085	0.898208	-0.154878	0.952008	-0.0709537	Q9BYD6	4	21.2	1.6131e-74
IPI00647400	Putative uncharacterized protein RNPEP	0.833037	-0.263547	1.03582	0.0507674	0.786123	-0.347172	A6NKB8	19	44.7	7.8374e-88
IPI00013004	Isoform 1 of Pyridoxal kinase	0.832805	-0.263949	1.20125	0.264535	0.723832	-0.466272	O00764-1	5	20.5	7.3782e-125
IPI00783919	Putative uncharacterized protein SUMF2	0.832794	-0.263969	0.884364	-0.177288	0.855824	-0.224615	C9JL30	5	19.5	3.3137e-12
IPI00100030	Isoform 1 of GPI transamidase component PIG-T	0.832712	-0.26411	0.812322	-0.299877	0.860926	-0.216038	Q969N2-1	3	9.3	2.9803e-37
IPI00479877	aldehyde dehydrogenase 9A1	0.832376	-0.264693	0.970867	-0.0426548	0.834422	-0.26115	P49189	10	25.1	3.6675e-84
IPI00021537	Isoform 1 of Opioid growth factor receptor	0.831795	-0.265699	0.554525	-0.850676	0.87611	-0.190816	Q9NZT2-1	6	21.7	1.8808e-124
IPI00012645	Isoform 1 of Spectrin beta chain, brain 2	0.831772	-0.26574	0.631182	-0.663872	1.20728	0.271765	O15020-1	39	23.5	0
IPI00020021	Protein DEK	0.831447	-0.266304	0.664731	-0.589157	1.33577	0.417669	P35659	7	24.8	4.2476e-35
IPI00398765	cDNA FLJ34415 fis, clone HEART2004764, highly similar to CALCIUM/CALMODULIN-DEPENDENT 3,5-CYCLIC NUCLEOTIDE PHOSPHODIESTERASE 1C	0.831389	-0.266404	1.00233	0.00336443	0.863165	-0.212291	Q8NB10	11	20	2.4372e-89
IPI00411937	Nucleolar protein 56	0.831157	-0.266807	1.03832	0.0542535	0.787305	-0.345005	O00567	7	17.3	3.4803e-122
IPI00008711	Wolframin	0.830983	-0.267109	0.869493	-0.201754	1.10196	0.140072	O76024	11	18.4	7.4483e-64
IPI00894235	Isoform 1 of Neurobeachin-like protein 2	0.830971	-0.26713	0.972537	-0.0401744	0.69335	-0.528344	Q6ZNJ1-1	2	0.9	0.0018994
IPI00083708	Isoform 7 of BAT2 domain-containing protein 1	0.830809	-0.267412	1.00076	0.00109603	0.772833	-0.371771	Q9Y520-7	13	7.2	2.4471e-23
IPI00171494	Isoform 2 of Cytoplasmic dynein 2 heavy chain 1	0.830727	-0.267553	0.884706	-0.17673	0.880021	-0.18439	Q8NCM8-2	5	2	6.6144e-05
IPI00646304	Peptidyl-prolyl cis-trans isomerase B	0.830716	-0.267573	0.859702	-0.218092	1.04209	0.0594814	P23284	14	54.2	8.0894e-138
IPI00828021	Heat shock 70kDa protein 4-like, isoform CRA_b	0.830646	-0.267694	1.21924	0.285985	0.774419	-0.368814	A2ICT2	8	12.9	1.7951e-93
IPI00011651	Isoform 1 of Receptor-type tyrosine-protein phosphatase gamma	0.830495	-0.267956	0.883679	-0.178405	0.716212	-0.481542	P23470-1	3	4.6	1.2148e-26
IPI00031131	Isoform 1 of Adipocyte plasma membrane-associated protein	0.830275	-0.268339	0.974674	-0.037009	0.846483	-0.240447	Q9HDC9-1	16	55.8	1.3757e-203
IPI00060569	Isoform 2 of Monoacylglycerol lipase ABHD12	0.830252	-0.26838	1.23333	0.302563	0.604517	-0.726146	Q8N2K0-2	4	16.1	5.6263e-12
IPI00300659	Parafibromin	0.829718	-0.269308	0.41526	-1.26791	1.96166	0.972073	Q6P1J9	4	10.7	9.5892e-22
IPI00006725	Probable ATP-dependent RNA helicase DDX23	0.829369	-0.269913	0.856703	-0.223133	0.897799	-0.155535	Q9BUQ8	13	21.7	9.3169e-67
IPI00293748	Isoform 1 of Multiple inositol polyphosphate phosphatase 1	0.829358	-0.269934	0.73728	-0.439715	1.53114	0.614602	Q9UNW1-1	5	19.1	1.9892e-42
IPI00015956	Exosome complex exonuclease RRP40	0.828719	-0.271045	0.673372	-0.570524	1.10725	0.146976	Q9NQT5	5	34.2	3.1361e-50
IPI00784294	DOCK4 protein	0.82865	-0.271166	0.838997	-0.253263	1.00077	0.0011087	Q149N5	6	6.2	4.7621e-118
IPI00015952	cDNA FLJ59571, highly similar to Eukaryotic translation initiation factor 4gamma 2	0.828255	-0.271853	1.22639	0.294418	0.69311	-0.528844	B4DZF2	9	11.4	4.97e-74
IPI00017448	40S ribosomal protein S21	0.828162	-0.272015	0.994173	-0.00843067	0.885278	-0.175798	P63220	4	57.8	2.46e-05
IPI00553131	UDP-glucose 4-epimerase	0.828081	-0.272156	1.39662	0.481936	0.797598	-0.326267	Q14376	3	17.5	2.2259e-09
IPI00031556	Isoform 1 of Splicing factor U2AF 65 kDa subunit	0.828046	-0.272217	0.679205	-0.55808	1.09081	0.125404	P26368-1	12	44.8	2.2283e-105
IPI00012512	cDNA FLJ61162, highly similar to Ras-related protein R-Ras2	0.827059	-0.273937	0.878791	-0.186409	1.21026	0.275321	P62070	3	18.6	2.2575e-27
IPI00298058	Isoform 1 of Transcription elongation factor SPT5	0.826897	-0.274221	0.660966	-0.597353	1.04997	0.0703497	O00267-1	23	31.6	5.8952e-202
IPI00290085	Cadherin-2	0.826723	-0.274524	0.651325	-0.61855	1.23775	0.307717	P19022	12	23.5	4.8106e-121
IPI00926625	Zyxin	0.826584	-0.274767	0.685272	-0.545252	0.883269	-0.179075	Q15942	9	28.7	1.6238e-48
IPI00513791	Isoform 1 of Dedicator of cytokinesis protein 7	0.826409	-0.275071	0.840229	-0.251145	0.953123	-0.0692654	Q96N67-1	17	14.2	1.5884e-168
IPI00011302	CD59 glycoprotein	0.82591	-0.275943	0.913559	-0.130431	0.922304	-0.116685	P13987	3	25	1.5504e-17
IPI00026182	F-actin-capping protein subunit alpha-2	0.825307	-0.276998	1.05981	0.0838016	0.848491	-0.237028	P47755	4	21	3.1287e-25
IPI00009943	Tumor protein, translationally-controlled 1	0.824889	-0.277728	1.08176	0.113378	0.864319	-0.210365	Q5W0H4	6	42	1.5531e-99
IPI00024913	Isoform Long of ES1 protein homolog, mitochondrial	0.824726	-0.278013	0.896825	-0.157101	0.780646	-0.35726	P30042-1	4	22.4	2.9317e-21
IPI00013455	Isoform 1 of CAP-Gly domain-containing linker protein 1	0.82468	-0.278094	1.21582	0.281928	0.69532	-0.524251	P30622-3	8	7.8	1.8498e-12
IPI00152510	DEAD (Asp-Glu-Ala-Asp) box polypeptide 54 isoform 1	0.824552	-0.278317	0.967128	-0.0482207	0.890179	-0.167833	B9ZVP3	17	30.8	4.4424e-136
IPI00339384	Isoform 1 of Retinol dehydrogenase 11	0.824529	-0.278358	1.08381	0.116115	0.881578	-0.18184	Q8TC12-1	3	14.8	6.8781e-14
IPI00644297	superkiller viralicidic activity 2-like homolog	0.824425	-0.278541	0.549513	-0.863775	1.01566	0.0224233	B4DM01	3	4.6	0.00034965
IPI00556385	Isoform 1 of ADP-dependent glucokinase	0.823682	-0.279841	0.991777	-0.0119124	0.946031	-0.0800404	Q9BRR6-1	5	18.3	9.9191e-54
IPI00014194	Uncharacterized protein C2orf29	0.823264	-0.280573	0.676015	-0.564873	1.38065	0.465343	Q9UKZ1	1	3.5	4.786e-61
IPI00940000	DEAD box polypeptide 17 isoform 3	0.822916	-0.281184	0.633496	-0.658592	1.15712	0.21054	Q59F66	25	46.9	1.0603e-203
IPI00005978	Splicing factor, arginine/serine-rich 2	0.822324	-0.282222	0.84683	-0.239856	1.07774	0.108014	Q01130	6	29.9	1.7551e-51
IPI00027378	Isoform 1 of UBX domain-containing protein 1	0.821906	-0.282955	0.911176	-0.134198	0.725947	-0.462065	Q04323-1	5	34.3	4.5347e-63
IPI00923582	secernin 1 isoform b	0.821407	-0.283832	1.38457	0.469434	0.797559	-0.326337	B4DHM0	5	15.4	1.5213e-64
IPI00028055	Transmembrane emp24 domain-containing protein 10	0.821116	-0.284341	0.98923	-0.0156222	0.903719	-0.146054	P49755	5	22.4	1.1211e-34
IPI00419373	Isoform 1 of Heterogeneous nuclear ribonucleoprotein A3	0.820896	-0.284729	0.709496	-0.495134	1.09139	0.126166	P51991-1	7	24.1	1.1631e-122
IPI00301163	KTEL motif-containing protein 1	0.820826	-0.284851	0.574559	-0.799474	1.62973	0.704635	Q8NBL1	2	10.7	0.00080758
[truncated: 900 more rows]
